# Supplementary material for: Facile synthesis of chiral indolines through asymmetric hydrogenation of in situ generated indoles
Source: Royal Society of Chemistry journal article supplement (doi:10.1039/c8qo00710a), 2018-01-01

## Supporting Information

### Facile Synthesis of Chiral Indolines through Asymmetric Hydrogenation of *in situ* Generated Indoles

#### Table of Contents

|                                                                      |        |
|----------------------------------------------------------------------|--------|
| 1. General.....                                                      | S1     |
| 2. General Procedure for the Synthesis of Substrates.....            | S1-3   |
| 3. Asymmetric Hydrogenation of <i>in situ</i> Generated Indoles..... | S4-7   |
| 4. The Mechanistic Investigation.....                                | S7-8   |
| 5. The Scale-up Experiment.....                                      | S8     |
| 6. References.....                                                   | S9     |
| 7. Copy of NMR and HPLC for the Compounds.....                       | S10-88 |

## 1. General

Commercially available reagents were used without further purification. Solvents were treated prior to use according to the standard methods.  $^1\text{H}$  NMR and  $^{13}\text{C}$  NMR spectra were recorded at room temperature in  $\text{CDCl}_3$  on 400 MHz instrument with TMS (tetramethylsilane) as internal standard. Enantiomeric excess was determined by HPLC analysis, using chiral column described below in detail. Optical rotations were measured by polarimeter. Flash column chromatography was performed on silica gel (200-300 mesh).

## 2. General Procedure for the Synthesis of Substrates

The compounds **2** can be prepared from compounds **1** and the corresponding Weinreb amides according to the known literature procedure with minor modification.<sup>[1]</sup> Compounds **1** could be conveniently prepared from di-*tert*-butyl dicarbonate and aryl amines.<sup>[2]</sup> Weinreb amides could be prepared from the corresponding acyl chloride and *N,O*-dimethylhydroxylamine hydrochloride.<sup>[3]</sup>

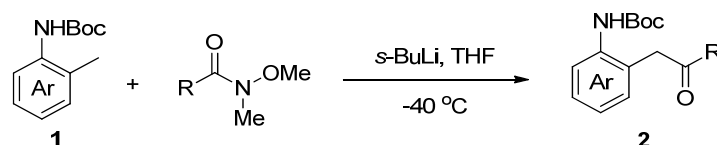

**General procedure:** Under nitrogen, compounds **1** (3 mmol) in THF (15 mL) was cooled to -40 °C. Then *sec*-butyllithium (*s*-BuLi, 6.90 mL of 1.0 M in hexane, 6.9 mmol) was added slowly. After stirring for one hour, a solution of Weinreb amide (3 mmol) in THF (5 mL) was added. The mixture was stirred at -40 °C over a period of thirty minutes and quenched with water (5 mL) carefully. Then the mixture was extracted with dichloromethane (10 mL×3), the combined organic layer was washed with brine, dried over sodium sulfate and concentrated in *vacuo*. The residue was purified by flash chromatography to give desired compounds **2**.

***tert*-Butyl (2-(2-oxo-3-phenylpropyl)phenyl)carbamate (2a):** white solid, mp 98-99 °C, 91% yield, new compound,  $R_f$  = 0.42 (hexanes/ethyl acetate 5/1).  $^1\text{H}$  NMR (400 MHz,  $\text{CDCl}_3$ )  $\delta$  7.75 (d,  $J$  = 8.1 Hz, 1H), 7.37-7.27 (m, 4H), 7.26-7.21 (m, 1H), 7.18-7.13 (m, 2H), 7.05-6.99 (m, 2H), 3.81 (s, 2H), 3.72 (s, 2H), 1.50 (s, 9H);  $^{13}\text{C}$  NMR (100 MHz,  $\text{CDCl}_3$ )  $\delta$  207.5, 153.6, 137.4, 133.3, 130.6, 129.6, 128.9, 128.3, 127.4, 125.4, 124.3, 123.7, 80.3, 49.8, 45.7, 28.4. HRMS Calculated for  $\text{C}_{20}\text{H}_{24}\text{NO}_3$   $[\text{M}+\text{H}]^+$  326.1751, found: 326.1756.

***tert*-Butyl (2-(2-oxo-3-(*o*-tolyl)propyl)phenyl)carbamate (2b):** white solid, mp 104-105 °C, 72% yield, new compound,  $R_f$  = 0.50 (hexanes/ethyl acetate 10/1).  $^1\text{H}$  NMR (400 MHz,  $\text{CDCl}_3$ )  $\delta$  7.76 (d,  $J$  = 8.0 Hz, 1H), 7.46 (brs, 1H), 7.28-7.22 (m, 2H), 7.22-7.14 (m, 3H), 7.12-7.08 (m, 1H), 7.04-6.94 (m, 2H), 3.82 (s, 2H), 3.71 (s, 2H), 2.09 (s, 3H), 1.50 (s, 9H);  $^{13}\text{C}$  NMR (100 MHz,  $\text{CDCl}_3$ )  $\delta$  207.7, 153.6, 137.5, 137.1, 132.2, 130.6, 130.6, 130.5, 128.3, 127.7, 126.4, 125.2, 124.3, 123.6, 80.3, 48.0, 45.8, 28.4, 19.4. HRMS Calculated for  $\text{C}_{21}\text{H}_{25}\text{KNO}_3$   $[\text{M}+\text{K}]^+$  378.1466, found: 378.1471.

***tert*-Butyl (2-(2-oxo-3-(*m*-tolyl)propyl)phenyl)carbamate (2c):** white solid, mp 109-110 °C, 48% yield, new compound,  $R_f$  = 0.50 (hexanes/ethyl acetate 10/1).  $^1\text{H}$  NMR (400 MHz,  $\text{CDCl}_3$ )  $\delta$  7.75 (d,  $J$  = 8.1 Hz, 1H), 7.37 (brs, 1H), 7.28-7.20 (m, 2H), 7.10 (d,  $J$  = 7.5 Hz, 1H), 7.05-7.95 (m, 4H), 3.77 (s, 2H), 3.71 (s, 2H), 2.33 (s, 3H), 1.50 (s, 9H);  $^{13}\text{C}$  NMR (100 MHz,  $\text{CDCl}_3$ )  $\delta$  207.7, 153.6, 138.6, 137.4,

133.2, 130.6, 130.3, 128.8, 128.2, 128.1, 126.6, 125.4, 124.3, 123.7, 80.3, 49.7, 45.7, 28.4, 21.4. HRMS Calculated for  $C_{21}H_{25}KNO_3$   $[M+H]^+$  378.1466, found: 378.1468.

**tert-Butyl (2-(2-oxo-3-(*p*-tolyl)propyl)phenyl)carbamate (2d):** white solid, mp 91-92 °C, 33% yield, new compound,  $R_f$  = 0.50 (hexanes/ethyl acetate 10/1).  $^1H$  NMR (400 MHz,  $CDCl_3$ )  $\delta$  7.75 (d,  $J$  = 8.1 Hz, 1H), 7.38 (brs, 1H), 7.28-7.22 (m, 1H), 7.14 (d,  $J$  = 7.8 Hz, 2H), 7.08-6.98 (m, 4H), 3.76 (s, 2H), 3.70 (s, 2H), 2.33 (s, 3H), 1.49 (s, 9H);  $^{13}C$  NMR (100 MHz,  $CDCl_3$ )  $\delta$  207.8, 153.6, 137.4, 137.0, 130.6, 130.2, 129.6, 129.4, 128.2, 125.5, 124.3, 123.7, 80.3, 49.4, 45.6, 28.4, 21.1. HRMS Calculated for  $C_{21}H_{25}KNO_3$   $[M+K]^+$  378.1466, found: 378.1463.

**tert-Butyl (2-(2-oxopropyl)phenyl)carbamate (2e):** white solid, mp 54-55 °C, 50% yield, new compound,  $R_f$  = 0.33 (hexanes/ethyl acetate 5/1).  $^1H$  NMR (400 MHz,  $CDCl_3$ )  $\delta$  7.77 (d,  $J$  = 8.0 Hz, 1H), 7.34-7.22 (m, 2H), 7.15 (d,  $J$  = 7.6 Hz, 1H), 7.06 (t,  $J$  = 7.4 Hz, 1H), 3.71 (s, 2H), 2.25 (s, 3H), 1.52 (s, 9H);  $^{13}C$  NMR (100 MHz,  $CDCl_3$ )  $\delta$  207.9, 153.6, 137.3, 130.6, 128.3, 125.4, 124.4, 123.6, 80.3, 47.7, 29.9, 28.4. HRMS Calculated for  $C_{14}H_{20}NO_3$   $[M+H]^+$  250.1438, found: 250.1442.

**tert-Butyl (2-(2-oxobutyl)phenyl)carbamate (2f):** pale yellow solid, mp 44-45 °C, 48% yield, new compound,  $R_f$  = 0.40 (hexanes/ethyl acetate 20/1).  $^1H$  NMR (400 MHz,  $CDCl_3$ )  $\delta$  7.78 (d,  $J$  = 8.1 Hz, 1H), 7.58 (brs, 1H), 7.29-7.23 (m, 1H), 7.14 (dd,  $J$  = 7.5, 1.2 Hz, 1H), 7.07-7.00 (m, 1H), 3.69 (s, 2H), 2.59 (q,  $J$  = 7.2 Hz, 2H), 1.52 (s, 9H), 1.04 (t,  $J$  = 7.2 Hz, 3H);  $^{13}C$  NMR (100 MHz,  $CDCl_3$ )  $\delta$  210.8, 153.6, 137.4, 130.5, 128.2, 125.6, 124.2, 123.5, 80.2, 46.5, 36.0, 28.4, 7.5. HRMS Calculated for  $C_{15}H_{21}NNaO_3$   $[M+Na]^+$  286.1414, found: 286.1412.

**tert-Butyl (2-(2-oxopentyl)phenyl)carbamate (2g):** pale red solid, mp 67-68 °C, 35% yield, new compound,  $R_f$  = 0.50 (hexanes/ethyl acetate 20/1).  $^1H$  NMR (400 MHz,  $CDCl_3$ )  $\delta$  7.78 (d,  $J$  = 8.1 Hz, 1H), 7.54 (brs, 1H), 7.29-7.23 (m, 1H), 7.17-7.12 (m, 1H), 7.04 (t,  $J$  = 7.4 Hz, 1H), 3.68 (s, 2H), 2.54 (t,  $J$  = 7.2 Hz, 2H), 1.63-1.57 (m, 2H), 1.52 (s, 9H), 0.88 (t,  $J$  = 7.4 Hz, 3H);  $^{13}C$  NMR (100 MHz,  $CDCl_3$ )  $\delta$  210.3, 153.6, 137.4, 130.5, 128.2, 125.5, 124.2, 123.5, 80.2, 46.9, 44.6, 28.4, 17.0, 13.5. HRMS Calculated for  $C_{16}H_{23}KNO_3$   $[M+K]^+$  316.1310, found: 316.1309.

**tert-Butyl (2-(3-methyl-2-oxobutyl)phenyl)carbamate (2h):** white solid, mp 73-74 °C, 58% yield, new compound,  $R_f$  = 0.55 (hexanes/ethyl acetate 5/1).  $^1H$  NMR (400 MHz,  $CDCl_3$ )  $\delta$  7.76 (d,  $J$  = 8.0 Hz, 1H), 7.65 (brs, 1H), 7.28-7.22 (m, 1H), 7.13 (d,  $J$  = 6.5 Hz, 1H), 7.06-7.01 (m, 1H), 3.75 (s, 2H), 2.86-2.74 (m, 1H), 1.52 (s, 9H), 1.14 (d,  $J$  = 6.9 Hz, 6H);  $^{13}C$  NMR (100 MHz,  $CDCl_3$ )  $\delta$  214.0, 153.6, 137.5, 130.5, 128.1, 126.0, 124.2, 123.7, 80.2, 44.6, 41.0, 28.4, 18.0. HRMS Calculated for  $C_{16}H_{24}NO_3$   $[M+H]^+$  278.1751, found: 278.1755.

**tert-Butyl (2-(2-oxohexyl)phenyl)carbamate (2i):** white solid, mp 51-52 °C, 50% yield, new compound,  $R_f$  = 0.60 (hexanes/ethyl acetate 5/1).  $^1H$  NMR (400 MHz,  $CDCl_3$ )  $\delta$  7.79 (d,  $J$  = 8.0 Hz, 1H), 7.55 (brs, 1H), 7.30-7.21 (m, 1H), 7.16-7.11 (m, 1H), 7.07-7.01 (m, 1H), 3.68 (s, 2H), 2.56 (t,  $J$  = 7.3 Hz, 2H), 1.63-1.48 (m, 2H; s, 9H), 1.33-1.22 (m, 2H), 0.88 (t,  $J$  = 7.3 Hz, 3H);  $^{13}C$  NMR (100 MHz,  $CDCl_3$ )  $\delta$  210.5, 153.6, 137.4, 130.5, 128.2, 125.4, 124.2, 123.4, 80.2, 46.9, 42.5, 28.4, 25.6, 22.2, 13.8. HRMS Calculated for  $C_{17}H_{26}NO_3$   $[M+H]^+$  292.1907, found: 292.1909.

**tert-Butyl (2-(2-oxoheptyl)phenyl)carbamate (2j):** white solid, mp 49-50 °C, 59% yield, new compound,  $R_f = 0.65$  (hexanes/ethyl acetate 5/1).  $^1\text{H}$  NMR (400 MHz,  $\text{CDCl}_3$ )  $\delta$  7.79 (d,  $J = 8.1$

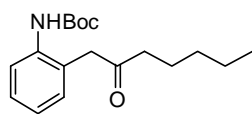

Hz, 1H), 7.56 (brs, 1H), 7.30-7.21 (m, 1H), 7.16-7.11 (m, 1H), 7.08-7.02 (m, 1H), 3.68 (s, 2H), 2.55 (t,  $J = 7.4$  Hz, 2H), 1.62-1.55 (m, 2H), 1.52 (s, 9H), 1.31-1.19 (m, 4H), 0.86 (t,  $J = 7.1$  Hz, 3H);  $^{13}\text{C}$  NMR (100 MHz,  $\text{CDCl}_3$ )  $\delta$  210.5, 153.6, 137.4, 130.5, 128.2, 125.4, 124.2, 123.4, 80.2, 46.9, 42.7, 31.2, 28.4, 23.2, 22.4, 13.9. HRMS Calculated for  $\text{C}_{18}\text{H}_{28}\text{NO}_3$   $[\text{M}+\text{H}]^+$  306.2064, found: 306.2062.

**tert-Butyl (2-methyl-6-(2-oxopropyl)phenyl)carbamate (2k):** white solid, mp 84-85 °C, 68% yield, new compound,  $R_f = 0.40$  (hexanes/ethyl acetate 5/1).  $^1\text{H}$  NMR (400 MHz,  $\text{CDCl}_3$ )  $\delta$  7.18-

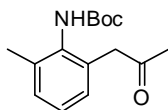

7.08 (m, 2H), 7.01 (d,  $J = 7.1$  Hz, 1H), 6.34 (brs, 1H), 3.72 (s, 2H), 2.27 (s, 3H), 2.19 (s, 3H), 1.48 (s, 9H);  $^{13}\text{C}$  NMR (100 MHz,  $\text{CDCl}_3$ )  $\delta$  207.1, 153.8, 136.9, 134.7, 132.4, 130.0, 128.2, 127.1, 80.0, 47.7, 29.9, 28.3, 18.4. HRMS Calculated for  $\text{C}_{15}\text{H}_{22}\text{NO}_3$   $[\text{M}+\text{H}]^+$  264.1594, found: 264.1594.

**tert-Butyl (2-methoxy-6-(2-oxopropyl)phenyl)carbamate (2l):** pale yellow oil, 69% yield, new compound,  $R_f = 0.40$  (hexanes/ethyl acetate 5/1).  $^1\text{H}$  NMR (400 MHz,  $\text{CDCl}_3$ )  $\delta$  7.16 (t,  $J =$

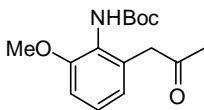

8.0 Hz, 1H), 6.87-6.76 (m, 2H), 6.09 (brs, 1H), 3.83 (s, 3H), 3.76 (s, 2H), 2.17 (s, 3H), 1.48 (s, 9H);  $^{13}\text{C}$  NMR (100 MHz,  $\text{CDCl}_3$ )  $\delta$  206.4, 154.5, 154.4, 133.3, 127.2, 125.2, 122.8, 110.0, 80.2, 55.7, 47.3, 29.8, 28.3. HRMS Calculated for  $\text{C}_{15}\text{H}_{21}\text{NNaO}_4$   $[\text{M}+\text{Na}]^+$  302.1363, found: 302.1359.

**tert-Butyl (4-methoxy-2-(2-oxopropyl)phenyl)carbamate (2m):** white solid, mp 82-83 °C, 70% yield, new compound,  $R_f = 0.35$  (hexanes/ethyl acetate 5/1).  $^1\text{H}$  NMR (400 MHz,  $\text{CDCl}_3$ )  $\delta$

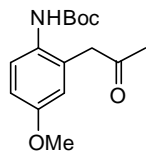

7.51 (d,  $J = 7.3$  Hz, 1H), 6.92-6.78 (m, 1H; brs, 1H), 6.69 (d,  $J = 2.9$  Hz, 1H), 3.77 (s, 3H), 3.68 (s, 2H), 2.23 (s, 3H), 1.50 (s, 9H);  $^{13}\text{C}$  NMR (100 MHz,  $\text{CDCl}_3$ )  $\delta$  207.3, 156.8, 154.1, 129.9, 128.8, 126.4, 116.2, 113.0, 80.1, 55.5, 47.6, 29.9, 28.4. HRMS Calculated for  $\text{C}_{15}\text{H}_{21}\text{KNO}_4$   $[\text{M}+\text{K}]^+$  318.1102, found: 318.1106.

**tert-Butyl (2,4-dimethyl-6-(2-oxopropyl)phenyl)carbamate (2n):** white solid, mp 81-82 °C, 64% yield, new compound,  $R_f = 0.50$  (hexanes/ethyl acetate 5/1).  $^1\text{H}$  NMR (400 MHz,  $\text{CDCl}_3$ )  $\delta$

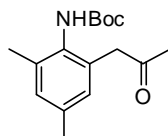

6.97 (s, 1H), 6.82 (s, 1H), 6.16 (brs, 1H), 3.69 (s, 2H), 2.27 (s, 3H), 2.23 (s, 3H), 2.20 (s, 3H), 1.48 (s, 9H);  $^{13}\text{C}$  NMR (100 MHz,  $\text{CDCl}_3$ )  $\delta$  207.2, 154.0, 136.7, 136.6, 132.3, 132.0, 130.6, 128.9, 79.7, 47.6, 29.7, 28.3, 20.9, 18.2. HRMS Calculated for  $\text{C}_{16}\text{H}_{24}\text{NO}_3$   $[\text{M}+\text{H}]^+$  278.1751, found: 278.1752.

**tert-Butyl (2-(2-oxo-2-phenylethyl)phenyl)carbamate (2o):** white solid, 69% yield, known compound,<sup>[1]</sup>  $R_f = 0.50$  (hexanes/ethyl acetate 10/1).  $^1\text{H}$  NMR (400 MHz,  $\text{CDCl}_3$ )  $\delta$  8.09 (dd,  $J =$

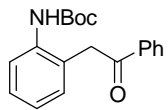

5.2, 3.3 Hz, 2H), 7.79 (d,  $J = 7.9$  Hz, 1H), 7.71-7.58 (m, 2H), 7.53 (dd,  $J = 10.5$ , 4.7 Hz, 2H), 7.31-7.26 (m, 1H), 7.23 (dd,  $J = 7.6$ , 1.3 Hz, 1H), 7.07 (td,  $J = 7.5$ , 1.2 Hz, 1H), 4.31 (s, 2H), 1.54 (s, 9H);  $^{13}\text{C}$  NMR (100 MHz,  $\text{CDCl}_3$ )  $\delta$  199.1, 153.7, 137.6, 136.2, 133.8, 130.7, 128.8, 128.1, 124.4, 80.3, 42.0, 28.4.

### 3. Asymmetric Hydrogenation of *in situ* Generated Indoles

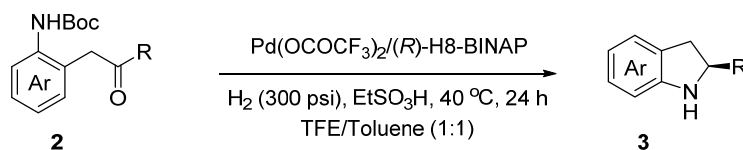

Ligand (*R*)-H8-BINAP (4.8 mg, 0.0076 mmol) and Pd(OCOCF<sub>3</sub>)<sub>2</sub> (2.1 mg, 0.0063 mmol) were placed in a dried Schlenk tube under nitrogen atmosphere, and degassed anhydrous acetone was added. The mixture was stirred at room temperature for one hour. The solvent was removed under vacuum to give the catalyst. This catalyst was taken into a glove box filled with nitrogen and dissolved in 2,2,2-trifluoroethanol (2 mL). To the mixture of compounds **2** (0.25 mmol) and ethanesulfonic acid (41  $\mu$ L, 0.50 mmol) in toluene (2 mL), this catalyst solution was added, and then the mixture was transferred to an autoclave, which was charged hydrogen gas (300 psi). The autoclave was stirred at 40  $^\circ$ C for 24 h. After release of the hydrogen, the autoclave was opened and the reaction mixture was evaporated. Then, saturated sodium hydrogencarbonate (5 mL) was added. The mixture was extracted with dichloromethane (5 mL $\times$ 3), the combined organic layer was dried over sodium sulfate and concentrated in *vacuo*. Purification was performed on silica gel using ethyl acetate/hexanes as the eluent to give the chiral products **3**.

Racemates of **3** were prepared using ( $\pm$ )-BINAP/Pd(OCOCF<sub>3</sub>)<sub>2</sub> as racemic catalyst.

**(+)-(R)-2-Benzylindoline (3a):** 51 mg, 98% yield, colorless oil, known compound, *R*<sub>f</sub> = 0.65 (hexanes/ethyl acetate 10/1), 95% ee,  $[\alpha]_D^{20} = +95.09$  (*c* 1.02, CHCl<sub>3</sub>), [lit.<sup>[4]</sup>:  $[\alpha]_D^{RT} = +80.2$  (*c* 1.00, CHCl<sub>3</sub>) for 95% e.e.]; <sup>1</sup>H NMR (400 MHz, CDCl<sub>3</sub>)  $\delta$  7.36-7.29 (m, 2H), 7.28-7.20 (m, 3H), 7.07 (d, *J* = 7.3 Hz, 1H), 7.03-6.97 (m, 1H), 6.71-6.65 (m, 1H), 6.55 (d, *J* = 7.7 Hz, 1H), 4.12-4.02 (m, 1H), 3.81 (brs, 1H), 3.18-3.08 (m, 1H), 2.94-2.73 (m, 3H); <sup>13</sup>C NMR (100 MHz, CDCl<sub>3</sub>)  $\delta$  150.6, 139.1, 129.2, 128.7, 128.4, 127.4, 126.5, 124.8, 118.6, 109.1, 61.0, 42.7, 36.0. HPLC (OD-H, elute: *n*-hexane/*i*-PrOH = 99/1, detector: 254 nm, 30  $^\circ$ C, flow rate: 1.0 mL/min), *t*<sub>1</sub> = 14.8 min (maj), *t*<sub>2</sub> = 16.6 min.

**(+)-(R)-2-(2-Methylbenzyl)indoline (3b):** 51 mg, 91% yield, colorless oil, known compound, *R*<sub>f</sub> = 0.60 (hexanes/ethyl acetate 20/1), 94% ee,  $[\alpha]_D^{20} = +90.49$  (*c* 1.00, CHCl<sub>3</sub>), [lit.<sup>[4]</sup>:  $[\alpha]_D^{RT} = +74.8$  (*c* 1.50, CHCl<sub>3</sub>) for 94% ee]; <sup>1</sup>H NMR (400 MHz, CDCl<sub>3</sub>)  $\delta$  7.19-7.12 (m, 4H), 7.08 (d, *J* = 7.2 Hz, 1H), 7.00 (t, *J* = 7.6 Hz, 1H), 6.71-6.67 (m, 1H), 6.54 (d, *J* = 7.7 Hz, 1H), 4.14-4.01 (m, 1H), 3.54 (brs, 1H), 3.13 (dd, *J* = 15.5, 8.4 Hz, 1H), 2.93-2.75 (m, 3H), 2.32 (s, 3H); <sup>13</sup>C NMR (100 MHz, CDCl<sub>3</sub>)  $\delta$  150.6, 137.3, 136.6, 130.6, 129.8, 128.4, 127.4, 126.6, 126.1, 124.9, 118.6, 109.2, 59.7, 39.7, 36.1, 19.7. HPLC (OD-H, elute: *n*-hexane/*i*-PrOH = 99/1, detector: 254 nm, 30  $^\circ$ C, flow rate: 1.0 mL/min), *t*<sub>1</sub> = 13.8 min (maj), *t*<sub>2</sub> = 15.7 min.

**(+)-(R)-2-(3-Methylbenzyl)indoline (3c):** 50 mg, 90% yield, colorless oil, known compound, *R*<sub>f</sub> = 0.55 (hexanes/ethyl acetate 20/1). 95% ee,  $[\alpha]_D^{20} = +86.69$  (*c* 1.00, CHCl<sub>3</sub>), [lit.<sup>[4]</sup>:  $[\alpha]_D^{20} = +75.4$  (*c* 1.60, CHCl<sub>3</sub>) for 94% e.e.]; <sup>1</sup>H NMR (400 MHz, CDCl<sub>3</sub>)  $\delta$  7.22-7.16 (m, 1H), 7.10-7.95 (m, 5H), 6.70-6.65 (m, 1H), 6.54 (d, *J* = 7.7 Hz, 1H), 4.10-3.99 (m, 1H), 3.57 (brs, 1H), 3.16-3.07 (m, 1H), 2.88-2.72 (m, 3H), 2.34 (s, 3H); <sup>13</sup>C NMR (100 MHz, CDCl<sub>3</sub>)  $\delta$  150.6, 139.1, 138.3, 130.0, 128.6, 128.5, 127.4, 127.2, 126.2, 124.9, 118.6, 109.2, 61.0, 42.7, 36.0, 21.5. HPLC (OD-H,

elute: *n*-hexane/*i*-PrOH = 99/1, detector: 254 nm, 30 °C, flow rate: 1.0 mL/min), t<sub>1</sub> = 11.6 min (maj), t<sub>2</sub> = 12.9 min.

**(+)-(R)-2-(4-Methylbenzyl)indoline (3d):** 52 mg, 93% yield, colorless oil, known compound, R<sub>f</sub> = 0.50 (hexanes/ethyl acetate 20/1). 95% ee, [α]<sub>D</sub><sup>20</sup> = +87.95 (c 0.98, CHCl<sub>3</sub>), [lit.<sup>[4]</sup>: [α]<sub>D</sub><sup>RT</sup> = +75.5 (c 1.50, CHCl<sub>3</sub>) for 93% ee]; <sup>1</sup>H NMR (400 MHz, CDCl<sub>3</sub>) δ 7.16-7.04 (m, 5H), 6.99 (t, *J* = 7.6 Hz, 1H), 6.70-6.65 (m, 1H), 6.54 (d, *J* = 7.7 Hz, 1H), 4.10-3.99 (m, 1H), 3.71 (brs, 1H), 3.16-3.06 (m, 1H), 2.89-2.73 (m, 3H), 2.33 (s, 3H); <sup>13</sup>C NMR (100 MHz, CDCl<sub>3</sub>) δ 150.6, 136.0, 136.0, 129.4, 129.0, 128.5, 127.4, 124.9, 118.5, 109.1, 61.1, 42.3, 35.9, 21.1. HPLC (OD-H, elute: *n*-hexane/*i*-PrOH = 99/1, detector: 254 nm, 30 °C, flow rate: 1.0 mL/min), t<sub>1</sub> = 11.6 min (maj), t<sub>2</sub> = 12.9 min.

**(+)-(R)-2-Methylindoline (3e):** 32 mg, 96% yield, colorless oil, known compound, R<sub>f</sub> = 0.75 (hexanes/ethyl acetate 10/1). 90% ee, [α]<sub>D</sub><sup>20</sup> = +3.98 (c 0.56, benzene), [lit.<sup>[4]</sup>: [α]<sub>D</sub><sup>RT</sup> = +6.96 (c 0.63, benzene) for 91% ee]; <sup>1</sup>H NMR (400 MHz, CDCl<sub>3</sub>) δ 7.06 (d, *J* = 7.1 Hz, 1H), 7.00 (t, *J* = 7.5 Hz, 1H), 6.71-6.65 (m, 1H), 6.59 (d, *J* = 7.7 Hz, 1H), 4.05-3.92 (m, 1H), 3.67 (brs, 1H), 3.18-3.07 (m, 1H), 2.67-2.59 (m, 1H), 1.27 (d, *J* = 6.2 Hz, 3H); <sup>13</sup>C NMR (100 MHz, CDCl<sub>3</sub>) δ 151.0, 128.9, 127.3, 124.7, 118.6, 109.2, 55.2, 37.8, 22.3. HPLC (OD-H, elute: *n*-hexane/*i*-PrOH = 97/3, detector: 254 nm, 30 °C, flow rate: 0.8 mL/min), t<sub>1</sub> = 11.0 min (maj), t<sub>2</sub> = 12.5 min.

**(+)-(R)-2-Ethylindoline (3f):** 30 mg, 82% yield, colorless oil, known compound, R<sub>f</sub> = 0.60 (hexanes/ethyl acetate 20/1). 94% ee, [α]<sub>D</sub><sup>20</sup> = +5.88 (c 0.34, CHCl<sub>3</sub>), [lit.<sup>[5]</sup>: [α]<sub>D</sub><sup>22</sup> = -5.5 (c 0.2, CHCl<sub>3</sub>) for 97% ee]; <sup>1</sup>H NMR (400 MHz, CDCl<sub>3</sub>) δ 7.06 (d, *J* = 7.2 Hz, 1H), 6.99 (t, *J* = 7.6 Hz, 1H), 6.67 (t, *J* = 7.2 Hz, 1H), 6.59 (d, *J* = 7.7 Hz, 1H), 3.81-3.72 (m, 1H), 3.45-3.05 (m, 1H; brs, 1H), 2.72-2.62 (m, 1H), 1.68-1.56 (m, 2H), 0.96 (t, *J* = 7.4 Hz, 3H); <sup>13</sup>C NMR (100 MHz, CDCl<sub>3</sub>) δ 151.0, 128.9, 127.2, 124.7, 118.4, 109.1, 61.5, 35.8, 29.6, 10.7. HPLC (OD-H, elute: *n*-hexane/*i*-PrOH = 95/5, detector: 254 nm, 30 °C, flow rate: 1.0 mL/min), t<sub>1</sub> = 8.0 min (maj), t<sub>2</sub> = 9.0 min.

**(+)-(R)-2-Propylindoline (3g):** 34 mg, 84% yield, colorless oil, known compound, R<sub>f</sub> = 0.60 (hexanes/ethyl acetate 20/1). 94% ee, [α]<sub>D</sub><sup>20</sup> = +11.50 (c 0.40, CHCl<sub>3</sub>), [lit.<sup>[6]</sup>: [α]<sub>D</sub><sup>25</sup> = +9.3 (c 0.3, CHCl<sub>3</sub>) for 96% e.e.]; <sup>1</sup>H NMR (400 MHz, CDCl<sub>3</sub>) δ 7.06 (d, *J* = 7.2 Hz, 1H), 6.99 (t, *J* = 7.6 Hz, 1H), 6.67 (t, *J* = 7.3 Hz, 1H), 6.59 (d, *J* = 7.7 Hz, 1H), 3.91-3.79 (m, 1H), 3.47-3.05 (m, 1H; brs, 1H), 2.71-2.62 (m, 1H), 1.65-1.51 (m, 2H), 1.47-1.34 (m, 2H), 0.96 (t, *J* = 7.3 Hz, 3H); <sup>13</sup>C NMR (100 MHz, CDCl<sub>3</sub>) δ 151.0, 128.9, 127.2, 124.7, 118.5, 109.1, 59.8, 39.1, 36.2, 19.8, 14.2. HPLC (OD-H, elute: *n*-hexane/*i*-PrOH = 95/5, detector: 254 nm, 30 °C, flow rate: 1.0 mL/min), t<sub>1</sub> = 7.7 min (maj), t<sub>2</sub> = 9.2 min.

**(+)-(S)-2-Isopropylindoline (3h):** 38 mg, 94% yield, colorless oil, known compound,<sup>[7]</sup> R<sub>f</sub> = 0.80 (hexanes/ethyl acetate 10/1). 96% ee, [α]<sub>D</sub><sup>20</sup> = -12.86 (c 0.70, CHCl<sub>3</sub>), <sup>1</sup>H NMR (400 MHz, CDCl<sub>3</sub>) δ 7.04 (d, *J* = 7.2 Hz, 1H), 6.98 (t, *J* = 7.6 Hz, 1H), 6.65 (t, *J* = 7.4 Hz, 1H), 6.57 (d, *J* = 7.7 Hz, 1H), 3.95-3.50 (m, 1H; brs, 1H), 3.10-3.00 (m, 1H), 2.76-2.66 (m, 1H), 1.80-1.70 (m, 1H), 0.98 (d, *J* = 6.6 Hz, 3H), 0.93 (d, *J* = 6.7 Hz, 3H); <sup>13</sup>C NMR (100 MHz, CDCl<sub>3</sub>) δ 151.4, 129.2, 127.2, 124.5, 118.3, 108.8, 66.6, 34.2, 34.0, 19.6, 19.1. HPLC (OD-H, elute: *n*-hexane/*i*-PrOH = 99/1, detector: 254 nm, 30 °C, flow rate: 1.0 mL/min), t<sub>1</sub> = 10.7 min (maj), t<sub>2</sub> = 17.5 min.

**(+)-(R)-2-Butylindoline (3i):** 43 mg, 98% yield, colorless oil, known compound,  $R_f = 0.85$  (hexanes/ethyl acetate 10/1). 94% ee,  $[\alpha]_D^{20} = +16.28$  ( $c$  0.86,  $\text{CHCl}_3$ ), [lit.<sup>[4]</sup>:  $[\alpha]_D^{\text{RT}} = +12.6$  ( $c$  1.1,  $\text{CHCl}_3$ ) for 93% e.e.];  $^1\text{H}$  NMR (400 MHz,  $\text{CDCl}_3$ )  $\delta$  7.05 (d,  $J = 7.2$  Hz, 1H), 6.99 (t,  $J = 7.6$  Hz, 1H), 6.67 (t,  $J = 7.4$  Hz, 1H), 6.59 (d,  $J = 7.7$  Hz, 1H), 4.01-3.63 (m, 1H; brs, 1H), 3.16-3.06 (m, 1H), 2.70-2.62 (m, 1H), 1.66-1.54 (m, 2H), 1.41-1.30 (m, 4H), 0.92 (t,  $J = 6.9$  Hz, 3H);  $^{13}\text{C}$  NMR (100 MHz,  $\text{CDCl}_3$ )  $\delta$  151.0, 128.9, 127.2, 124.7, 118.4, 109.1, 60.1, 36.6, 36.2, 28.8, 22.8, 14.1. HPLC (OD-H, elute: *n*-hexane/*i*-PrOH = 99/1, detector: 254 nm, 30 °C, flow rate: 1.0 mL/min),  $t_1 = 9.5$  min (maj),  $t_2 = 13.1$  min.

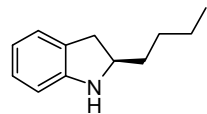

**(+)-(R)-2-Pentylindoline (3j):** 46 mg, 97% yield, colorless oil, known compound,  $R_f = 0.85$  (hexanes/ethyl acetate 10/1). 93% ee,  $[\alpha]_D^{20} = +15.87$  ( $c$  0.92,  $\text{CHCl}_3$ ), [lit.<sup>[4]</sup>:  $[\alpha]_D^{\text{RT}} = +15.5$  ( $c$  1.40,  $\text{CHCl}_3$ ) for 92% ee];  $^1\text{H}$  NMR (400 MHz,  $\text{CDCl}_3$ )  $\delta$  7.08-6.96 (m, 2H), 6.69-6.56 (m, 2H), 4.10-3.3.54 (m, 1H; brs, 1H), 3.15-3.05 (m, 1H), 2.70-2.60 (m, 1H), 1.66-1.52 (m, 2H), 1.47-1.24 (m, 6H), 0.90 (t,  $J = 6.9$  Hz, 3H);  $^{13}\text{C}$  NMR (100 MHz,  $\text{CDCl}_3$ )  $\delta$  151.0, 128.9, 127.2, 124.6, 118.4, 109.1, 60.1, 36.8, 36.2, 31.9, 26.3, 22.7, 14.0. HPLC (OD-H, elute: *n*-hexane/*i*-PrOH = 99/1, detector: 254 nm, 30 °C, flow rate: 1.0 mL/min),  $t_1 = 9.6$  min (maj),  $t_2 = 12.4$  min.

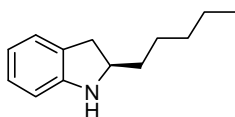

**(+)-(R)-2,7-Dimethylindoline (3k):** 35 mg, 94% yield, colorless oil, known compound,  $R_f = 0.65$  (hexanes/ethyl acetate 10/1). 96% ee,  $[\alpha]_D^{20} = +8.12$  ( $c$  0.48,  $\text{CHCl}_3$ ),  $^1\text{H}$  NMR (400 MHz,  $\text{CDCl}_3$ )  $\delta$  6.96-6.82 (m, 2H), 6.63 (t,  $J = 7.4$  Hz, 1H), 4.05-3.92 (m, 1H), 3.50 (brs, 1H), 3.20-3.10 (m, 1H), 2.70-2.60 (m, 1H), 2.12 (s, 3H), 1.30 (d,  $J = 6.2$  Hz, 3H);  $^{13}\text{C}$  NMR (100 MHz,  $\text{CDCl}_3$ )  $\delta$  149.6, 128.3, 128.2, 122.2, 118.7, 118.6, 55.2, 38.1, 22.5, 16.9. HPLC (OD-H, elute: *n*-hexane/*i*-PrOH = 99/1, detector: 254 nm, 30 °C, flow rate: 1.0 mL/min),  $t_1 = 11.1$  min,  $t_2 = 12.4$  min (maj).

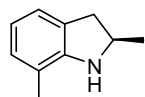

**(+)-(R)-7-Methoxy-2-methylindoline (3l):** 37 mg, 91% yield, colorless oil, new compound,  $R_f = 0.40$  (hexanes/ethyl acetate 20/1). 80% ee,  $[\alpha]_D^{20} = +8.09$  ( $c$  0.68,  $\text{CHCl}_3$ ),  $^1\text{H}$  NMR (400 MHz,  $\text{CDCl}_3$ )  $\delta$  6.74 (d,  $J = 7.0$  Hz, 1H), 6.71-6.61 (m, 2H), 4.07-3.96 (m, 1H), 3.81 (s, 3H), 3.59 (brs, 1H), 3.20-3.12 (m, 1H), 2.70-2.62 (m, 1H), 1.30 (d,  $J = 6.2$  Hz, 3H);  $^{13}\text{C}$  NMR (100 MHz,  $\text{CDCl}_3$ )  $\delta$  145.2, 139.9, 129.9, 119.1, 117.3, 109.2, 55.7, 55.3, 38.4, 22.3. HPLC (OD-H, elute: *n*-hexane/*i*-PrOH = 99/1, detector: 254 nm, 30 °C, flow rate: 1.0 mL/min),  $t_1 = 13.9$  min,  $t_2 = 16.6$  min (maj). HRMS Calculated for  $\text{C}_{10}\text{H}_{14}\text{NO}$   $[\text{M}+\text{H}]^+$  164.1070, found: 164.1072.

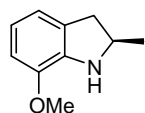

**(+)-(R)-5-Methoxy-2-methylindoline (3m):** 33 mg, 81% yield, yellow oil, known compound,  $R_f = 0.20$  (hexanes/ethyl acetate 20/1). 84% ee,  $[\alpha]_D^{20} = +7.00$  ( $c$  0.60,  $\text{CHCl}_3$ ), [lit.<sup>[6]</sup>:  $[\alpha]_D^{25} = +10.2$  ( $c$  0.50,  $\text{CHCl}_3$ ) for 95% ee];  $^1\text{H}$  NMR (400 MHz,  $\text{CDCl}_3$ )  $\delta$  6.71 (s, 1H), 6.61-6.51 (m, 2H), 4.02-3.91 (m, 1H), 3.73 (s, 3H), 3.21 (brs, 1H), 3.14-3.06 (m, 1H), 2.66-2.56 (m, 1H), 1.28 (d,  $J = 6.2$  Hz, 3H);  $^{13}\text{C}$  NMR (100 MHz,  $\text{CDCl}_3$ )  $\delta$  153.5, 144.7, 130.8, 112.1, 111.7, 109.9, 56.0, 55.7, 38.3, 22.2. HPLC (OD-H, elute: *n*-hexane/*i*-PrOH = 95/5, detector: 254 nm, 30 °C, flow rate: 1.0 mL/min),  $t_1 = 9.2$  min (maj),  $t_2 = 18.4$  min.

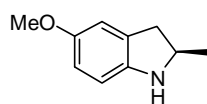

**(+)-(R)-2,5,7-Trimethylindoline (3n):** 36 mg, 90% yield, colorless oil, new compound,  $R_f = 0.70$  (hexanes/ethyl acetate 10/1). 94% ee,  $[\alpha]_D^{20} = +10.48$  ( $c$  0.42,  $\text{CHCl}_3$ ),  $^1\text{H}$  NMR (400 MHz,  $\text{CDCl}_3$ )  $\delta$  6.76 (s, 1H), 6.67 (s, 1H), 4.02-3.89 (m, 1H), 3.35 (brs, 1H), 3.15-3.05 (m, 1H),

2.65-2.55 (m, 1H), 2.22 (s, 3H), 2.09 (s, 3H), 1.29 (d,  $J = 6.2$  Hz, 3H);  $^{13}\text{C}$  NMR (100 MHz,  $\text{CDCl}_3$ )  $\delta$  147.2, 128.8, 128.7, 128.2, 122.9, 118.6, 55.4, 38.2, 22.4, 20.8, 16.8. HPLC (OD-H, elute: *n*-hexane/ *i*-PrOH = 99/1, detector: 254 nm, 30 °C, flow rate: 1.0 mL/min),  $t_1 = 7.3$  min,  $t_2 = 8.1$  min (maj). HRMS Calculated for  $\text{C}_{11}\text{H}_{16}\text{N}$   $[\text{M}+\text{H}]^+$  162.1277, found: 162.1282.

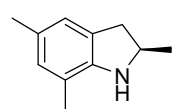

**(-)-(S)-2-Phenylindoline (3o):** 27 mg, 55% yield, white solid, known compound,  $R_f = 0.70$  (hexanes/ethyl acetate 10/1). 68% ee,  $[\alpha]_D^{20} = -45.9$  (c 0.54,  $\text{CHCl}_3$ ), [lit.<sup>[8]</sup>:  $[\alpha]_D^{25} = -80.1$  (c 1.0,  $\text{CHCl}_3$ ) for > 99% ee of the (*S*)-enantiomer];  $^1\text{H}$  NMR (400 MHz,  $\text{CDCl}_3$ )  $\delta$  7.37-7.31 (m, 2H), 7.29-7.22 (m, 2H), 7.22-7.16 (m, 1H), 7.00 (dd,  $J = 12.6, 7.3$  Hz, 2H), 6.68 (t,  $J = 7.3$  Hz, 1H), 6.61 (d,  $J = 7.7$  Hz, 1H), 4.88 (t,  $J = 9.0$  Hz, 1H), 3.60 (br, 1H), 3.36 (dd,  $J = 15.6, 9.2$  Hz, 1H), 2.92 (dd,  $J = 15.6, 8.8$  Hz, 1H);  $^{13}\text{C}$  NMR (100 MHz,  $\text{CDCl}_3$ )  $\delta$  150.6, 144.5, 128.8, 128.5, 127.8, 127.7, 126.5, 124.8, 119.1, 109.5, 63.7, 39.7. HPLC (OD-H, elute: *n*-hexane/*i*-PrOH = 90/10, detector: 254 nm, 30 °C, flow rate: 1.0 mL/min),  $t_1 = 12.7$  min (maj),  $t_2 = 21.3$  min.

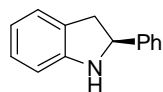

#### 4. The Mechanistic Investigation

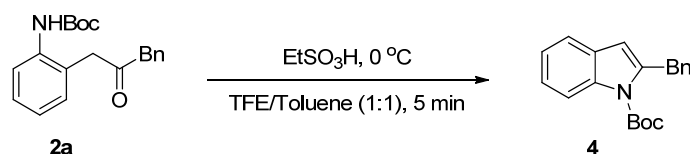

Under nitrogen, to a solution of compound **2a** (32 mg, 0.1 mmol) in 2,2,2-trifluoroethanol/toluene (1 mL/1 mL) was added ethanesulfonic acid (16  $\mu\text{L}$ , 0.2 mmol). After stirring for five minutes, the mixture was quenched with saturated sodium hydrogencarbonate (5 mL). Then the mixture was extracted with ethyl acetate (5 mL $\times$ 3), the combined organic layer was washed with brine, dried over anhydrous sodium sulfate, and concentrated in *vacuo*. The residue was purified by flash chromatography to give *tert*-butyl 2-benzyl-1*H*-indole-1-carboxylate **4** (24 mg, 78% yield, colorless oil, known compound,<sup>[1]</sup>  $R_f = 0.80$  (hexanes/ethyl acetate 20/1).  $^1\text{H}$  NMR (400 MHz,  $\text{CDCl}_3$ )  $\delta$  8.04 (d,  $J = 8.4$  Hz, 1H), 7.35-7.30 (m, 1H), 7.26-7.20 (m, 2H), 7.19-7.07 (m, 5H), 6.05 (d,  $J = 0.5$  Hz, 1H), 4.29 (s, 2H), 1.49 (s, 9H);  $^{13}\text{C}$  NMR (100 MHz,  $\text{CDCl}_3$ )  $\delta$  150.5, 140.5, 139.2, 136.9, 129.1, 129.0, 128.4, 126.3, 123.5, 122.7, 119.9, 115.6, 109.3, 83.9, 36.4, 28.1.

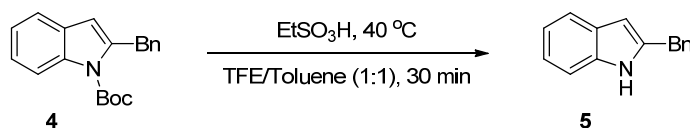

Under nitrogen, to a solution of compound **4** (46 mg, 0.15 mmol) in 2,2,2-trifluoroethanol/toluene (2 mL/2 mL) was added ethanesulfonic acid (24  $\mu\text{L}$ , 0.30 mmol). After stirring for thirty minutes, the mixture was quenched with saturated sodium hydrogencarbonate (5 mL). Then the mixture was extracted with ethyl acetate (10 mL $\times$ 3), the combined organic layer was washed with brine, dried over sodium sulfate, and concentrated in *vacuo*. The residue was purified by flash chromatography to give the 2-benzyl-1*H*-indole **5** (30 mg, 97% yield, pale yellow solid, known compound,<sup>[6]</sup>  $R_f = 0.70$  (hexanes/ethyl acetate 20/1).  $^1\text{H}$  NMR (400 MHz,  $\text{CDCl}_3$ )  $\delta$  7.70 (brs, 1H), 7.53 (d,  $J = 7.6$  Hz, 1H), 7.34-7.28 (m, 2H), 7.26-7.19 (m, 4H), 7.12-7.03 (m, 2H), 6.30 (d,  $J = 0.6$  Hz, 1H), 4.09 (s, 2H).  $^{13}\text{C}$  NMR (100 MHz,  $\text{CDCl}_3$ )  $\delta$  138.6, 137.8, 136.3, 128.9, 128.8, 128.7, 126.8, 121.4, 120.0, 119.8, 110.5, 101.2, 34.8.



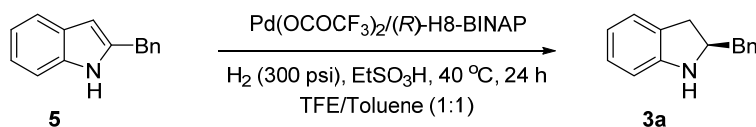

Ligand (*R*)-H8-BINAP (4.8 mg, 0.0076 mmol) and Pd(OCOCF<sub>3</sub>)<sub>2</sub> (2.1 mg, 0.0063 mmol) were placed in a dried Schlenk tube under nitrogen atmosphere, and degassed anhydrous acetone was added. The mixture was stirred at room temperature for one hour. The solvent was removed under vacuum to give the catalyst. This catalyst was taken into a glove box filled with nitrogen and dissolved in 2,2,2-trifluoroethanol (2.0 mL). To the mixture of compound **5** (51.8 mg, 0.25 mmol) and ethanesulfonic acid (41 μL, 0.50 mmol) in toluene (2 mL), this catalyst solution was added, and then the mixture was transferred to an autoclave, which was charged hydrogen gas (300 psi). The autoclave was stirred at 40 °C for 24 h. After release of the hydrogen, the autoclave was opened and the reaction mixture was evaporated. Purification was performed on silica gel using hexanes/ethyl acetate (20:1) as the eluent to give chiral products **3a** (51 mg, 98% yield, 95% ee).

## 5. The Scale-up Experiment

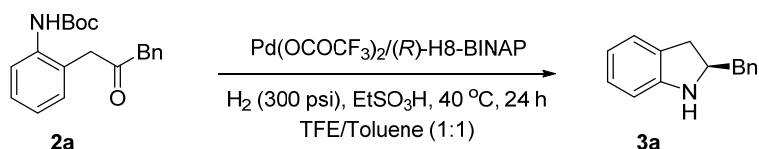

Ligand (*R*)-H8-BINAP (47.9 mg, 0.076 mmol) and Pd(OCOCF<sub>3</sub>)<sub>2</sub> (20.9 mg, 0.063 mmol) were placed in a dried Schlenk tube under nitrogen atmosphere, and degassed anhydrous acetone was added. The mixture was stirred at room temperature for one hour. The solvent was removed under vacuum to give the catalyst. This catalyst was taken into a glove box filled with nitrogen and dissolved in 2,2,2-trifluoroethanol (10 mL). To the mixture of compound **2a** (814 mg, 2.5 mmol) and ethanesulfonic acid (0.41 mL, 5 mmol) in toluene (10 mL), this catalyst solution was added, and then the mixture was transferred to an autoclave, which was charged hydrogen gas (300 psi). The autoclave was stirred at 40 °C for 24 h. After release of the hydrogen, the autoclave was opened and the reaction mixture was evaporated. Then, saturated sodium hydrogencarbonate (10 mL) was added. The mixture was extracted with dichloromethane (10 mL×3), and the combined organic layer was dried over anhydrous sodium sulfate and concentrated in *vacuo*. Purification was performed on silica gel using ethyl acetate/hexanes (10:1) as the eluent to give chiral product **3a** (477 mg, 91% yield, 94% ee).

## 6. References

1. Clark, R. D.; Muchowski, J. M.; Fisher, L. E.; Flippin, L. A.; Repke, D. B.; Souchet, M. *Synthesis* **1991**, 871.
2. Burke, B. J.; Overman, L. E. *J. Am. Chem. Soc.* **2004**, *126*, 16820.
3. Chanthamath, S.; Takaki, S.; Shibatomi, K.; Iwasa, S. *Angew. Chem. Int. Ed.* **2013**, *52*, 5818.
4. Wang, D.-S.; Chen, Q.-A.; Li, W.; Yu, C.-B.; Zhou, Y.-G.; Zhang, X. *J. Am. Chem. Soc.* **2010**, *132*, 8909.
5. Wen, J.; Fan, X.; Tan, R.; Chien, H.-C.; Zhou, Q.; Chung, L. W.; Zhang, X. *Org. Lett.* **2018**, *20*, 2143.
6. Yang, Z.; Chen, F.; He, Y.; Yang, N.; Fan, Q.-H. *Angew. Chem. Int. Ed.* **2016**, *55*, 13863.
7. Hou, X. L.; Zheng, B. H. *Org. Lett.* **2009**, *11*, 1789.
8. Saito, K.; Shibata, Y.; Yamanaka, M.; Akiyama, T. *J. Am. Chem. Soc.* **2013**, *135*, 11740.

## 7. Copy of NMR, HPLC for Compounds

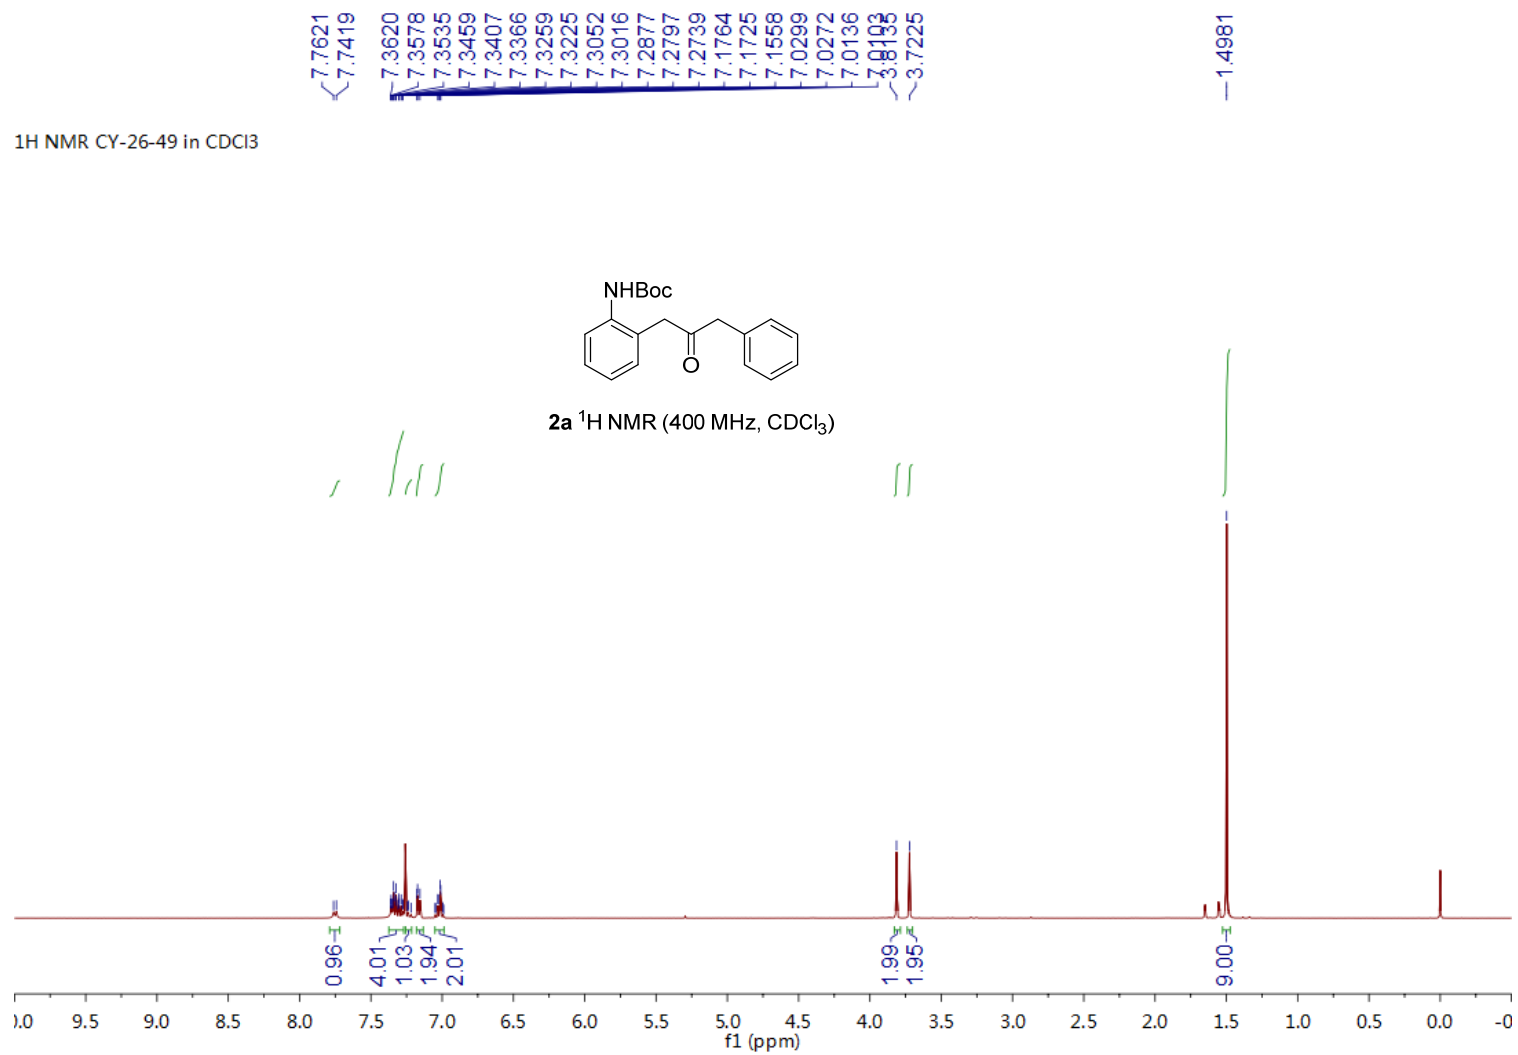

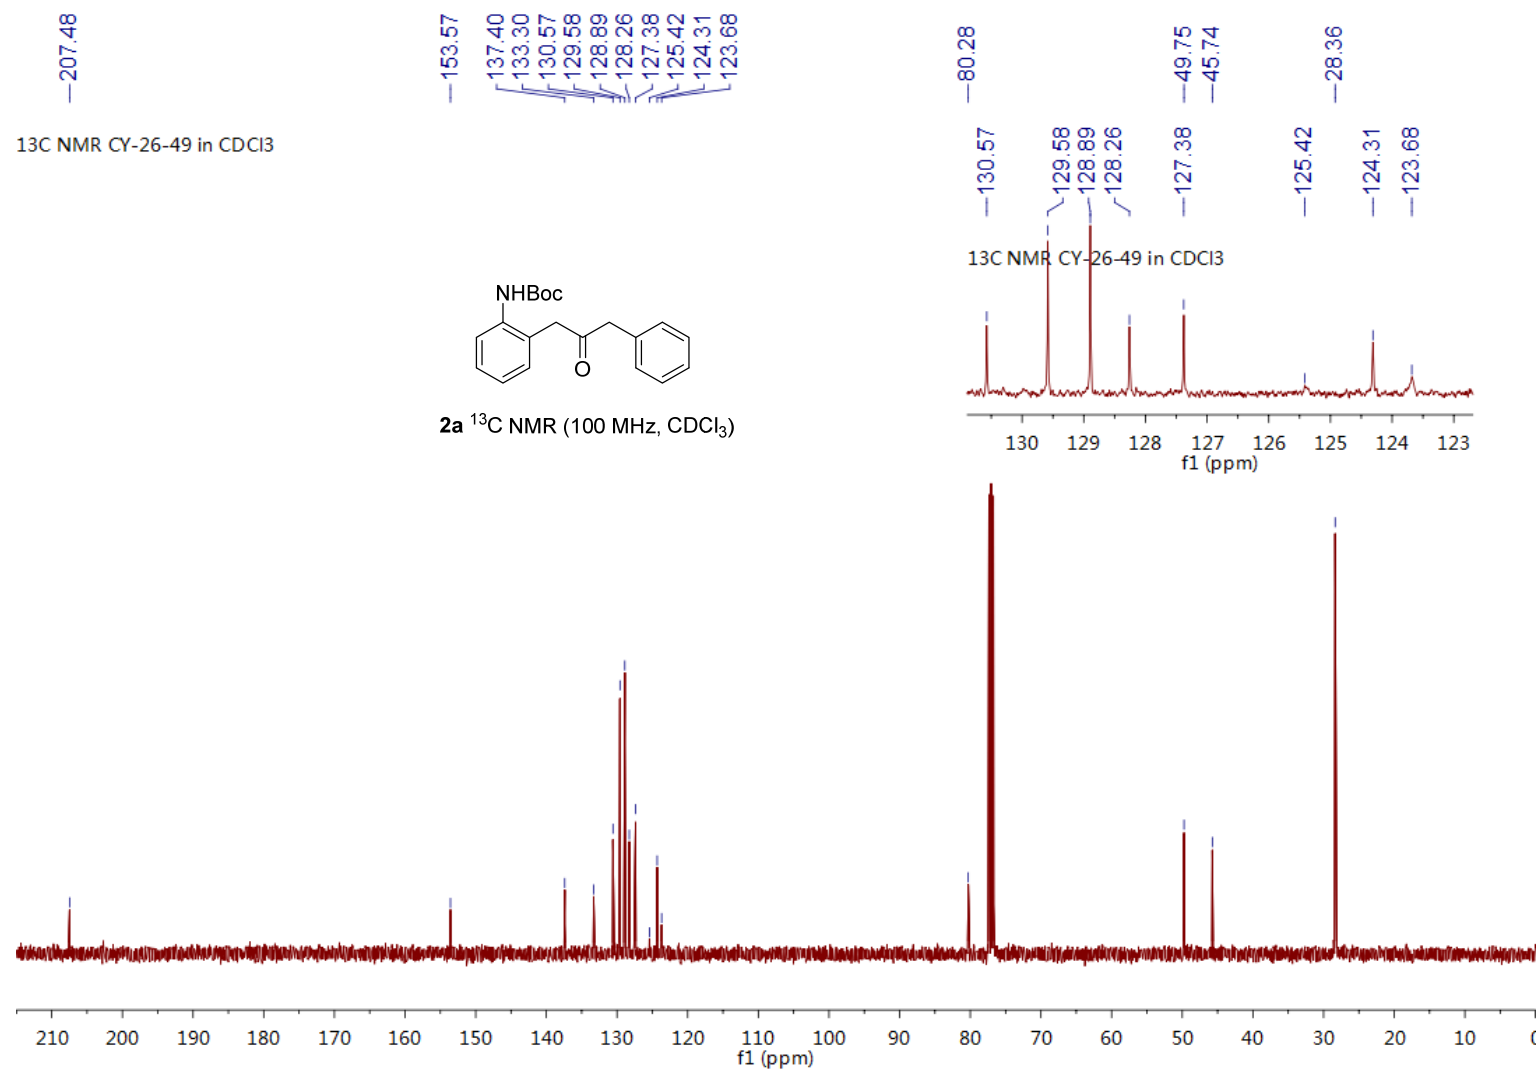

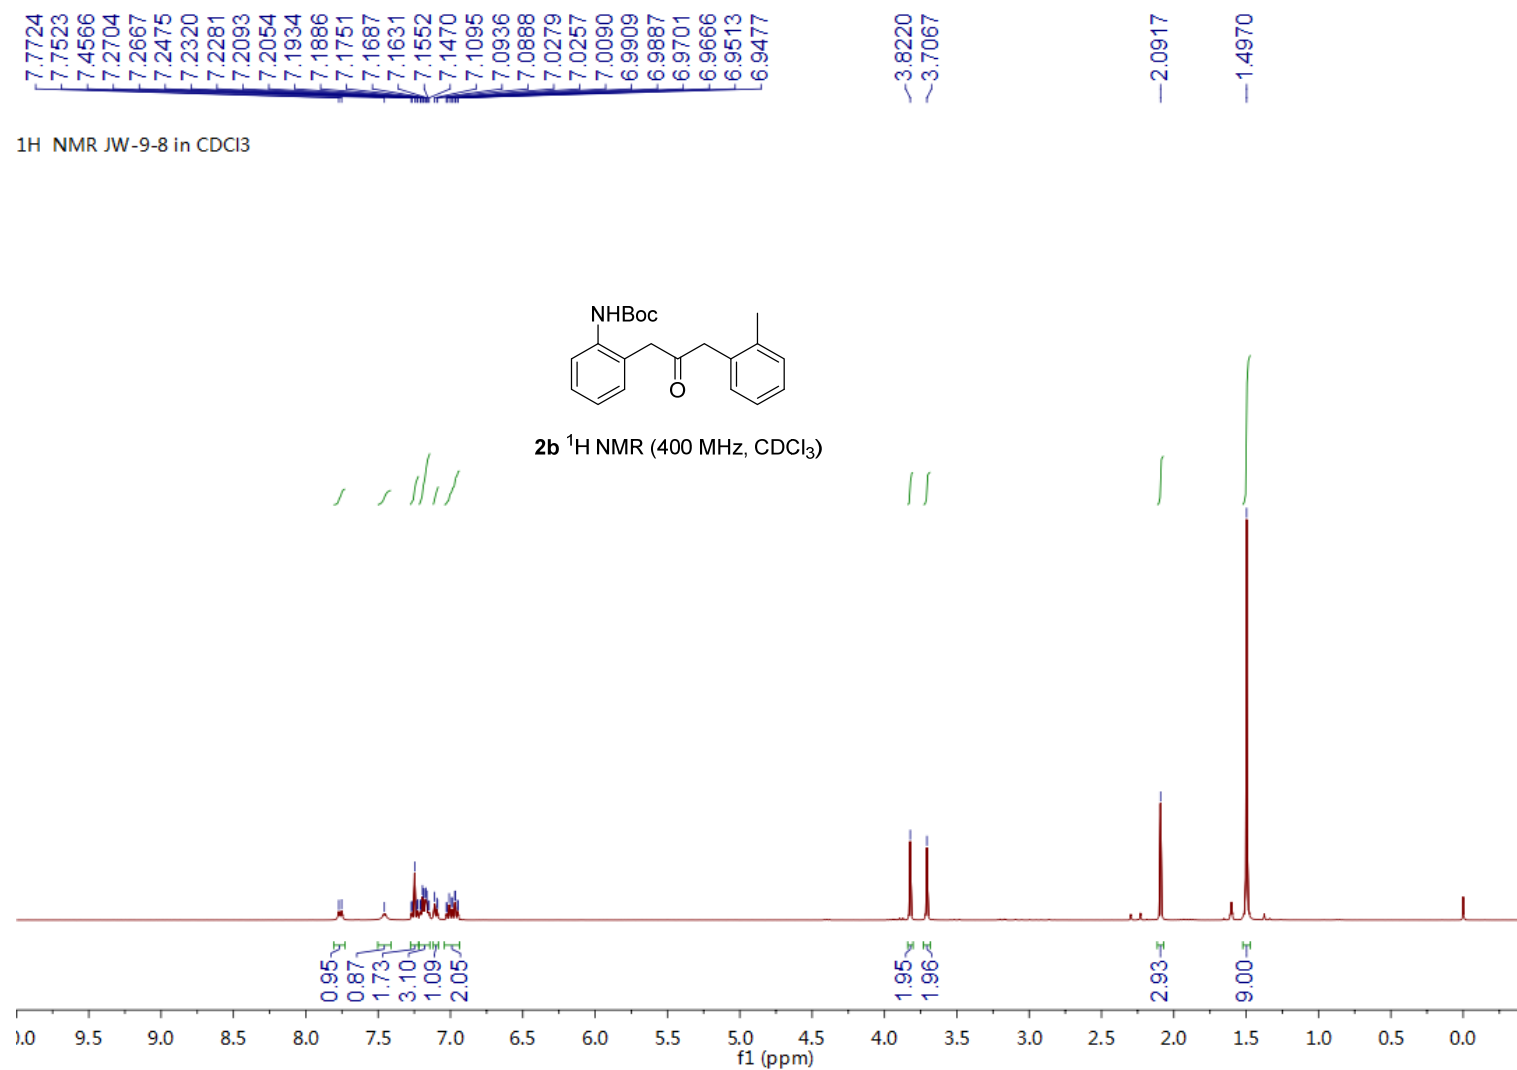

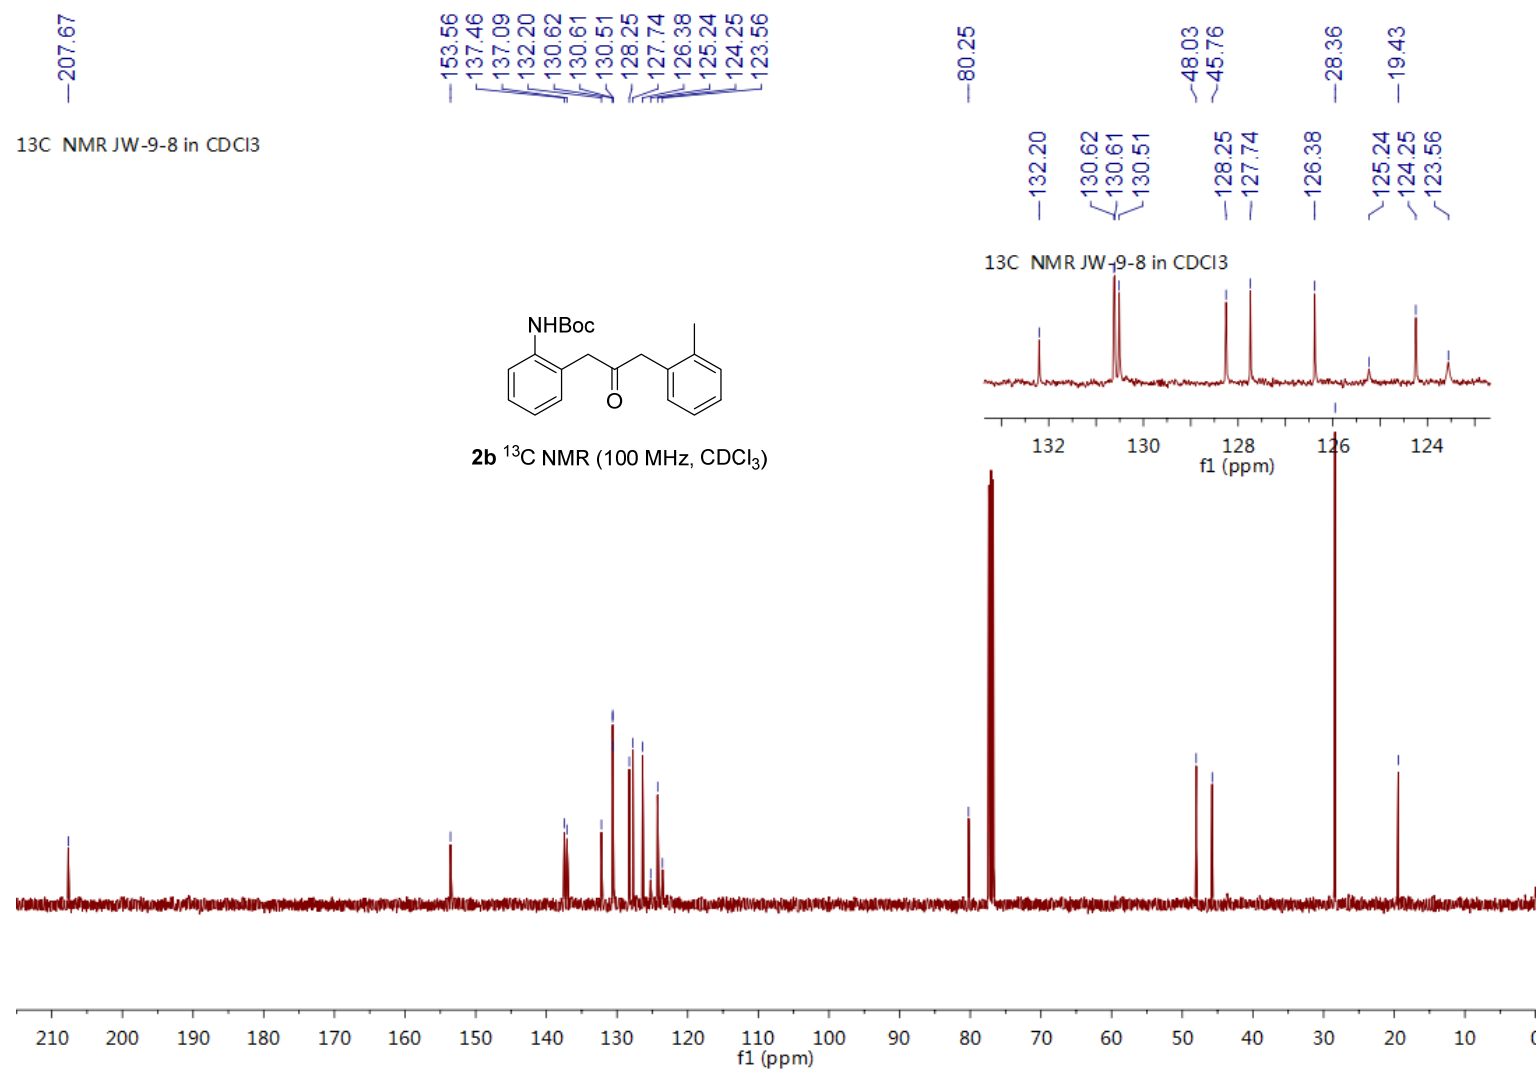

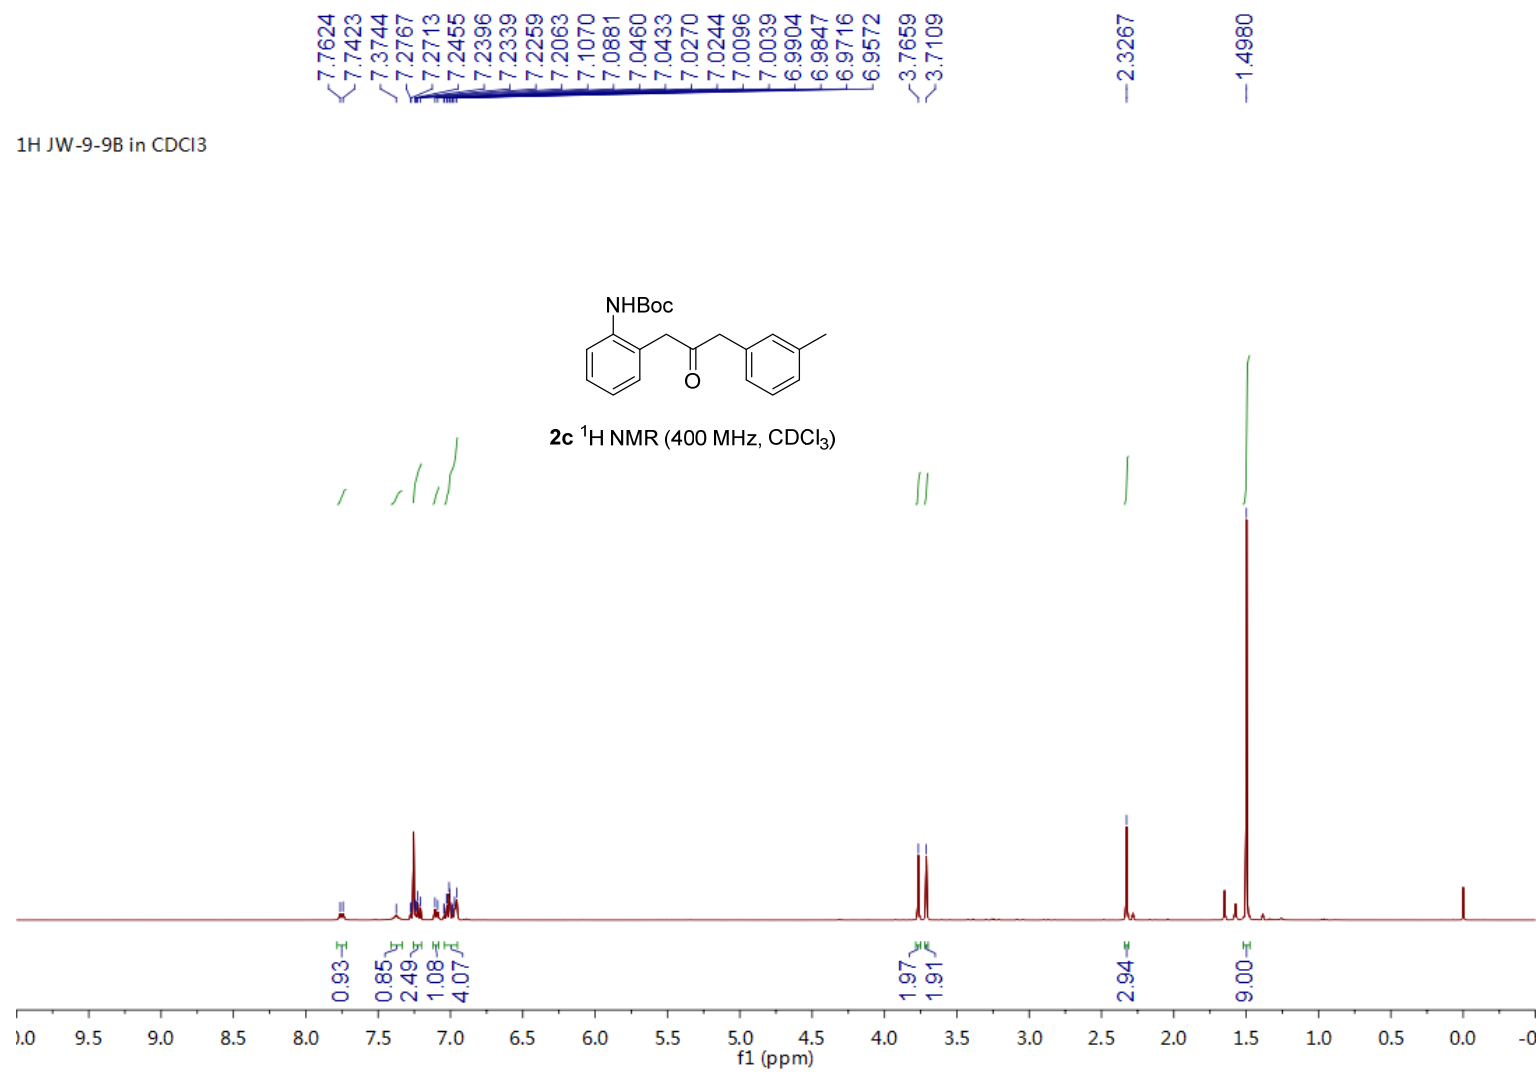

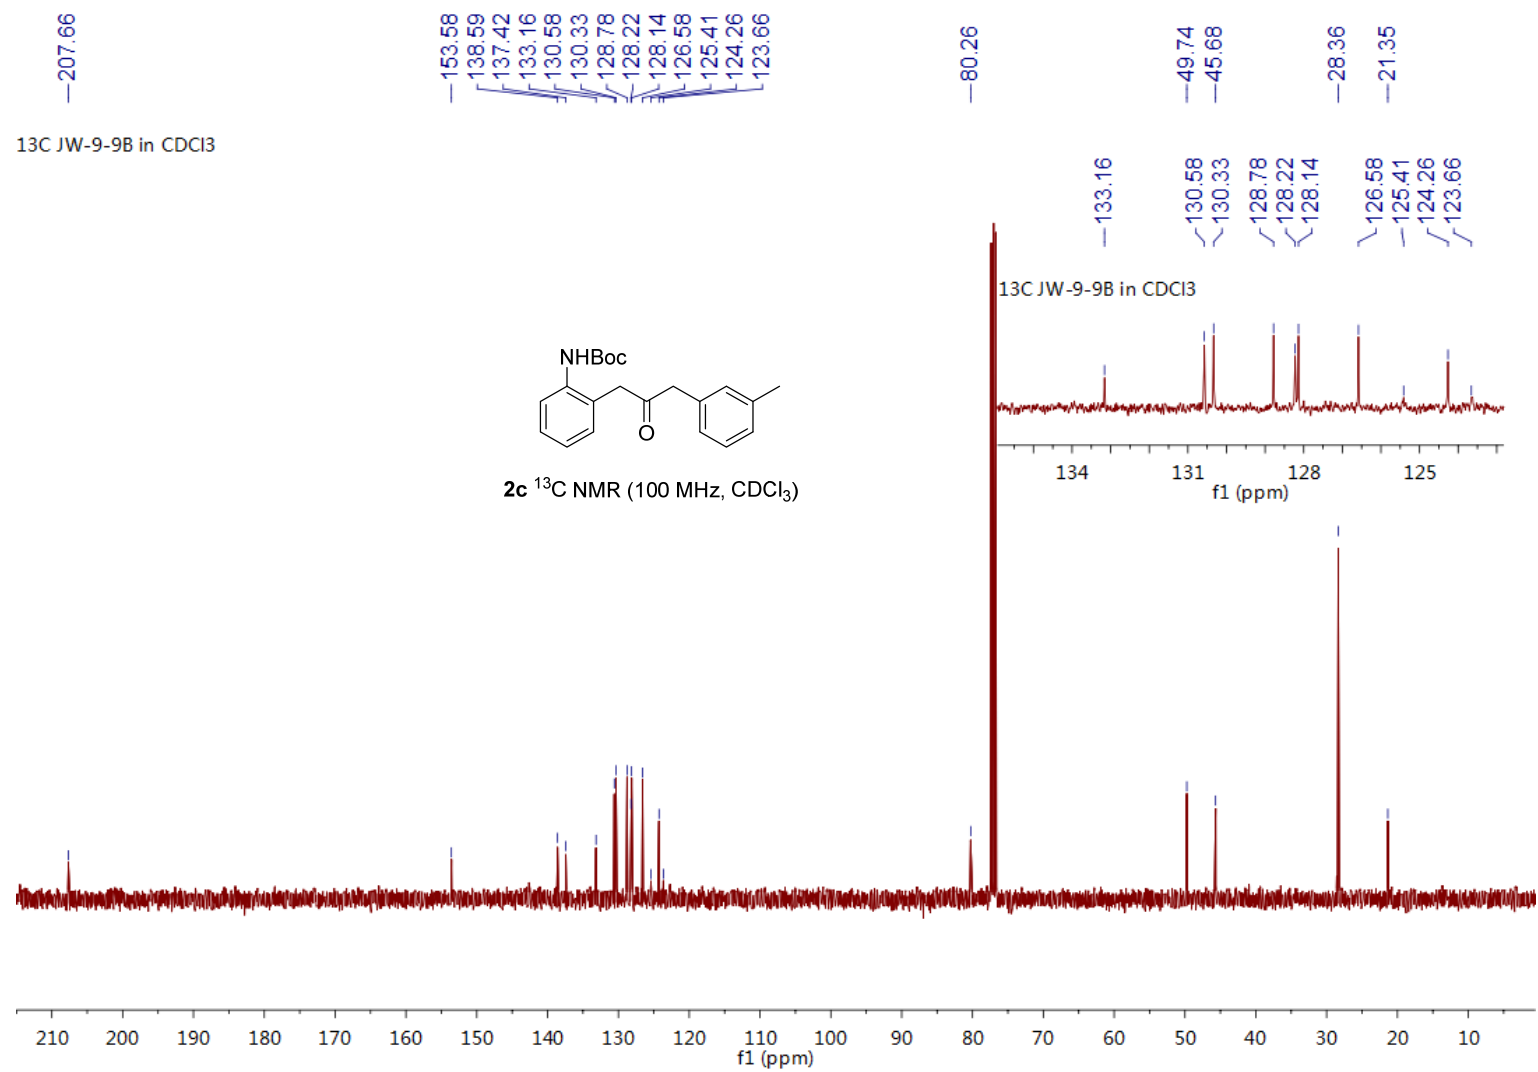



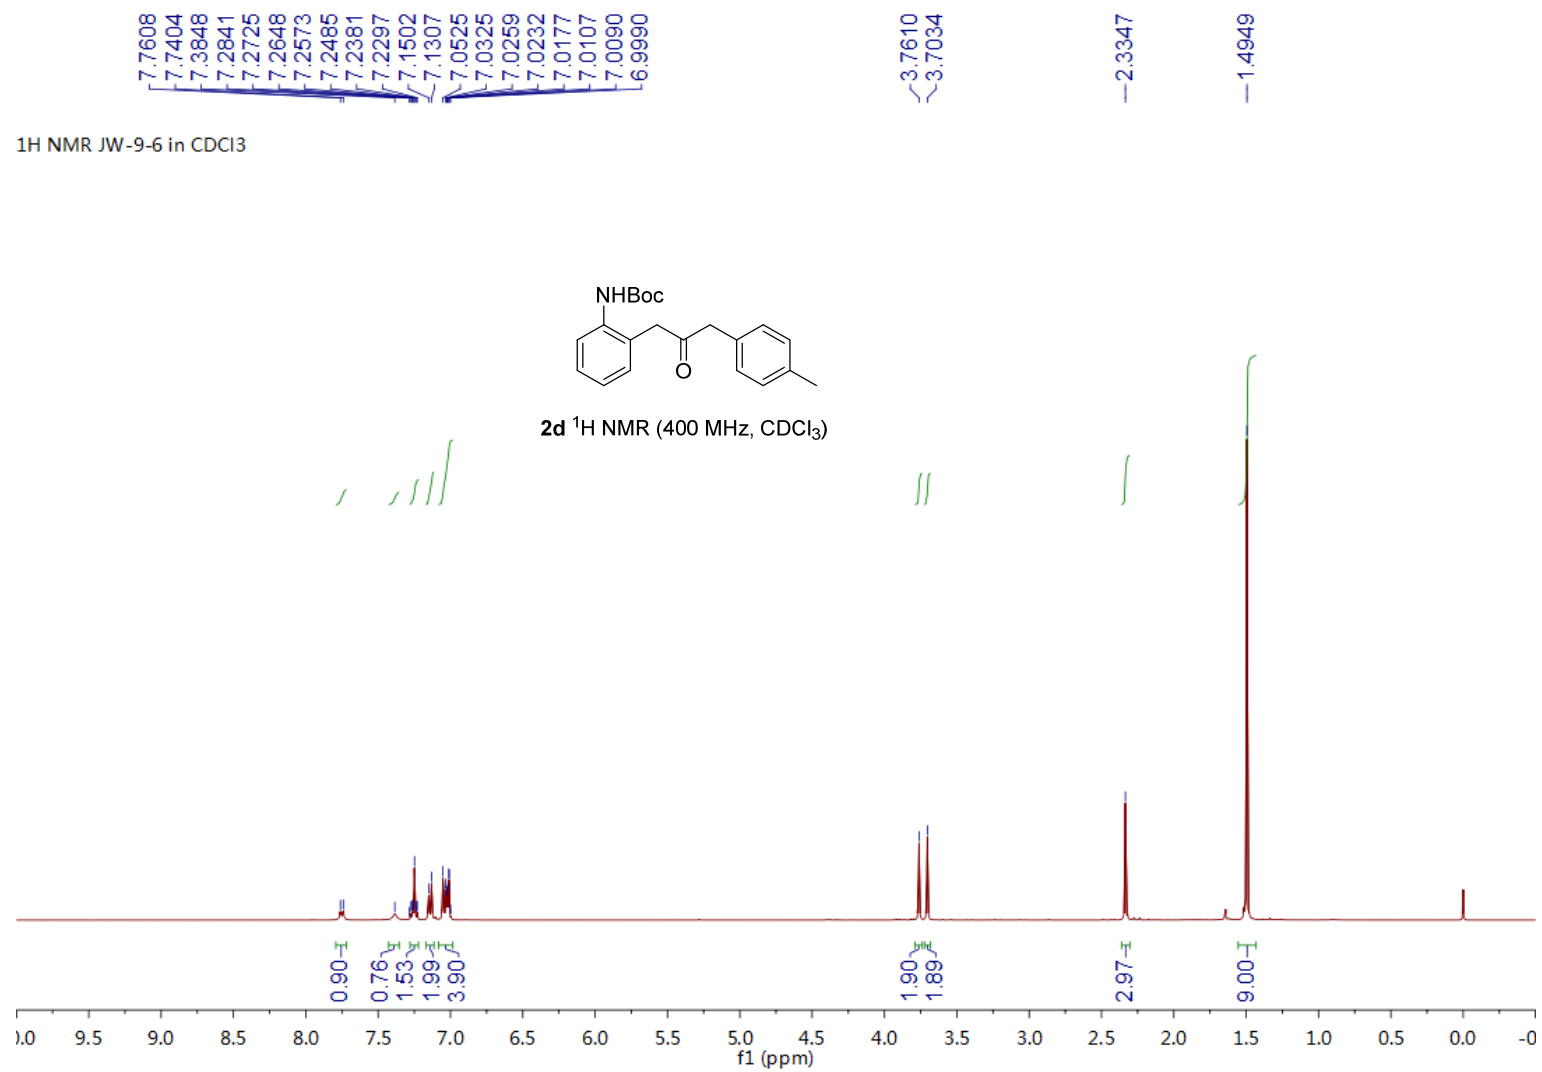

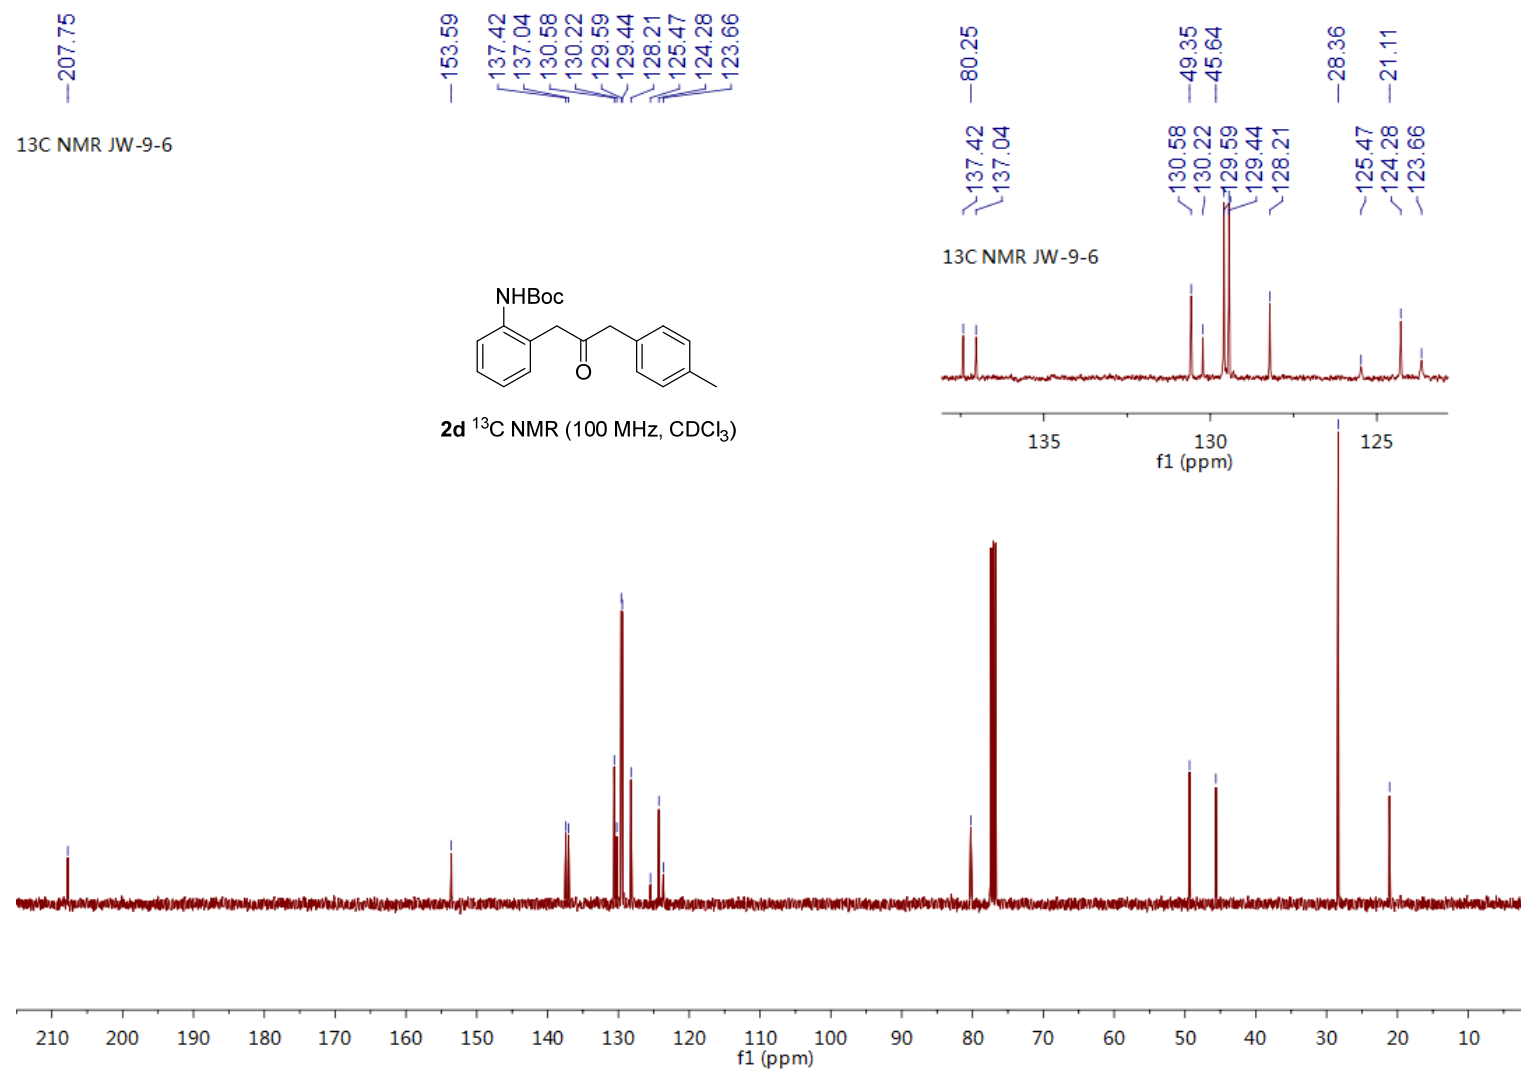

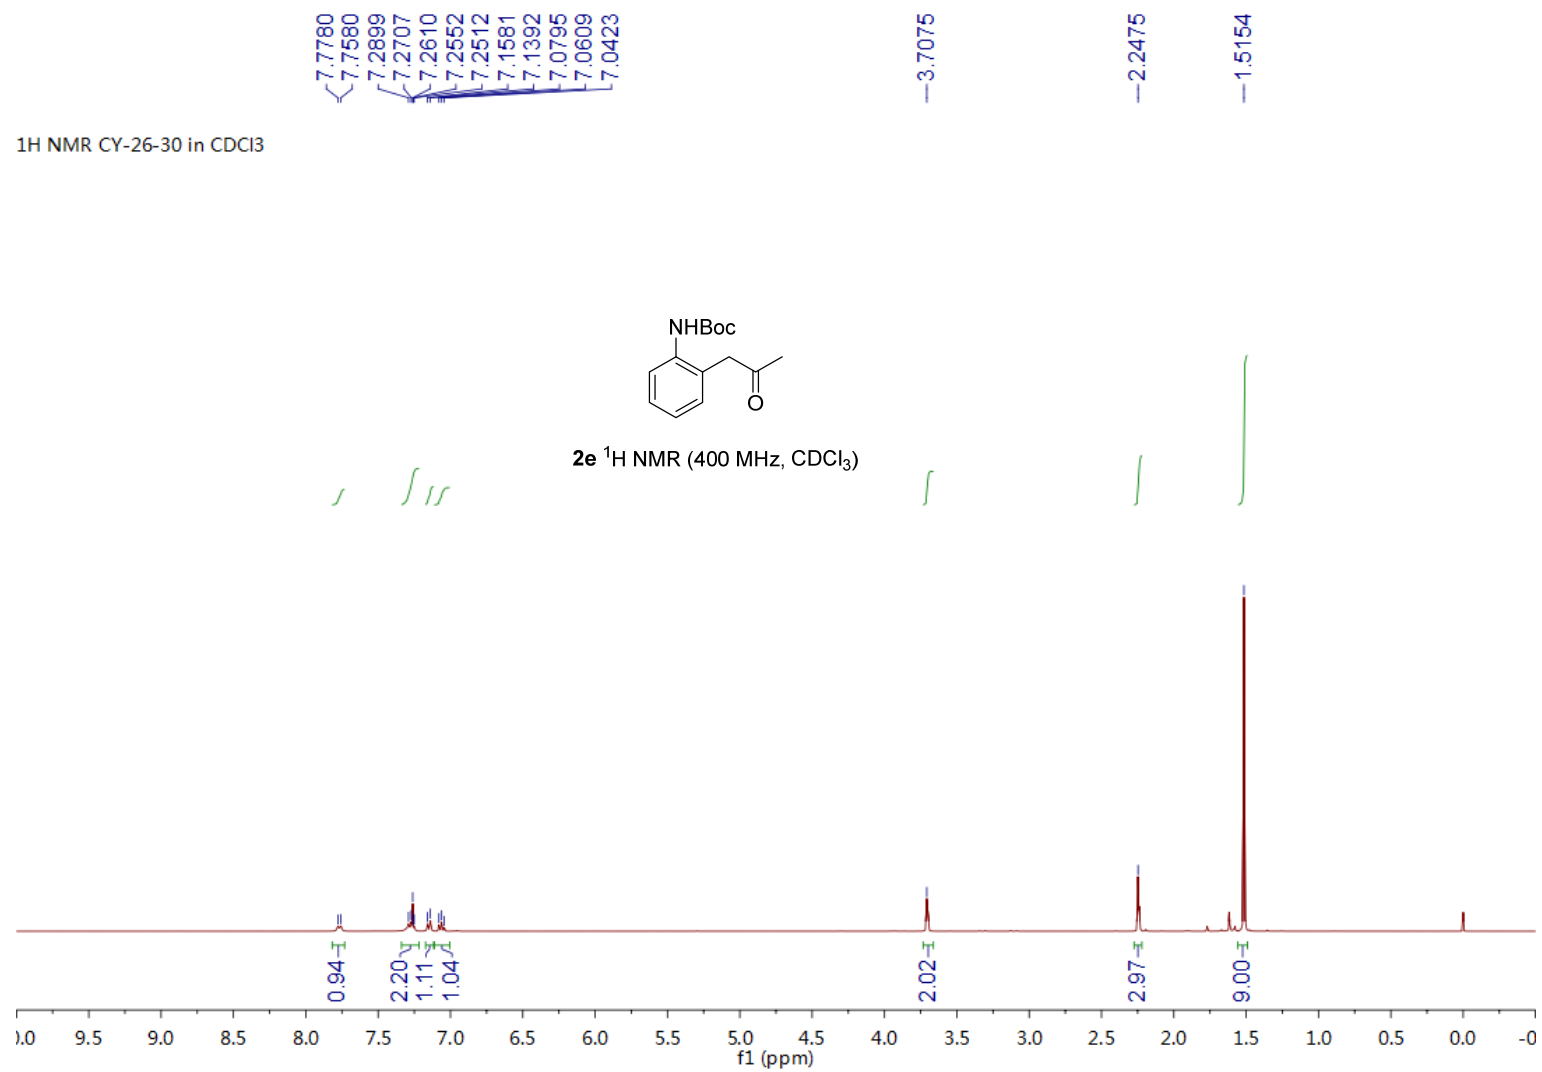

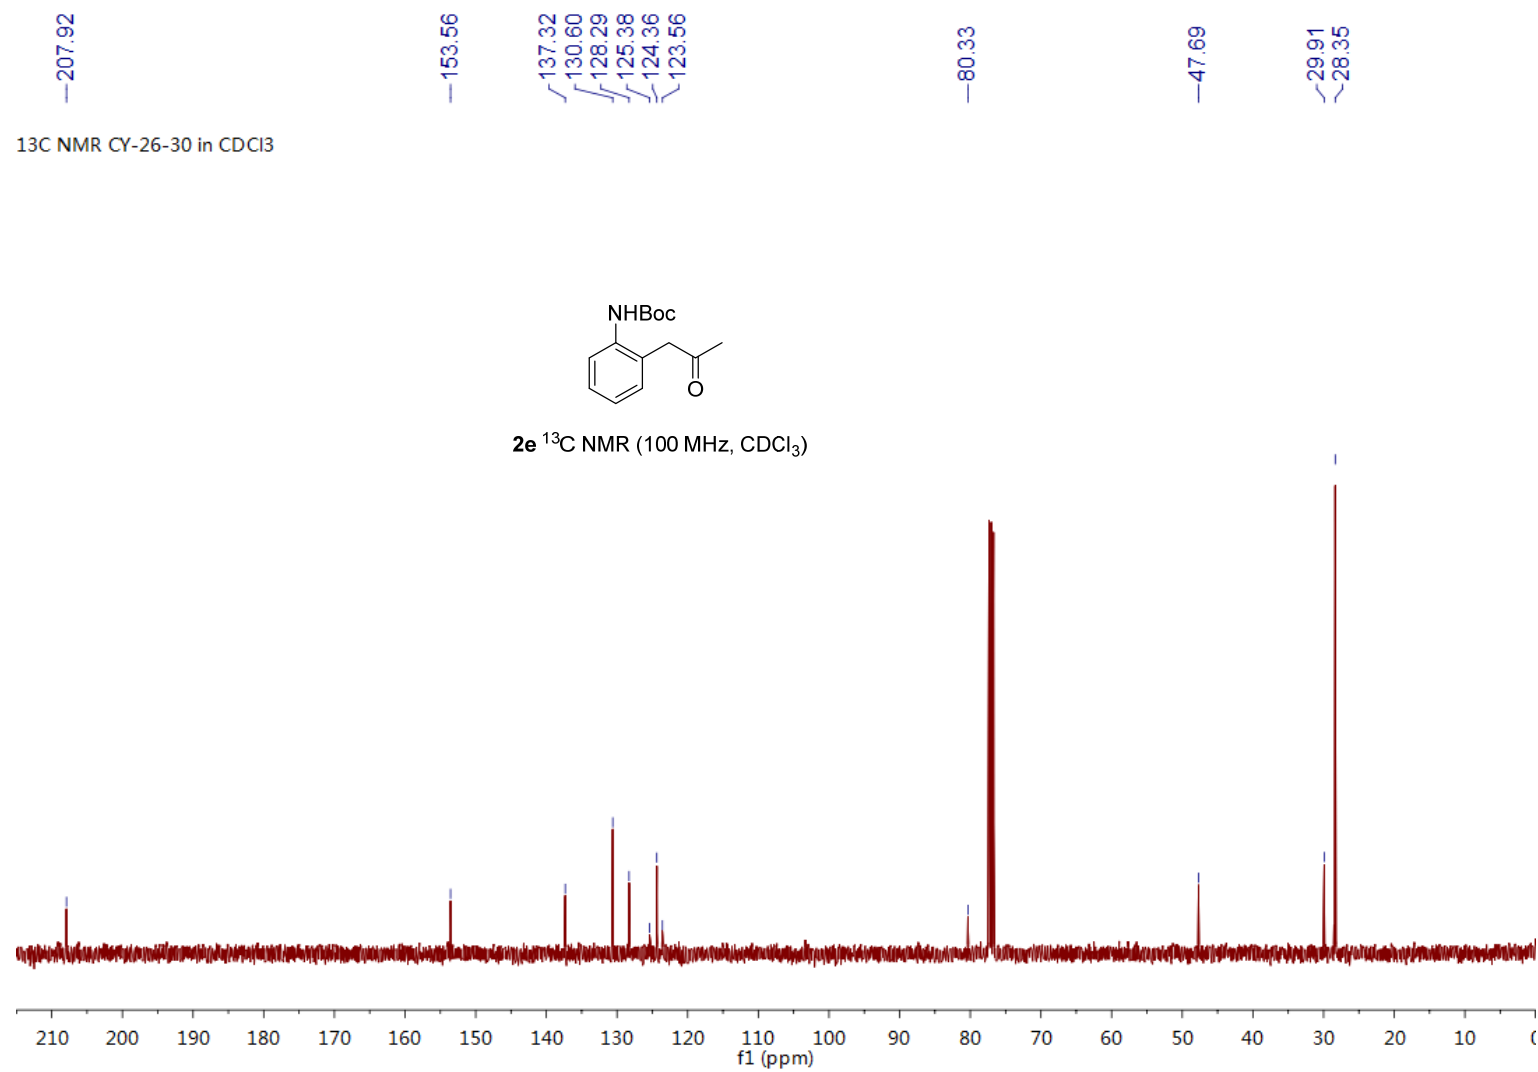

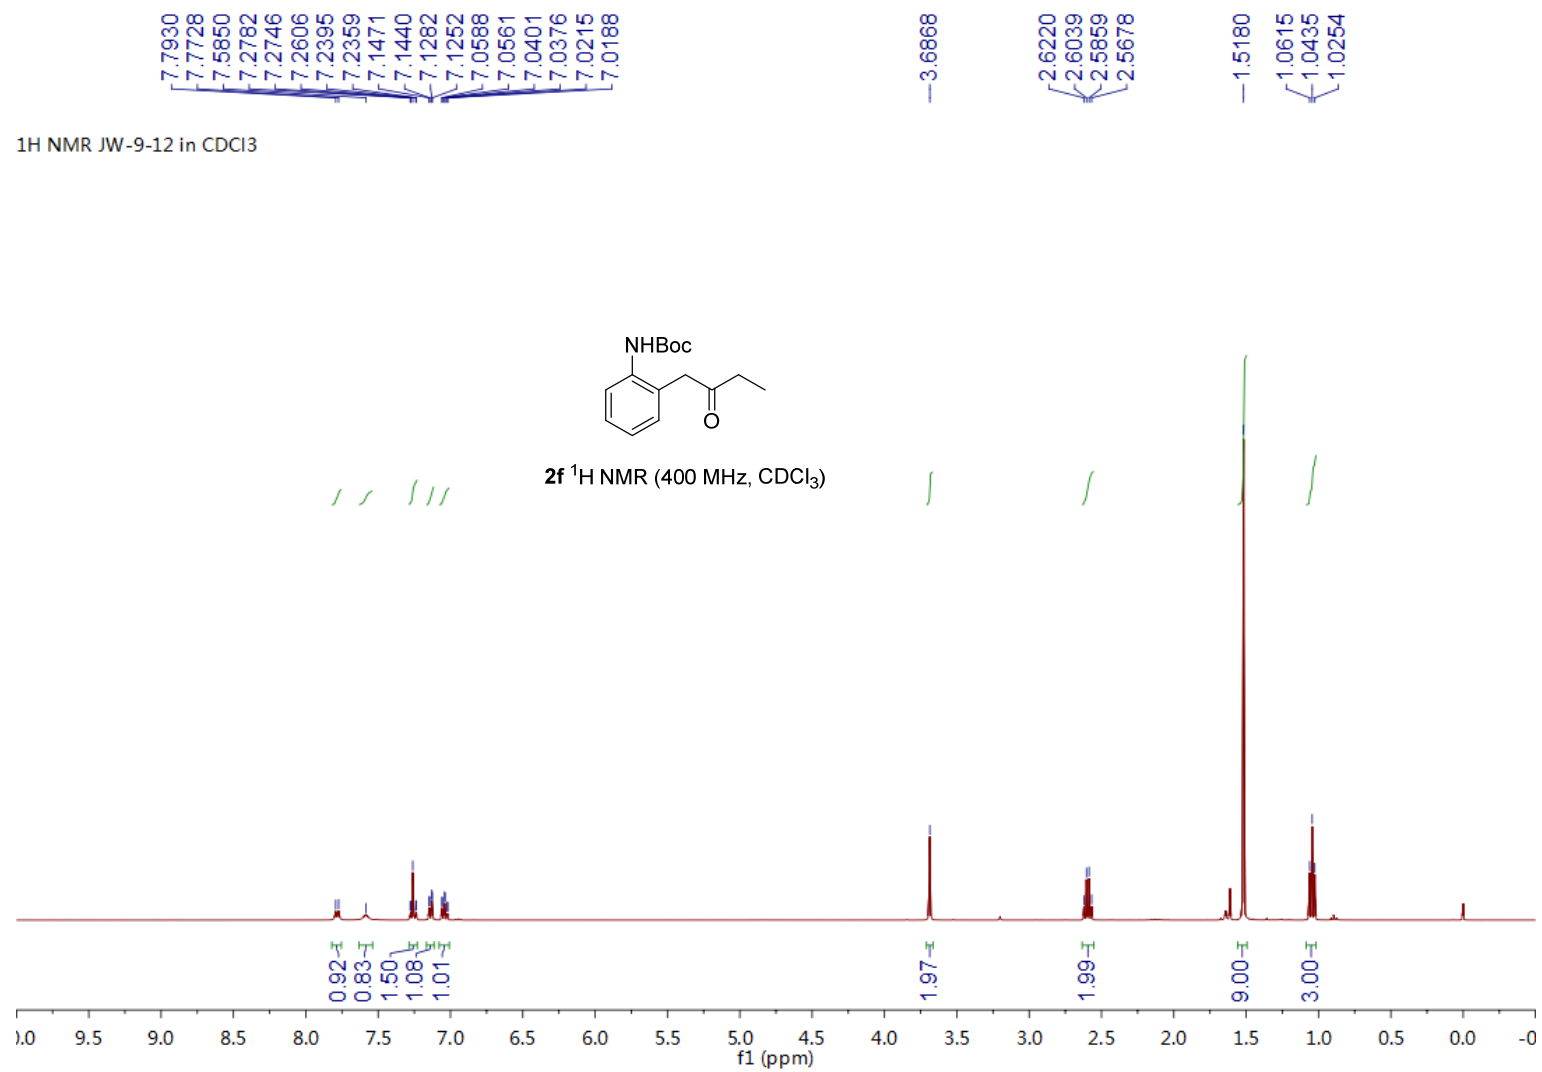

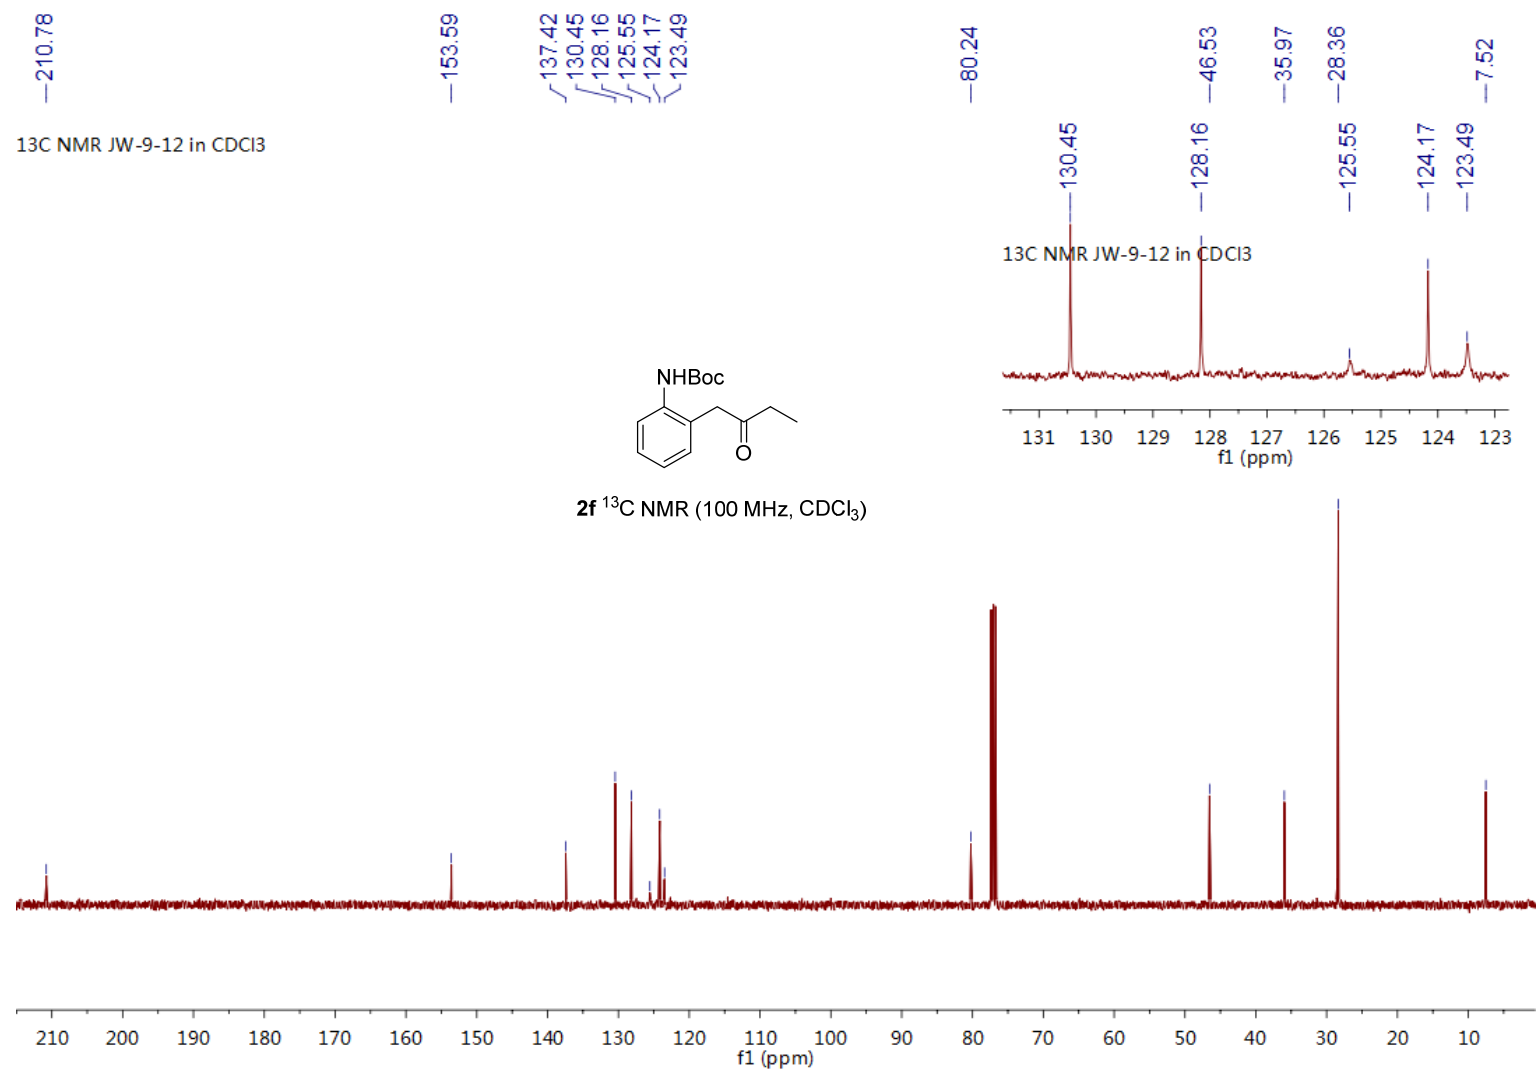

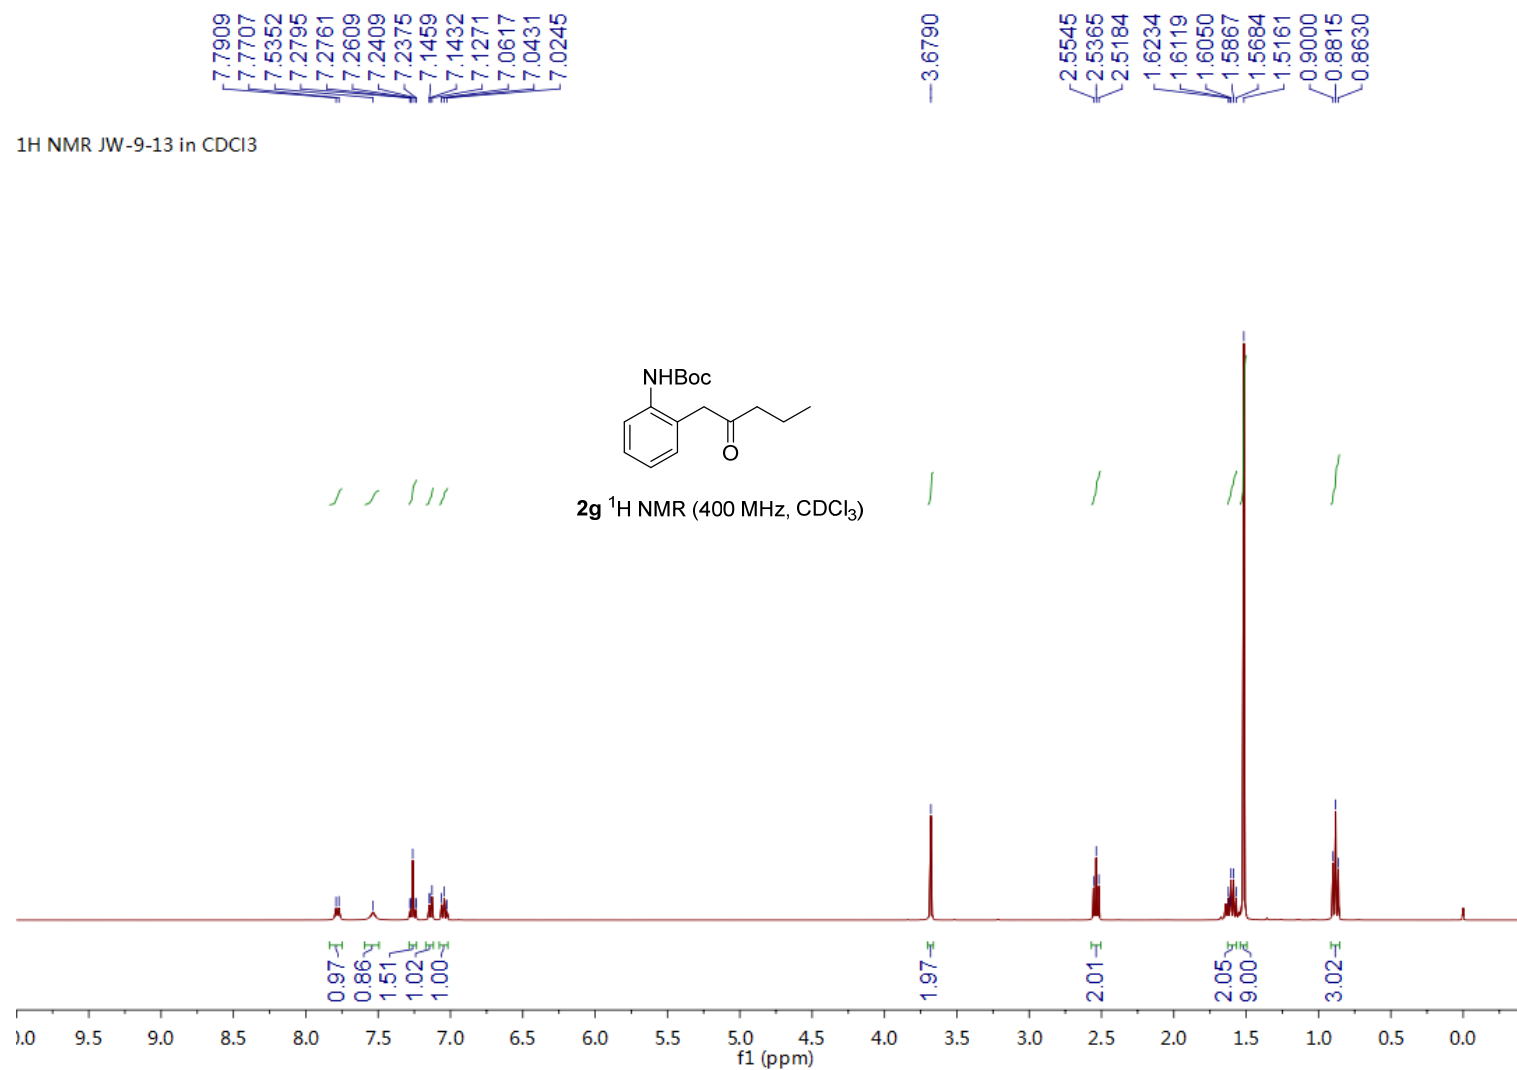

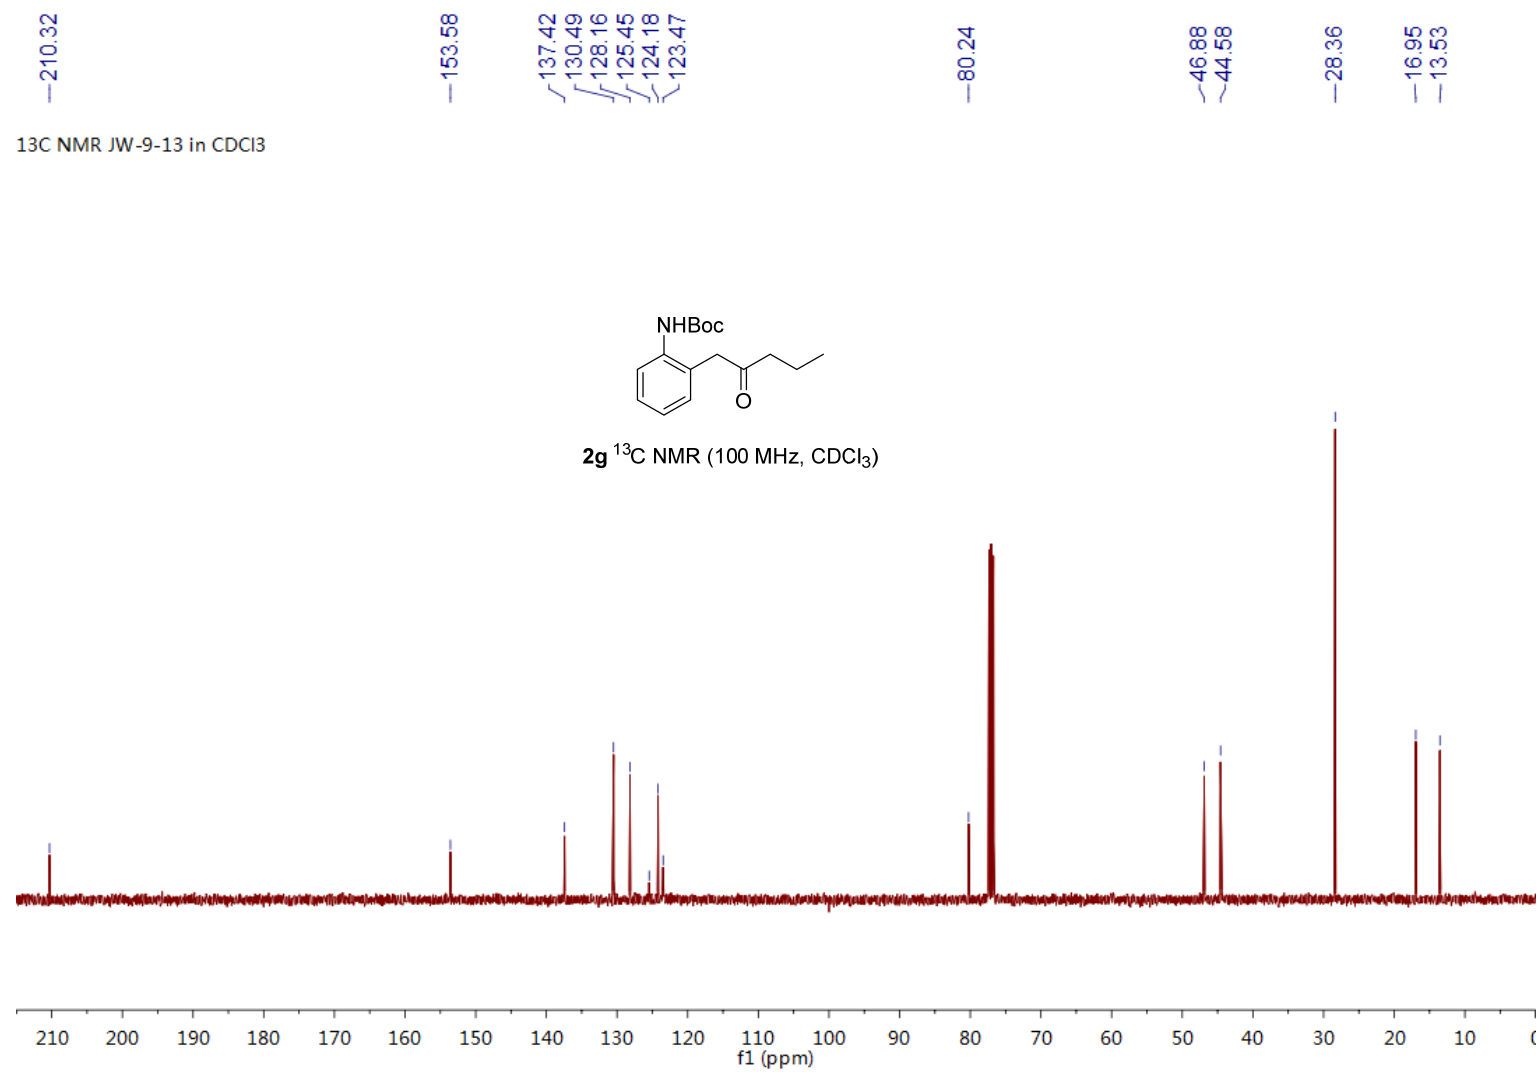



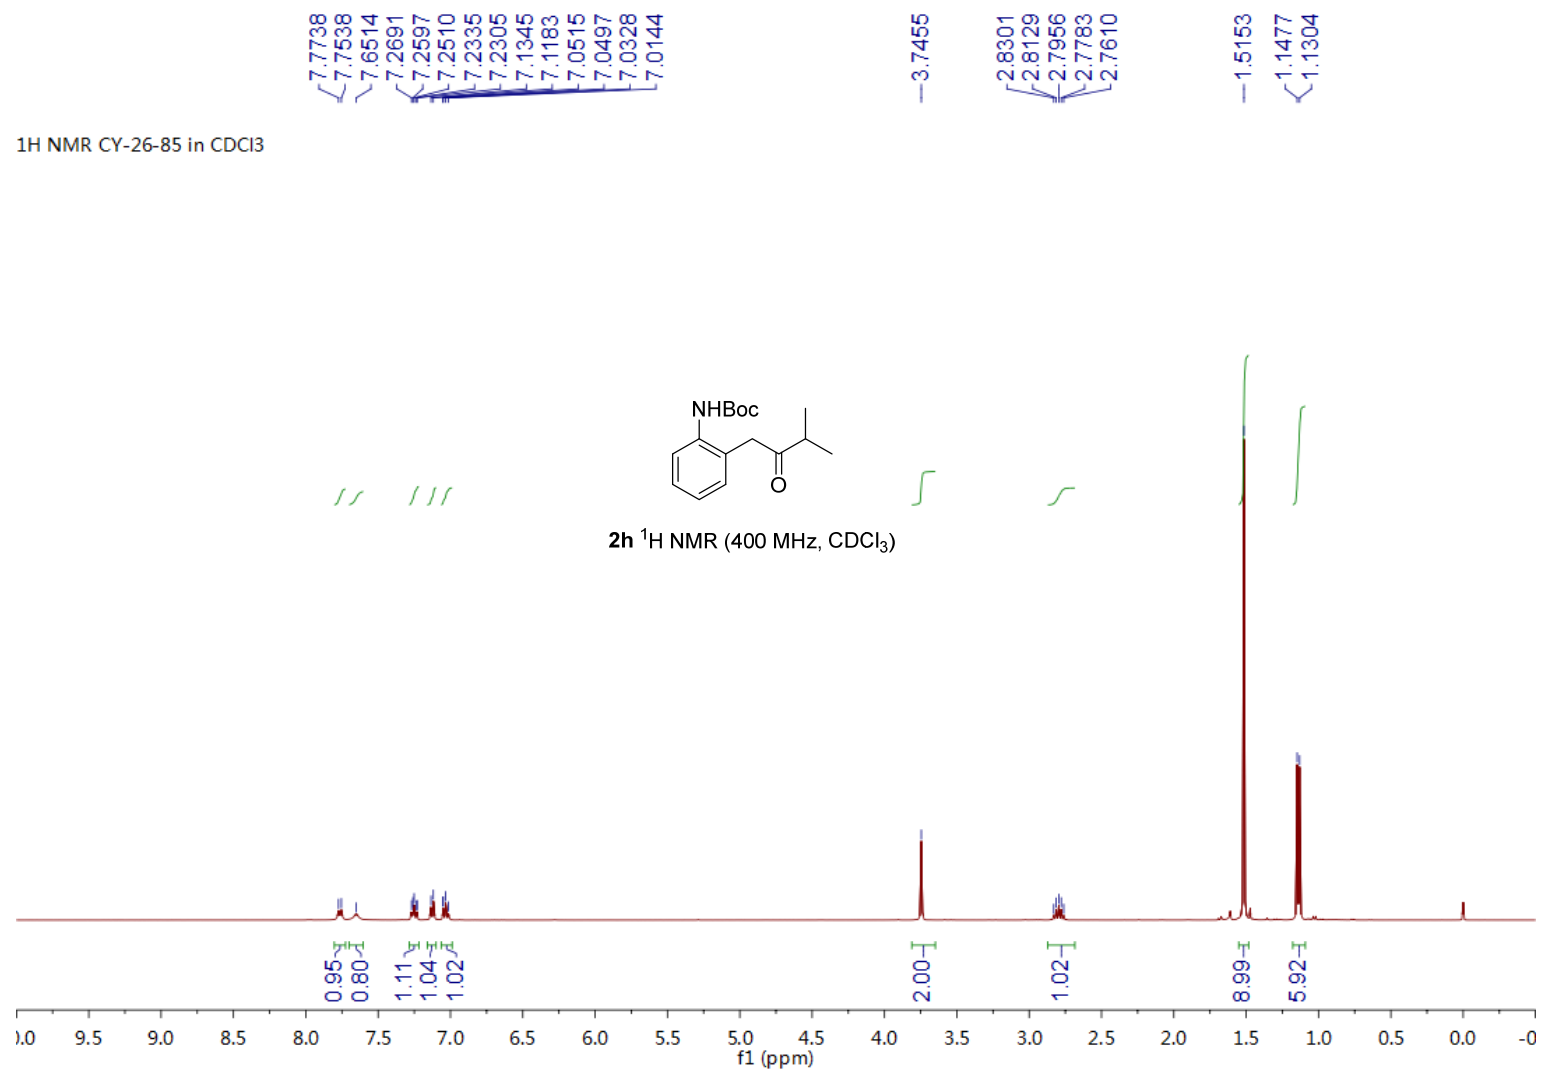

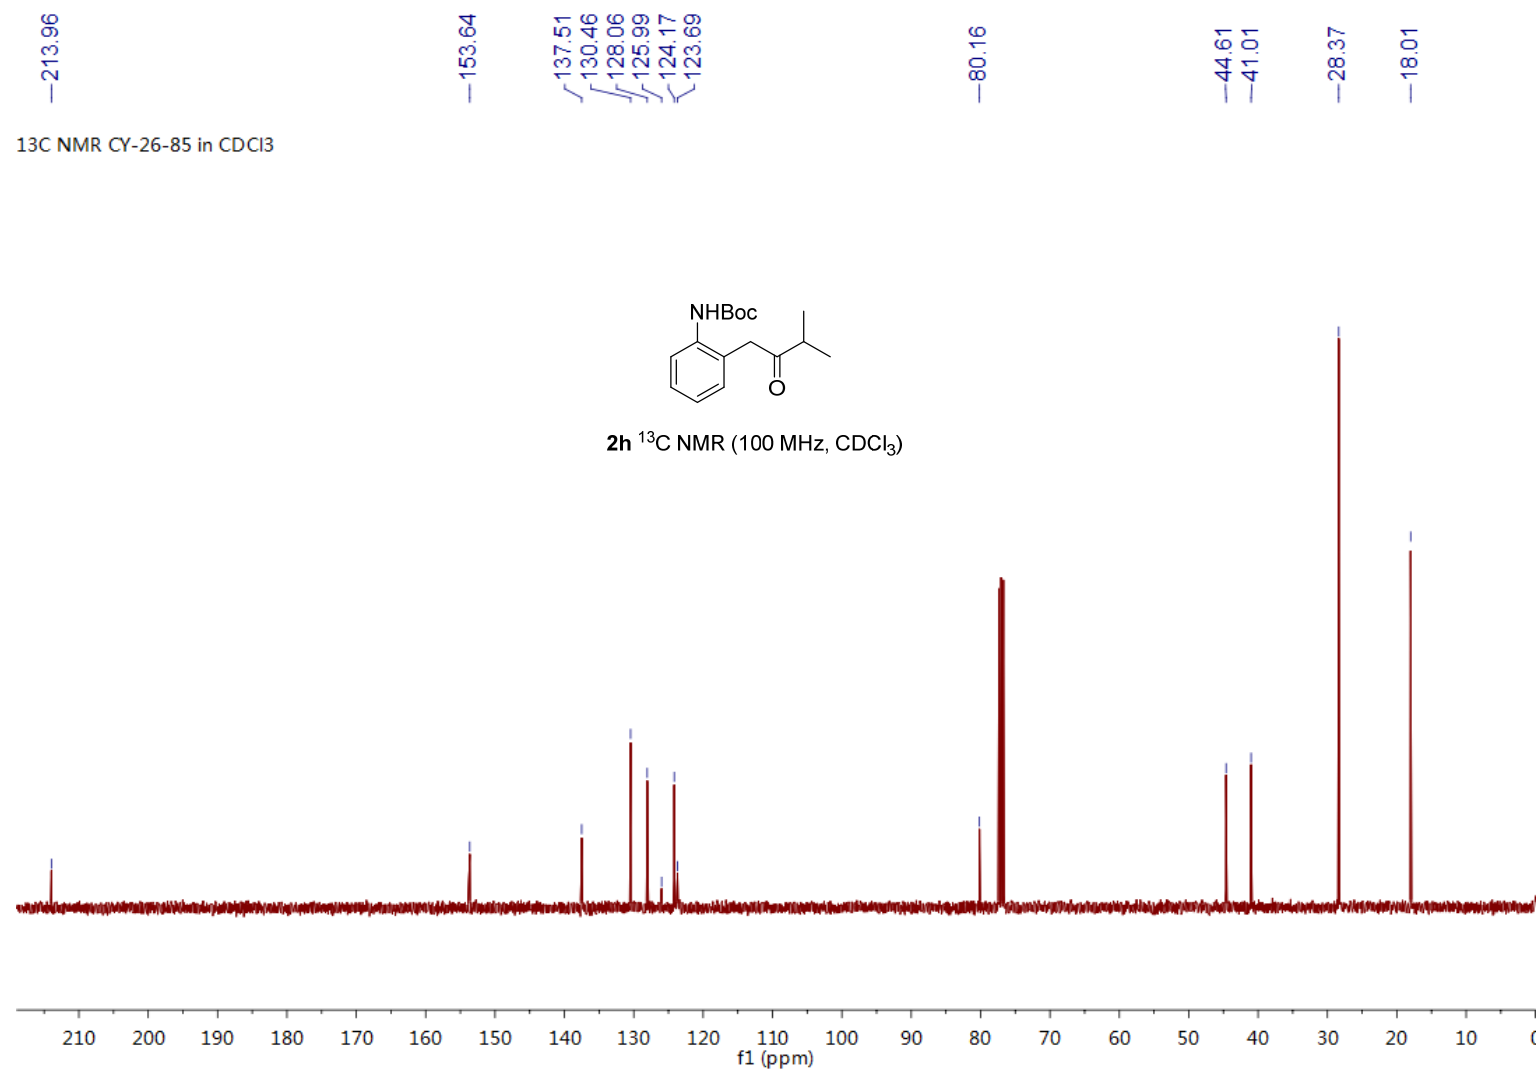

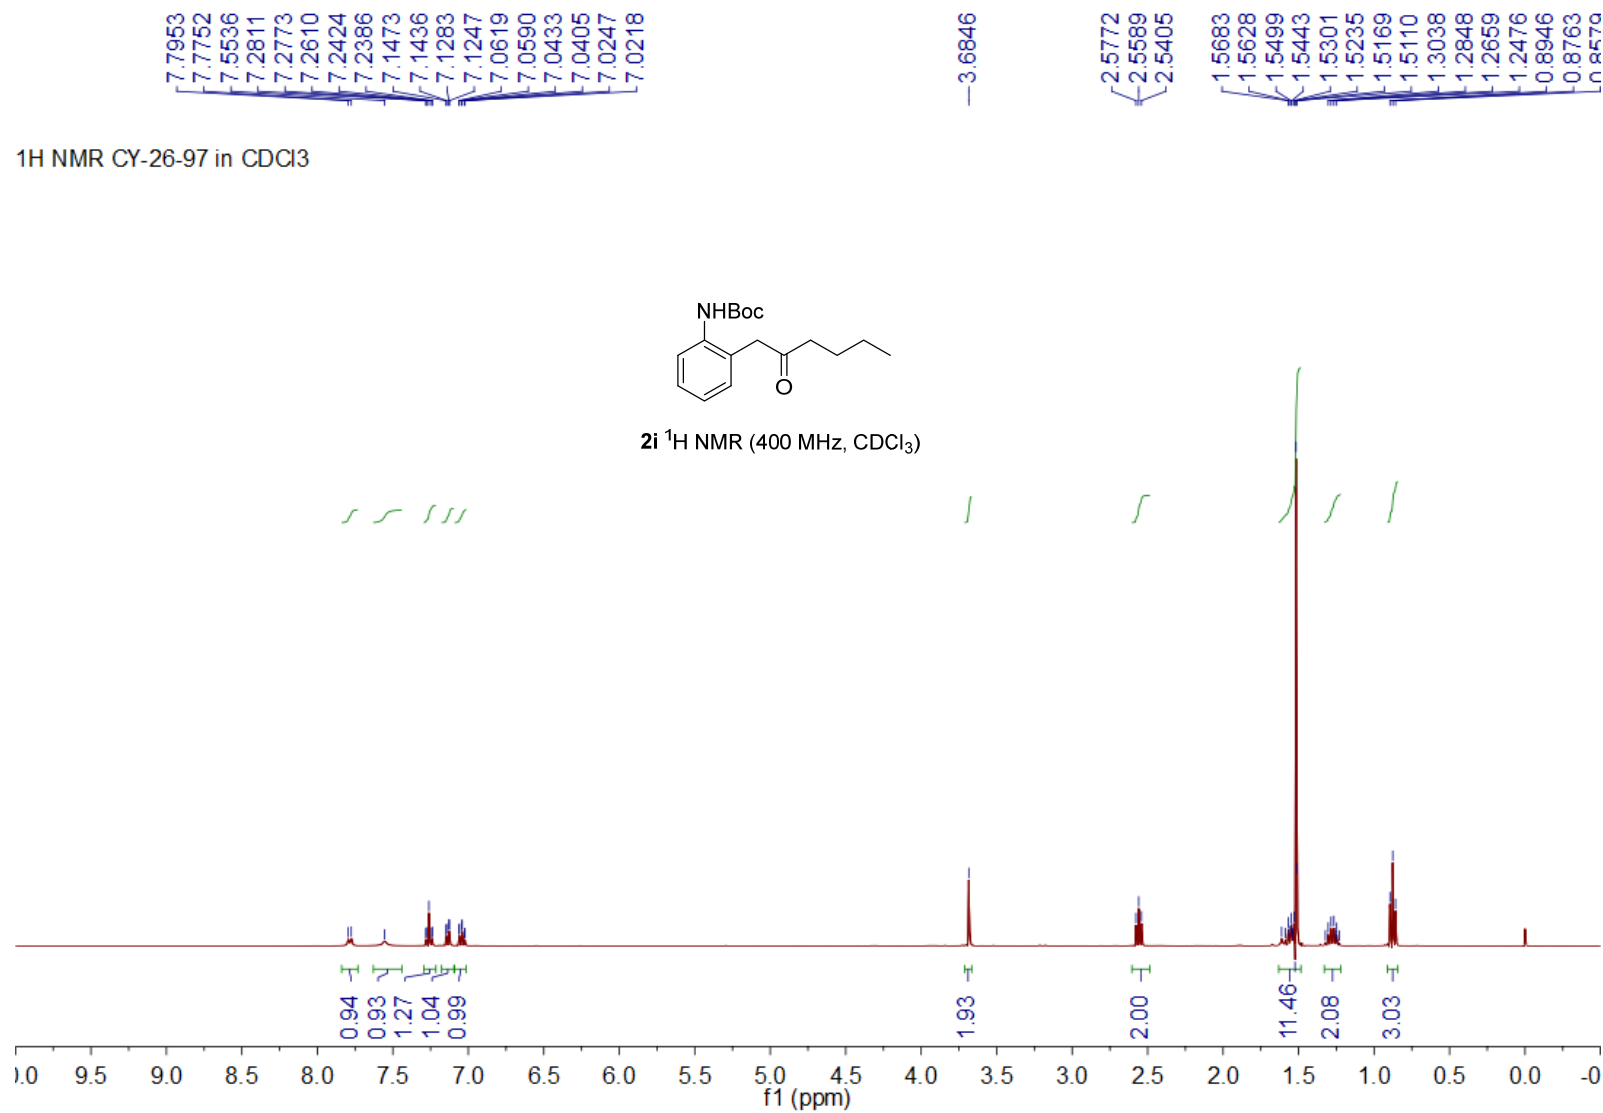

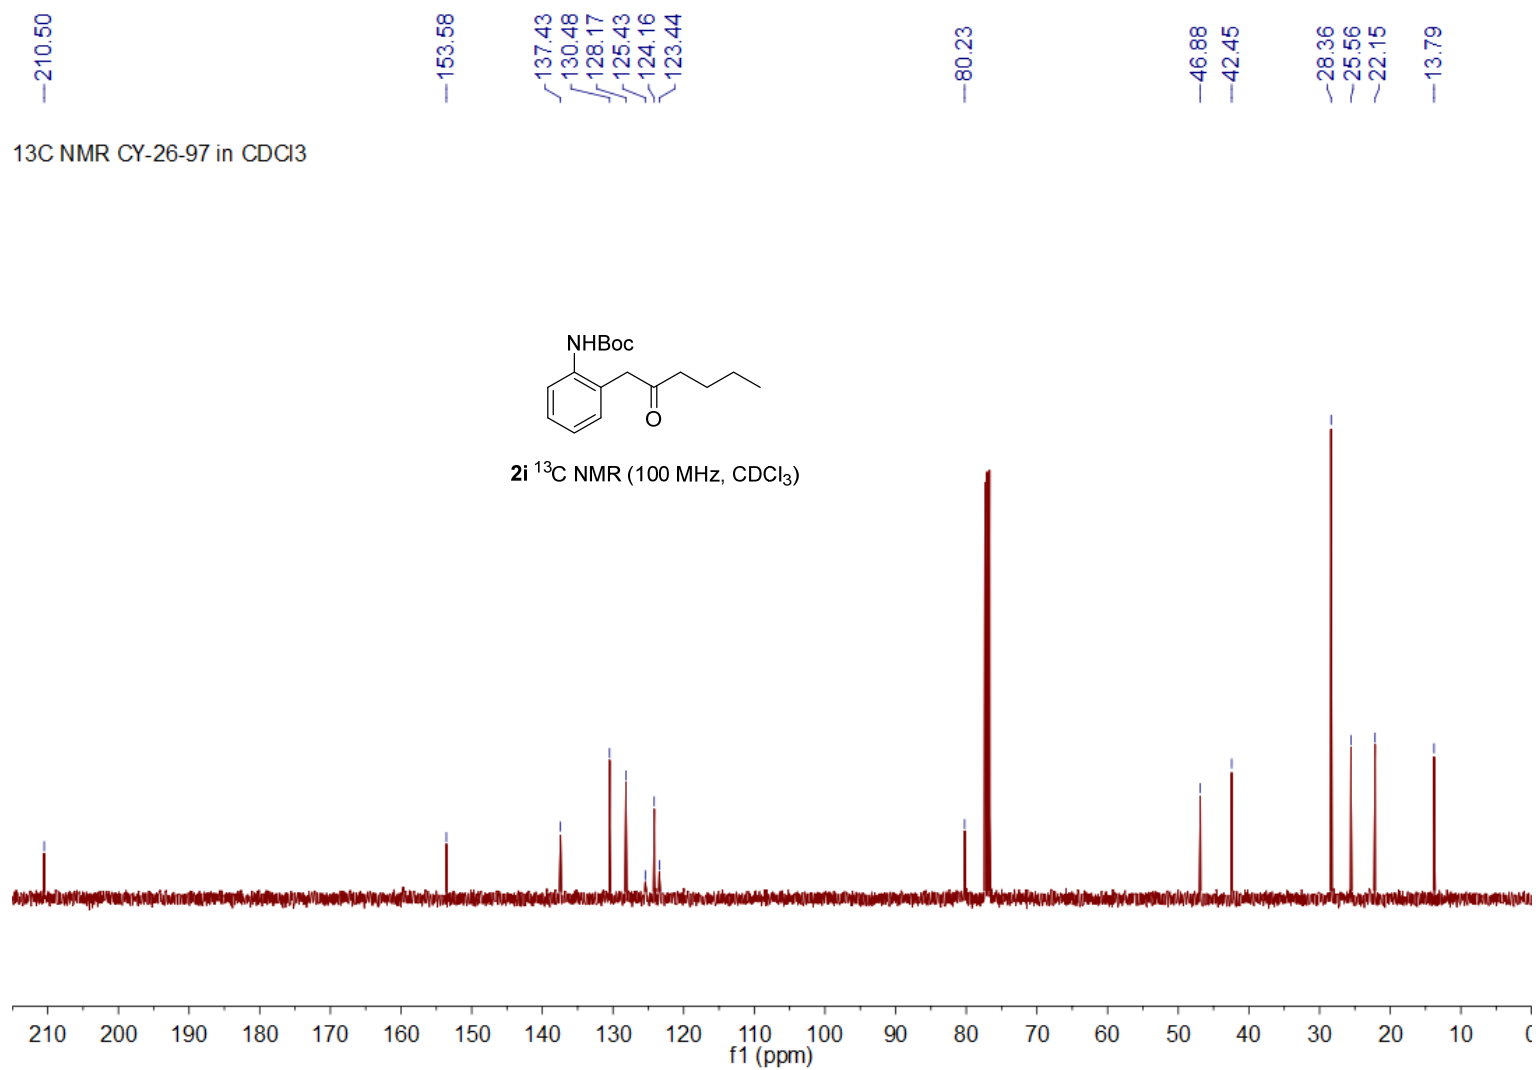

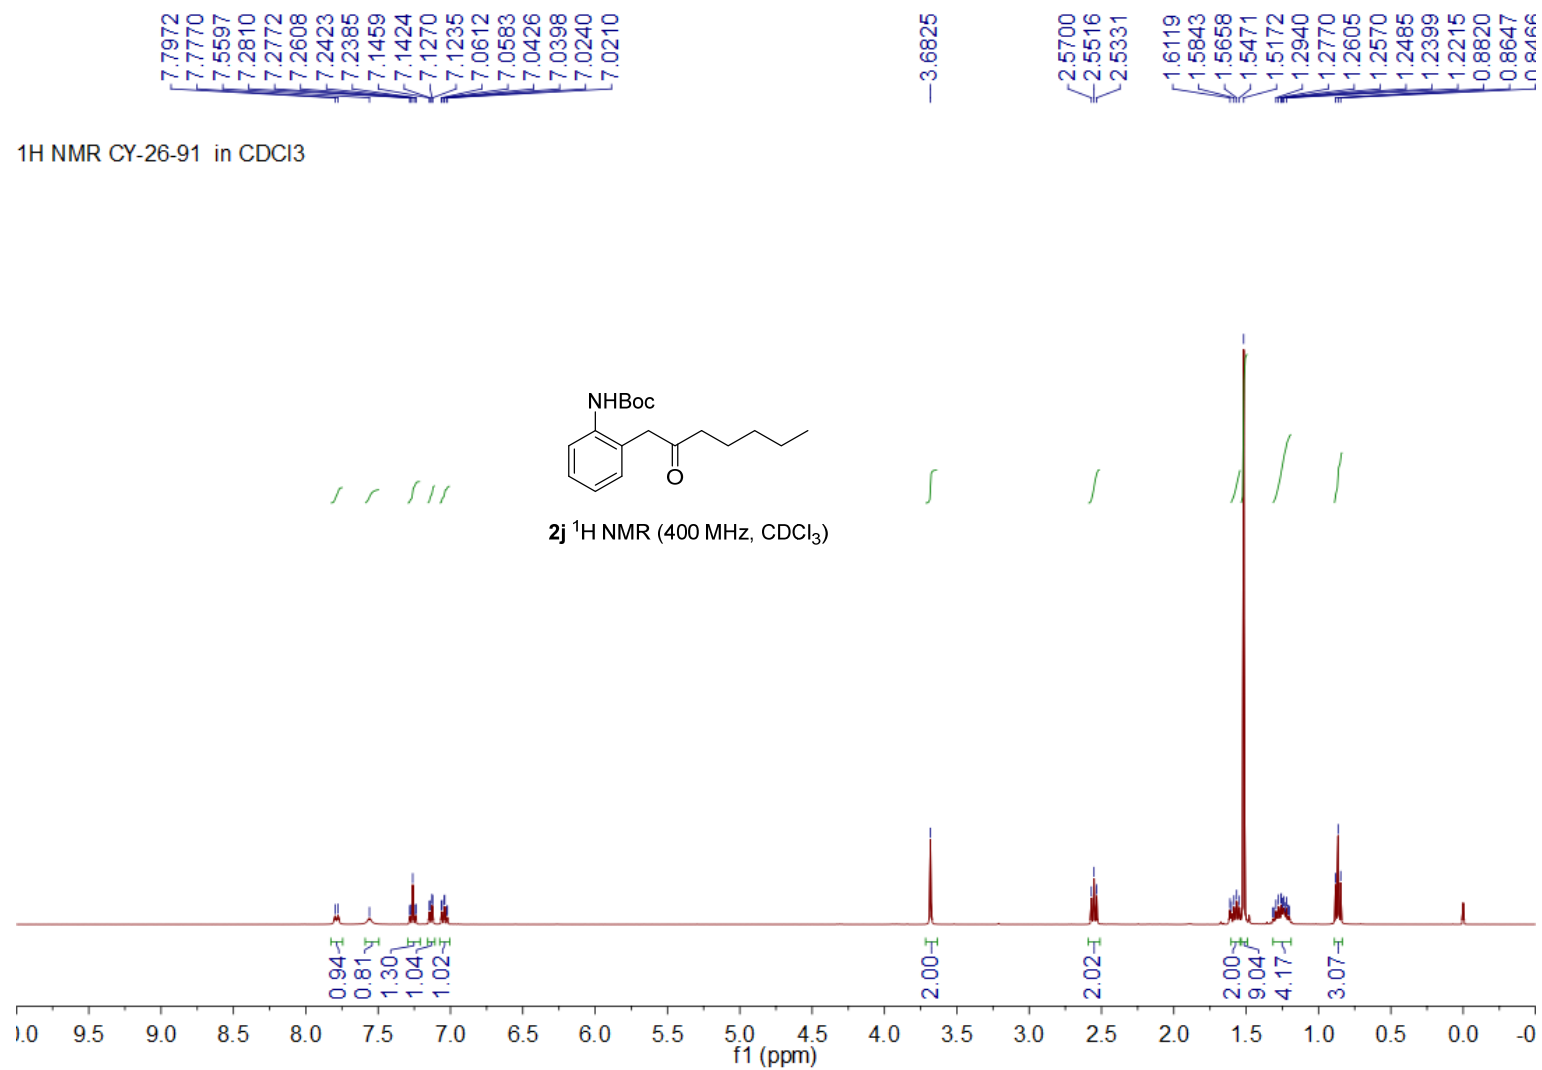

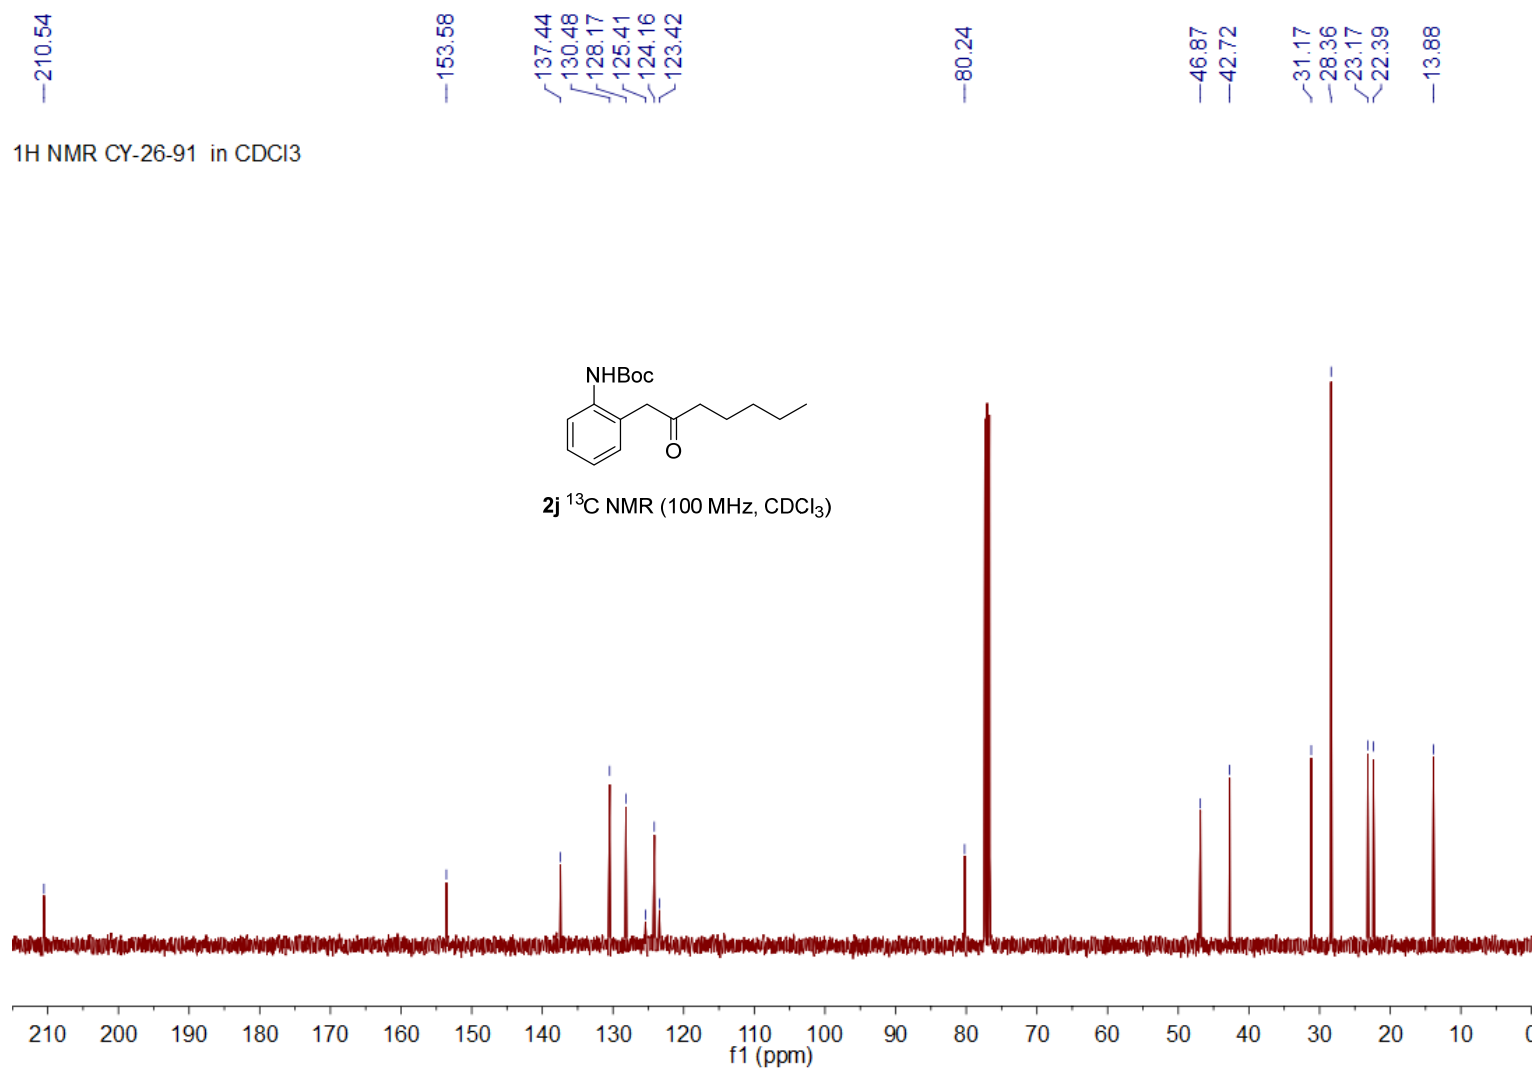

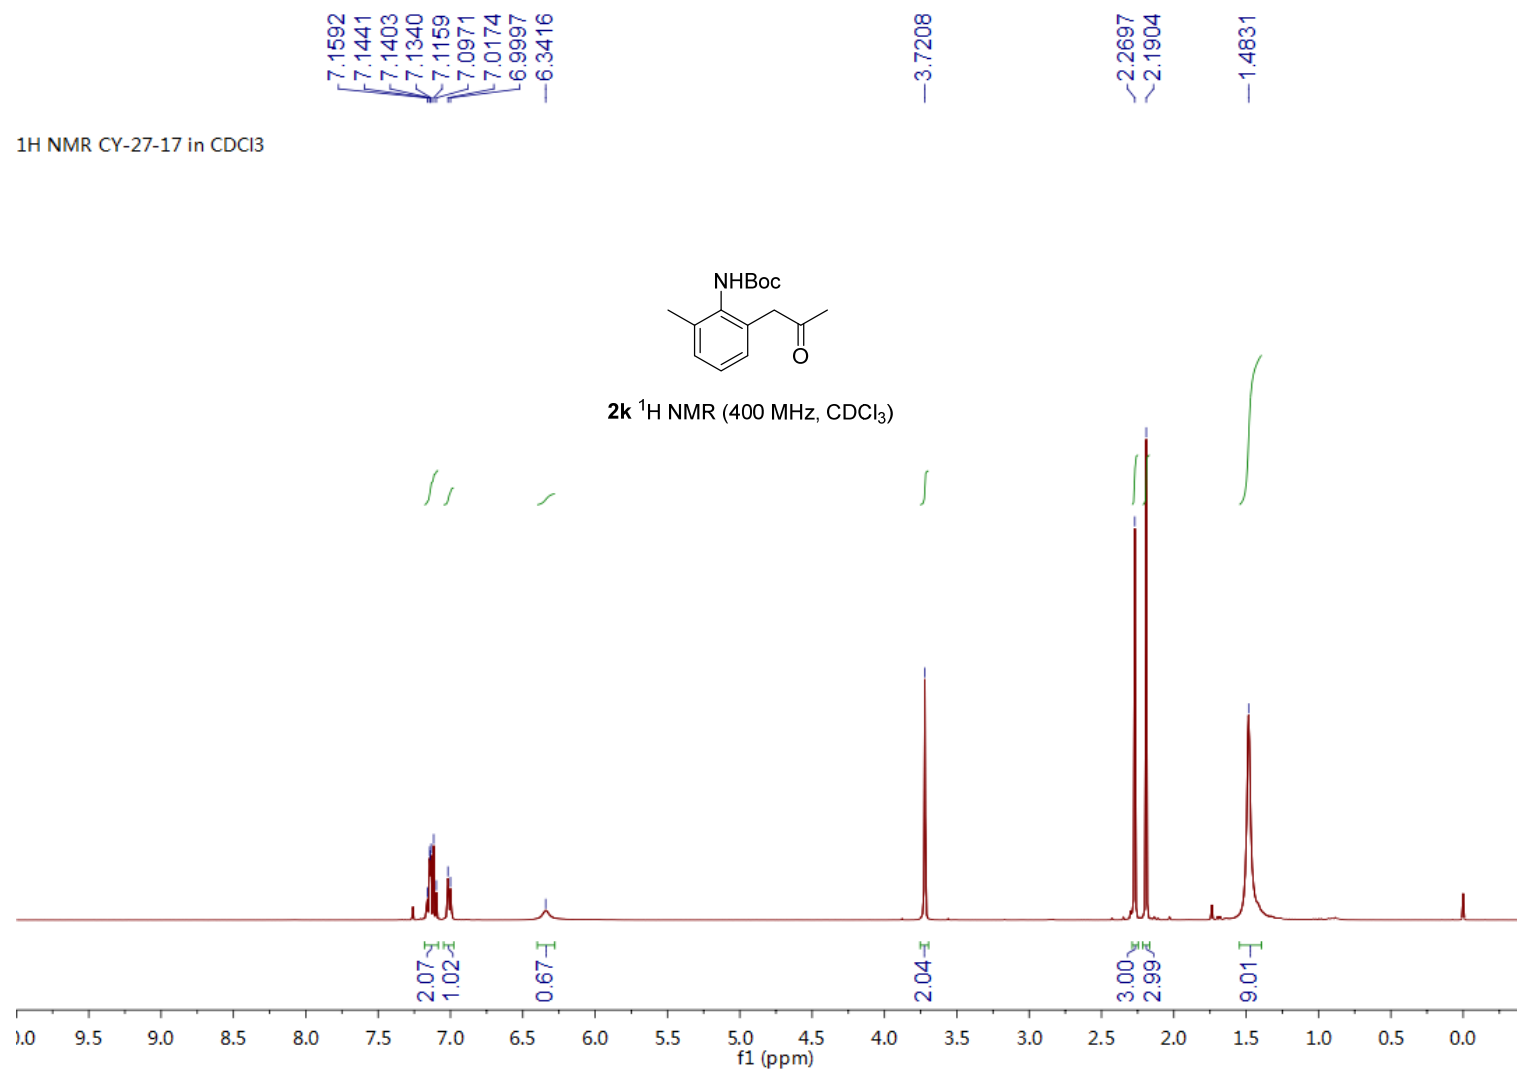

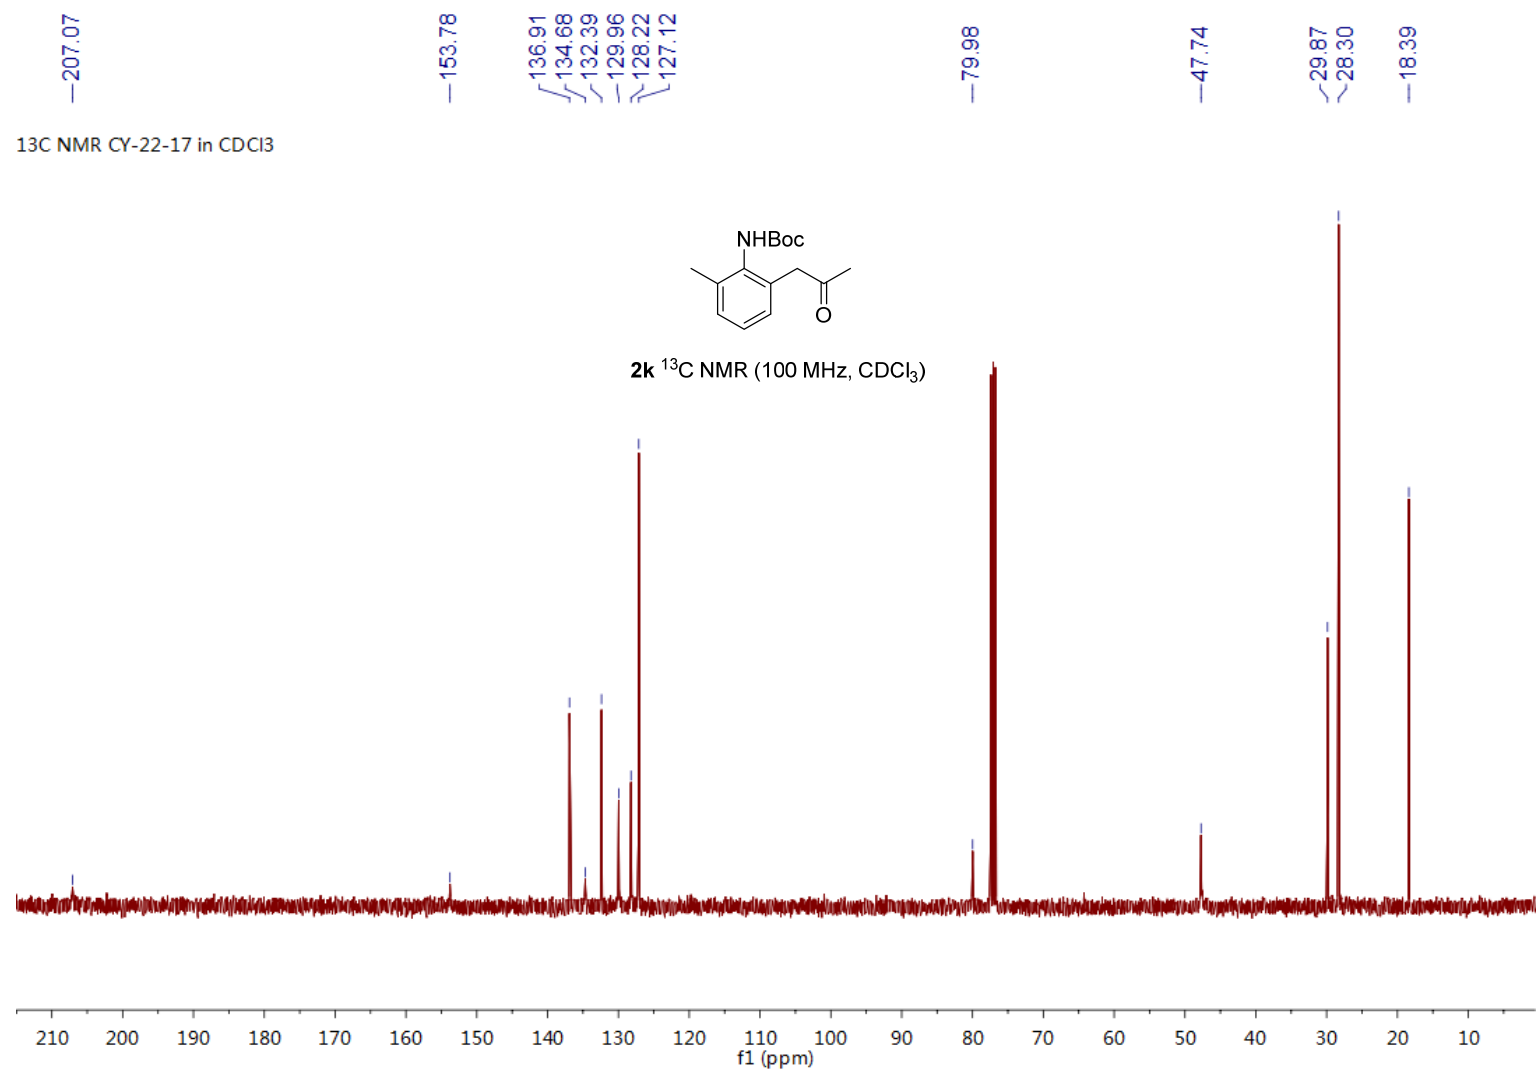



<sup>1</sup>H NMR JW-9-7 in CDCl<sub>3</sub>

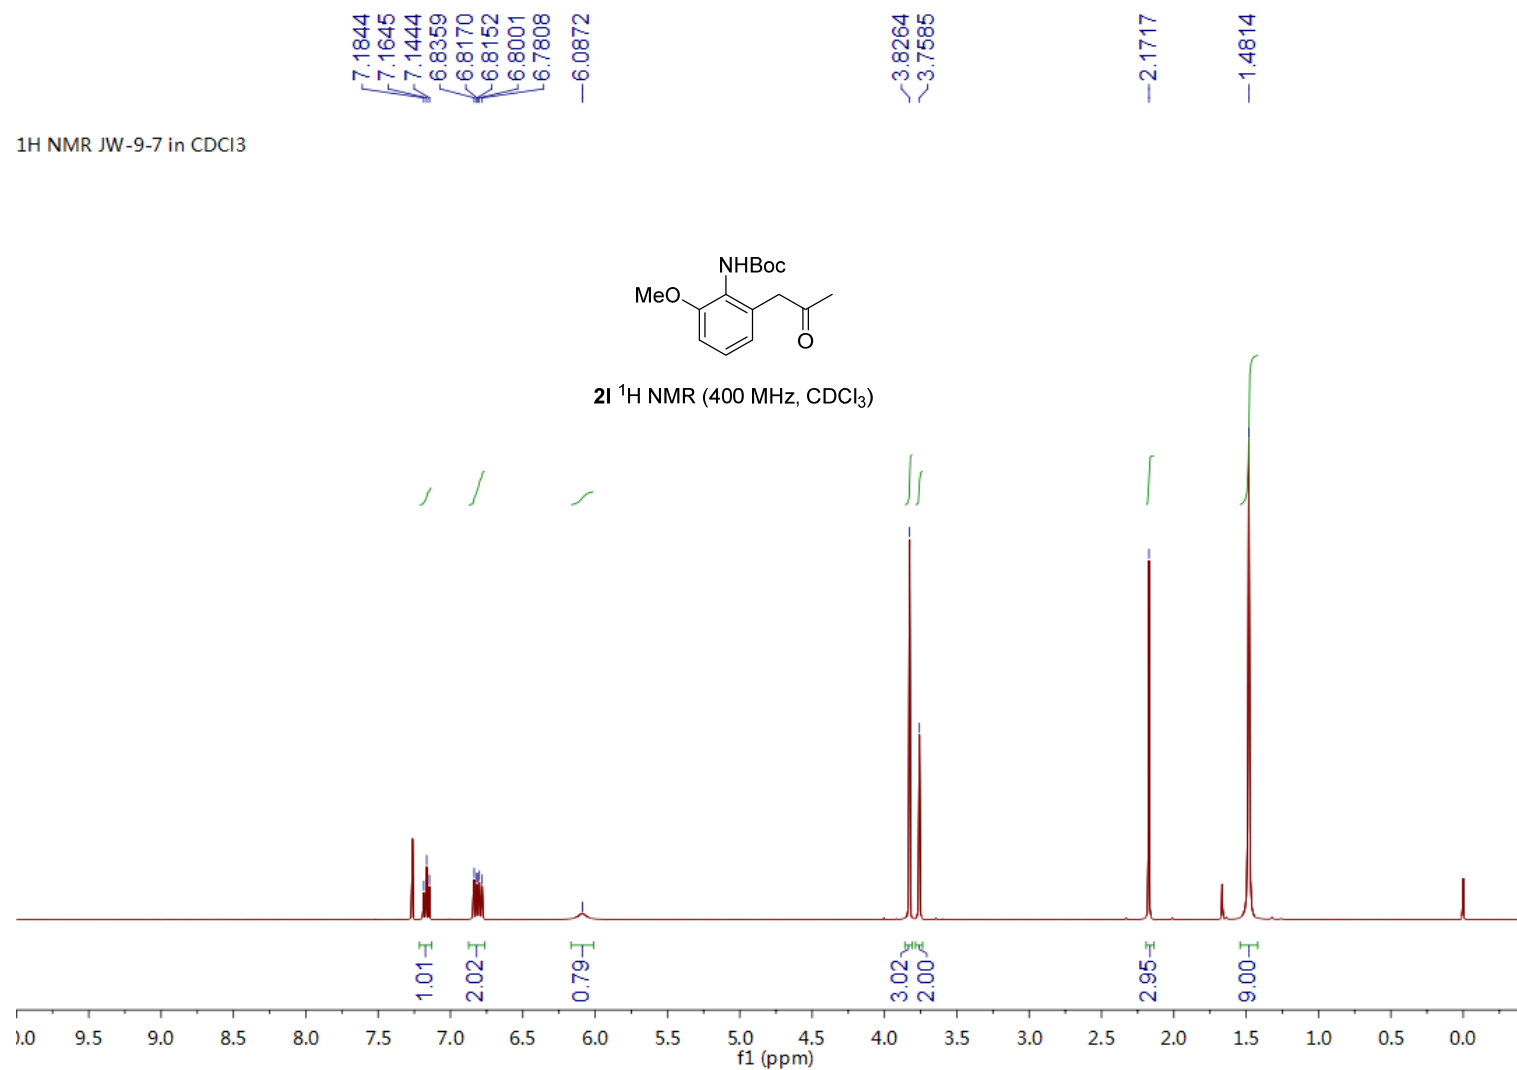

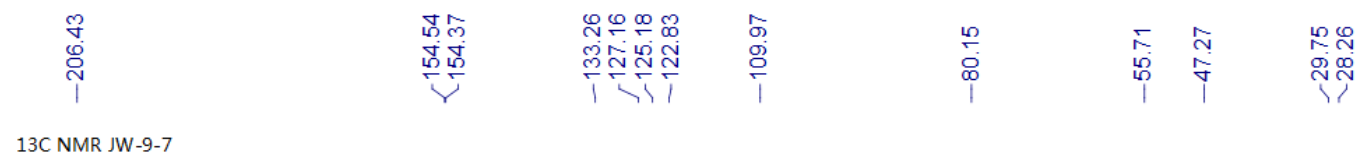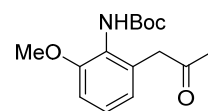

2I <sup>13</sup>C NMR (100 MHz, CDCl<sub>3</sub>)

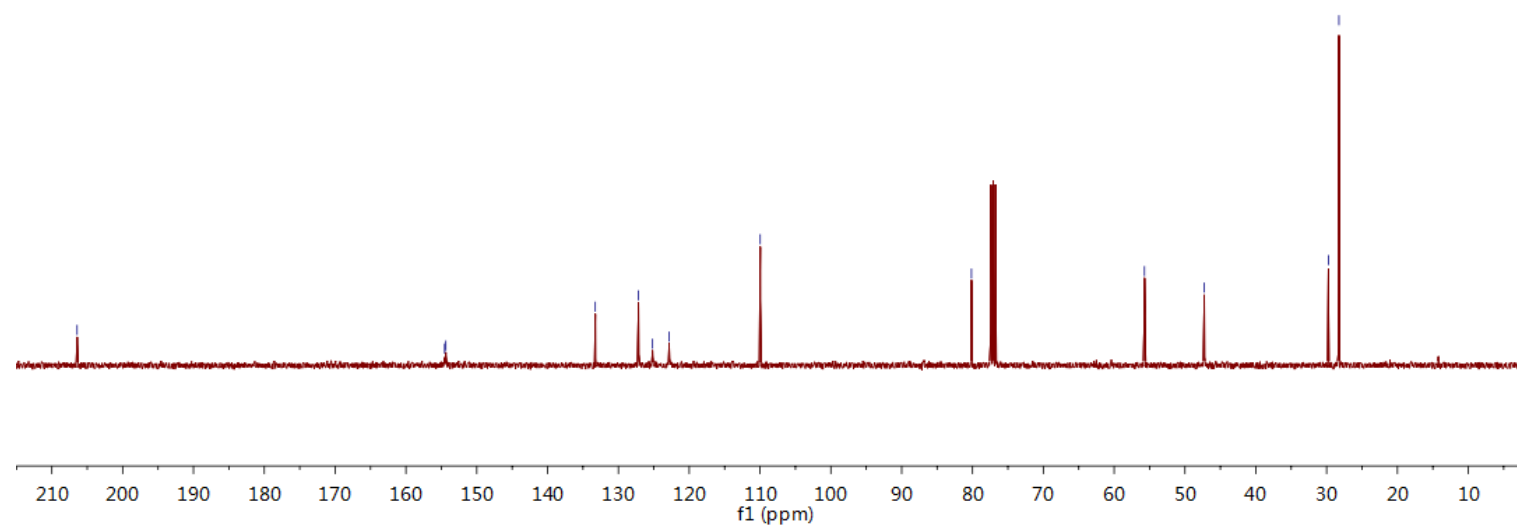

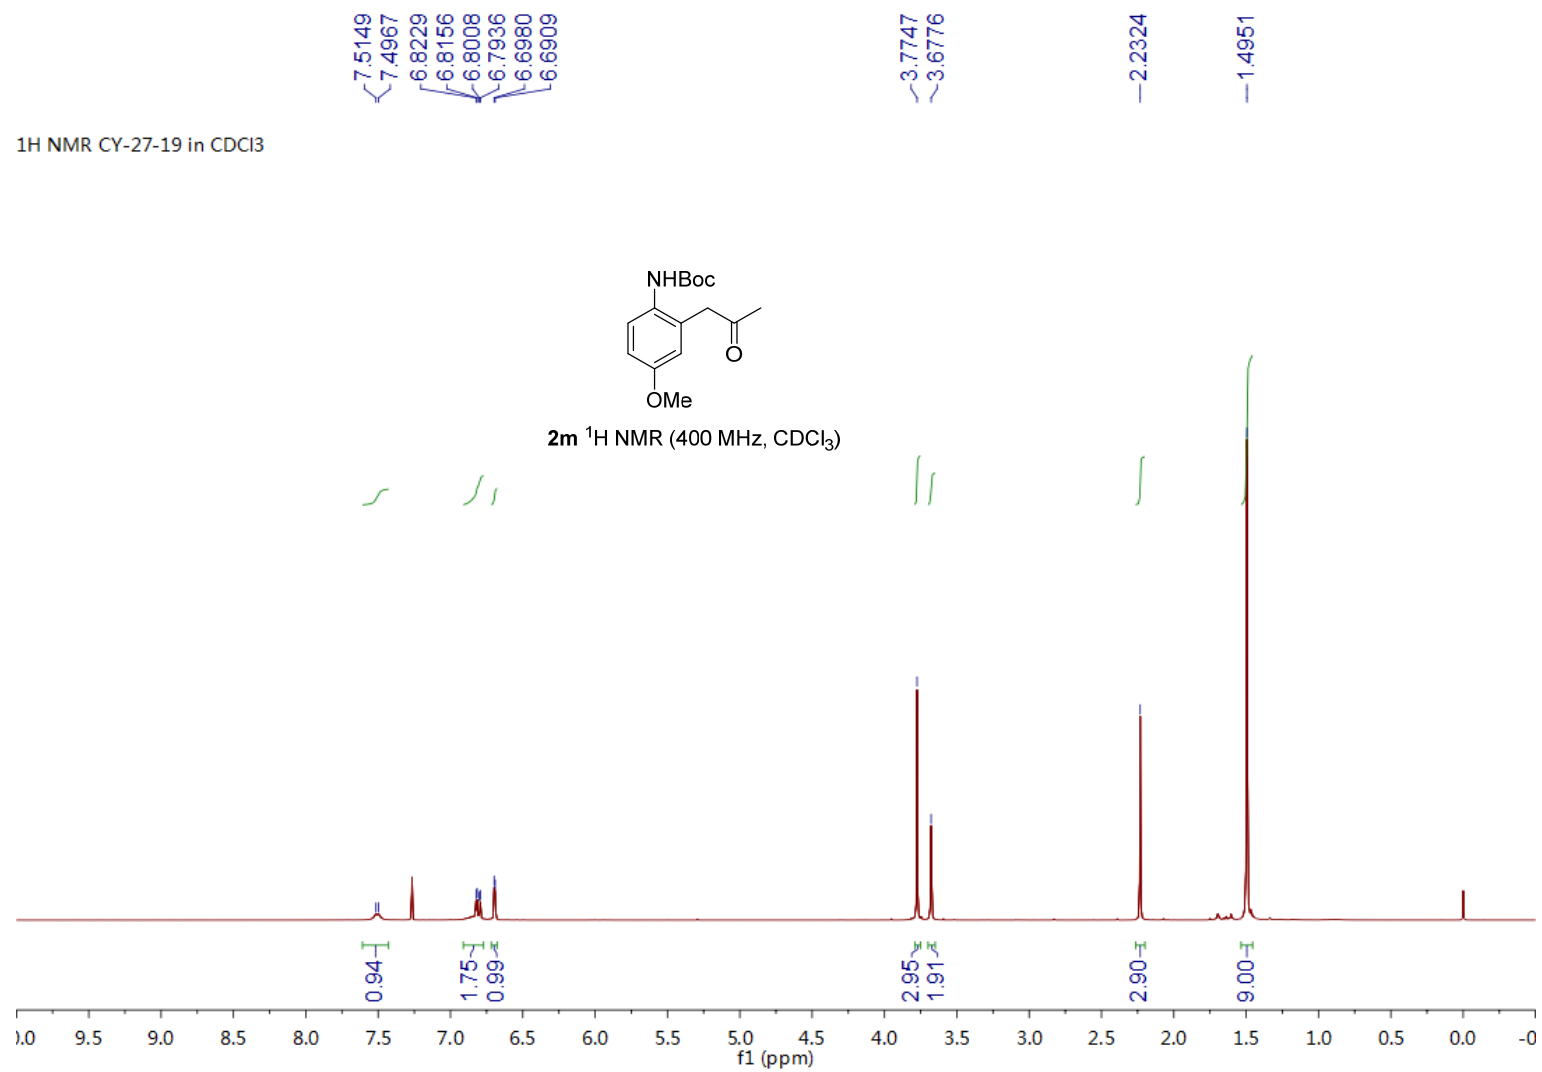

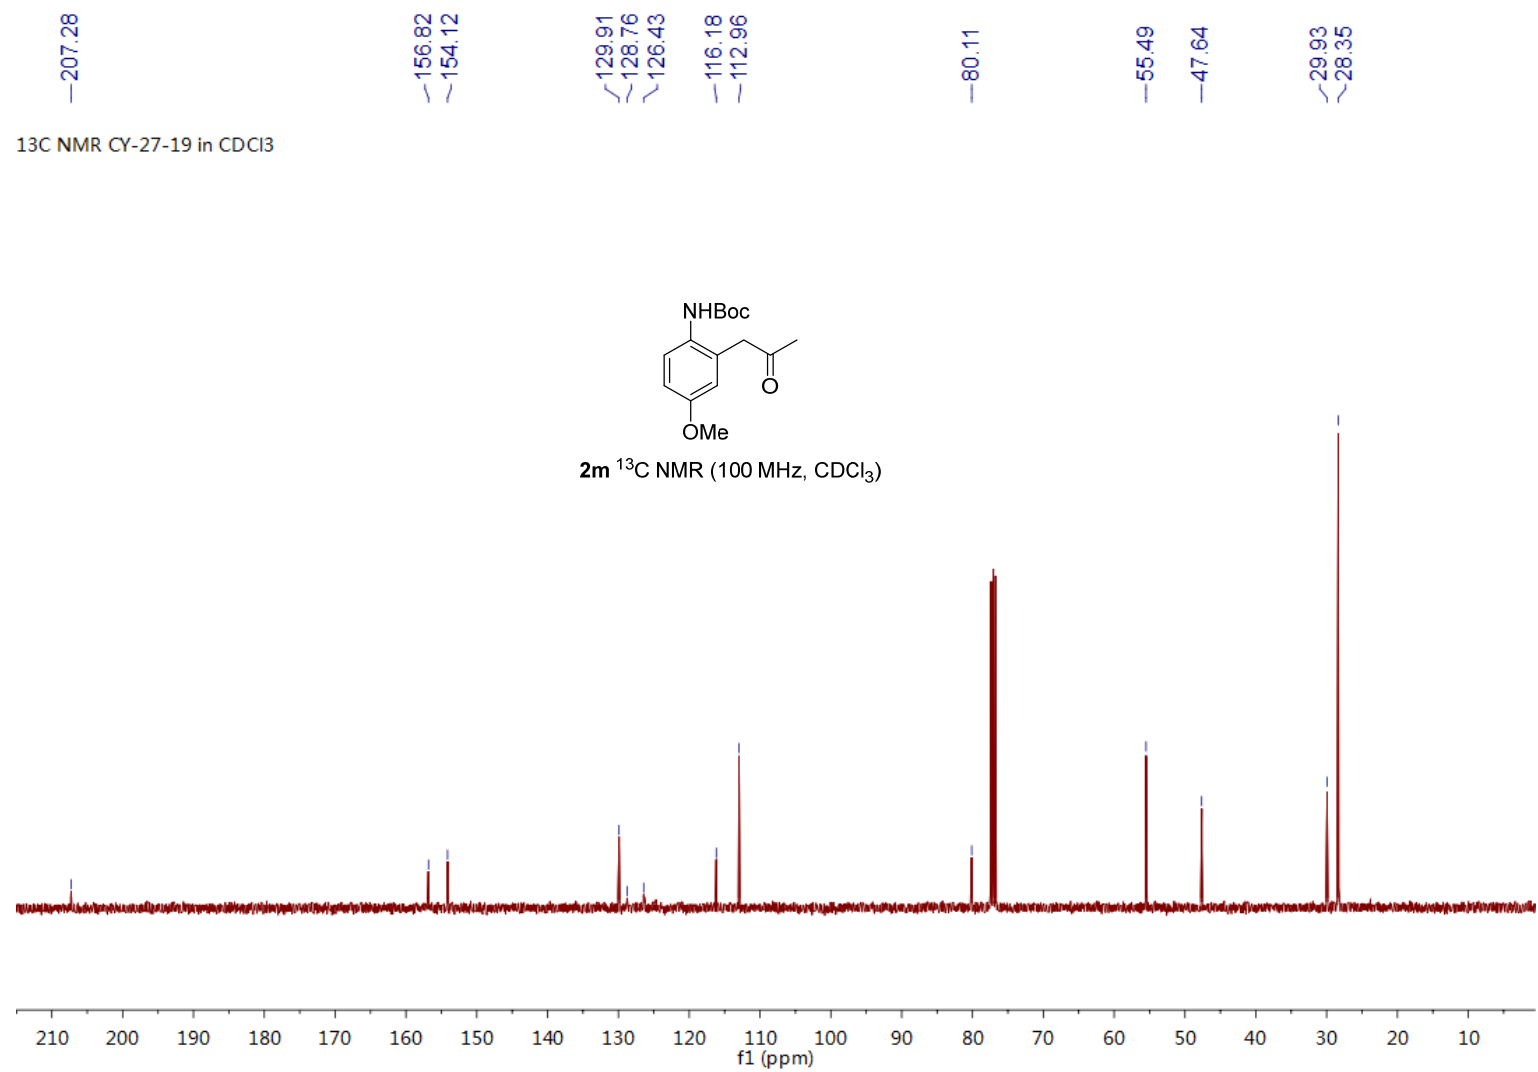

<sup>1</sup>H NMR CY-27-22 in CDCl<sub>3</sub>

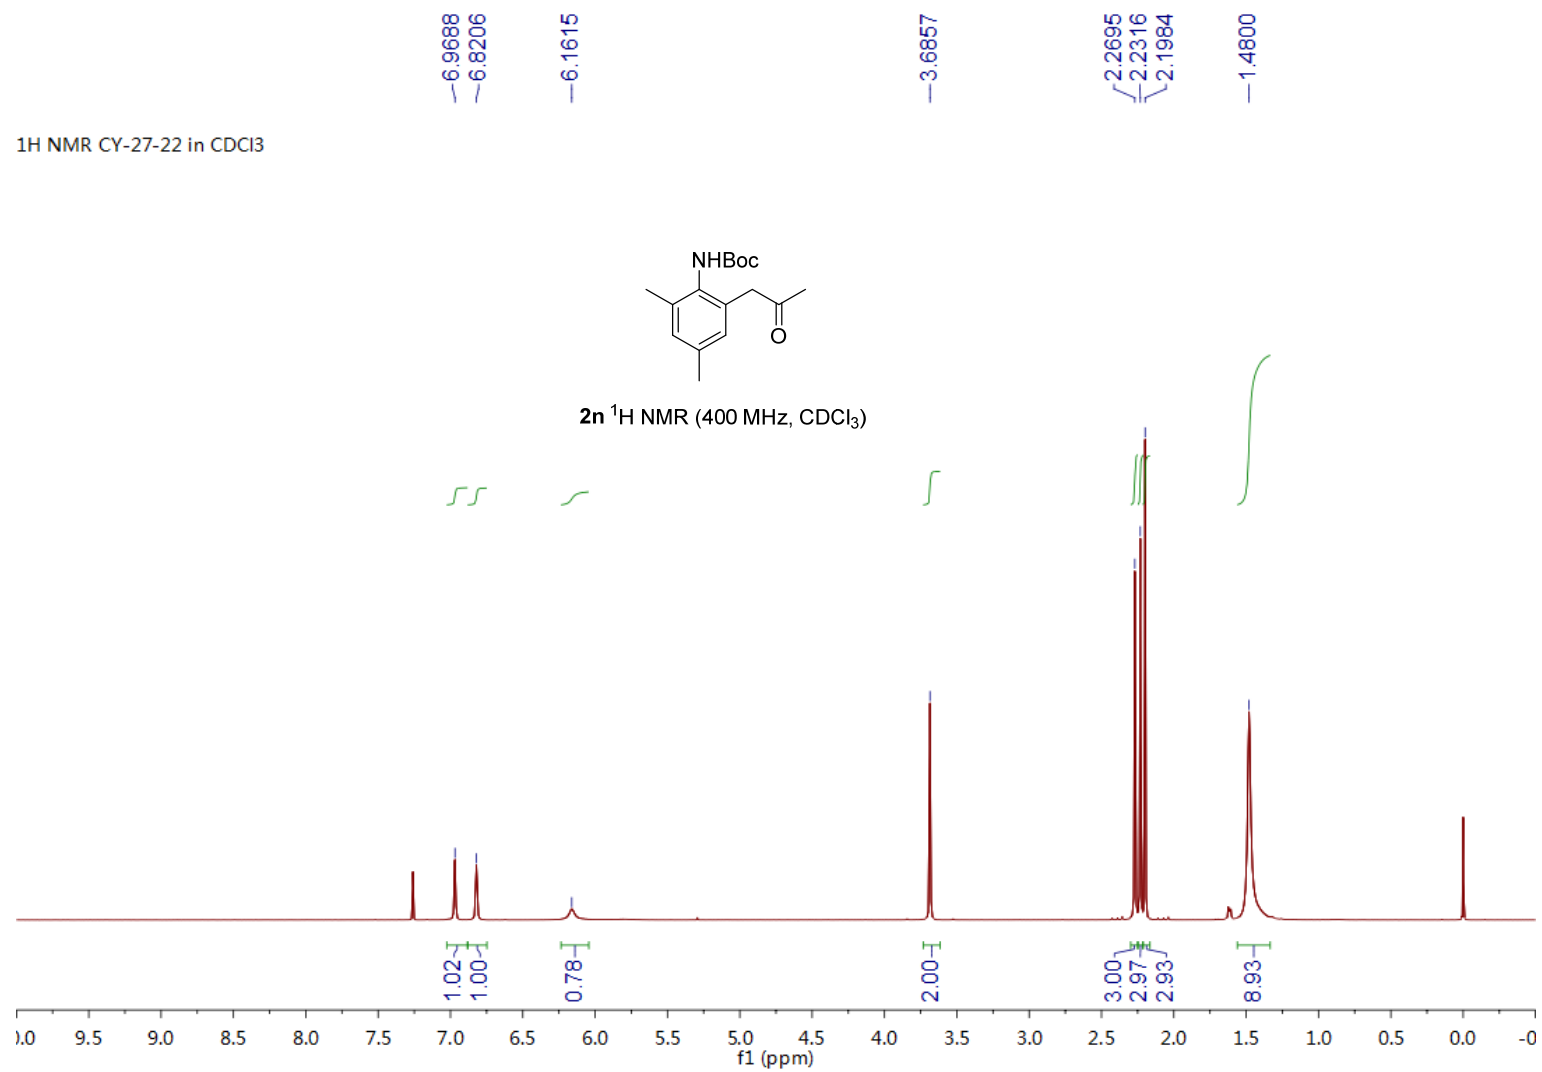

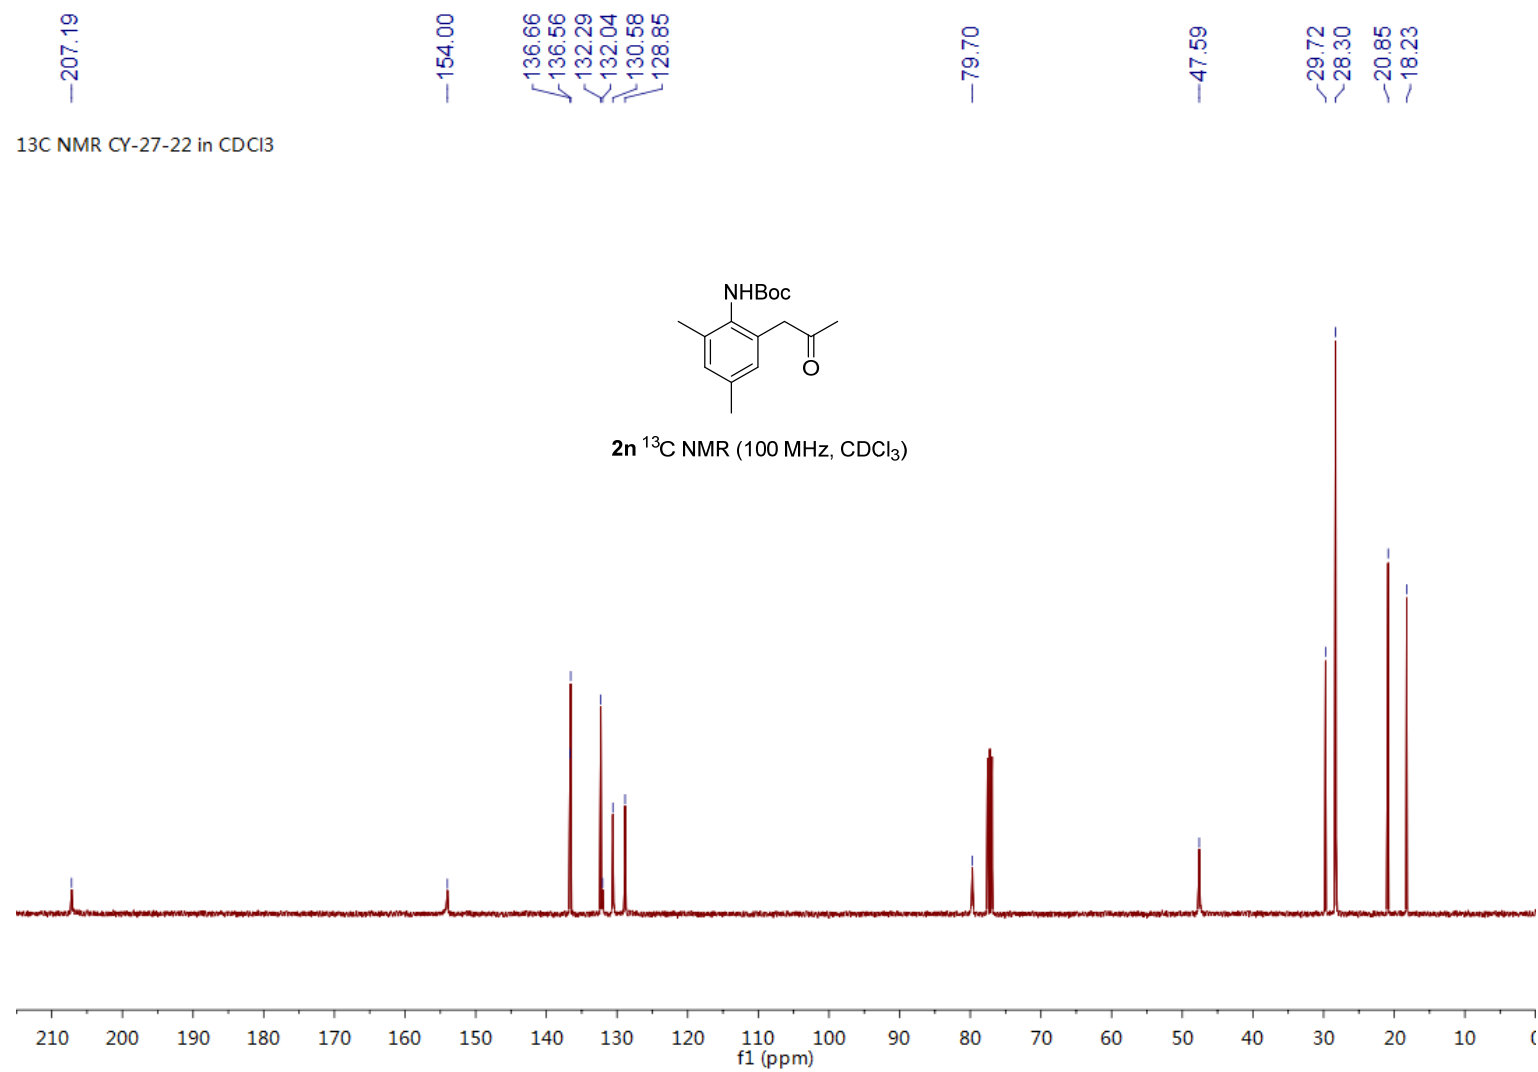

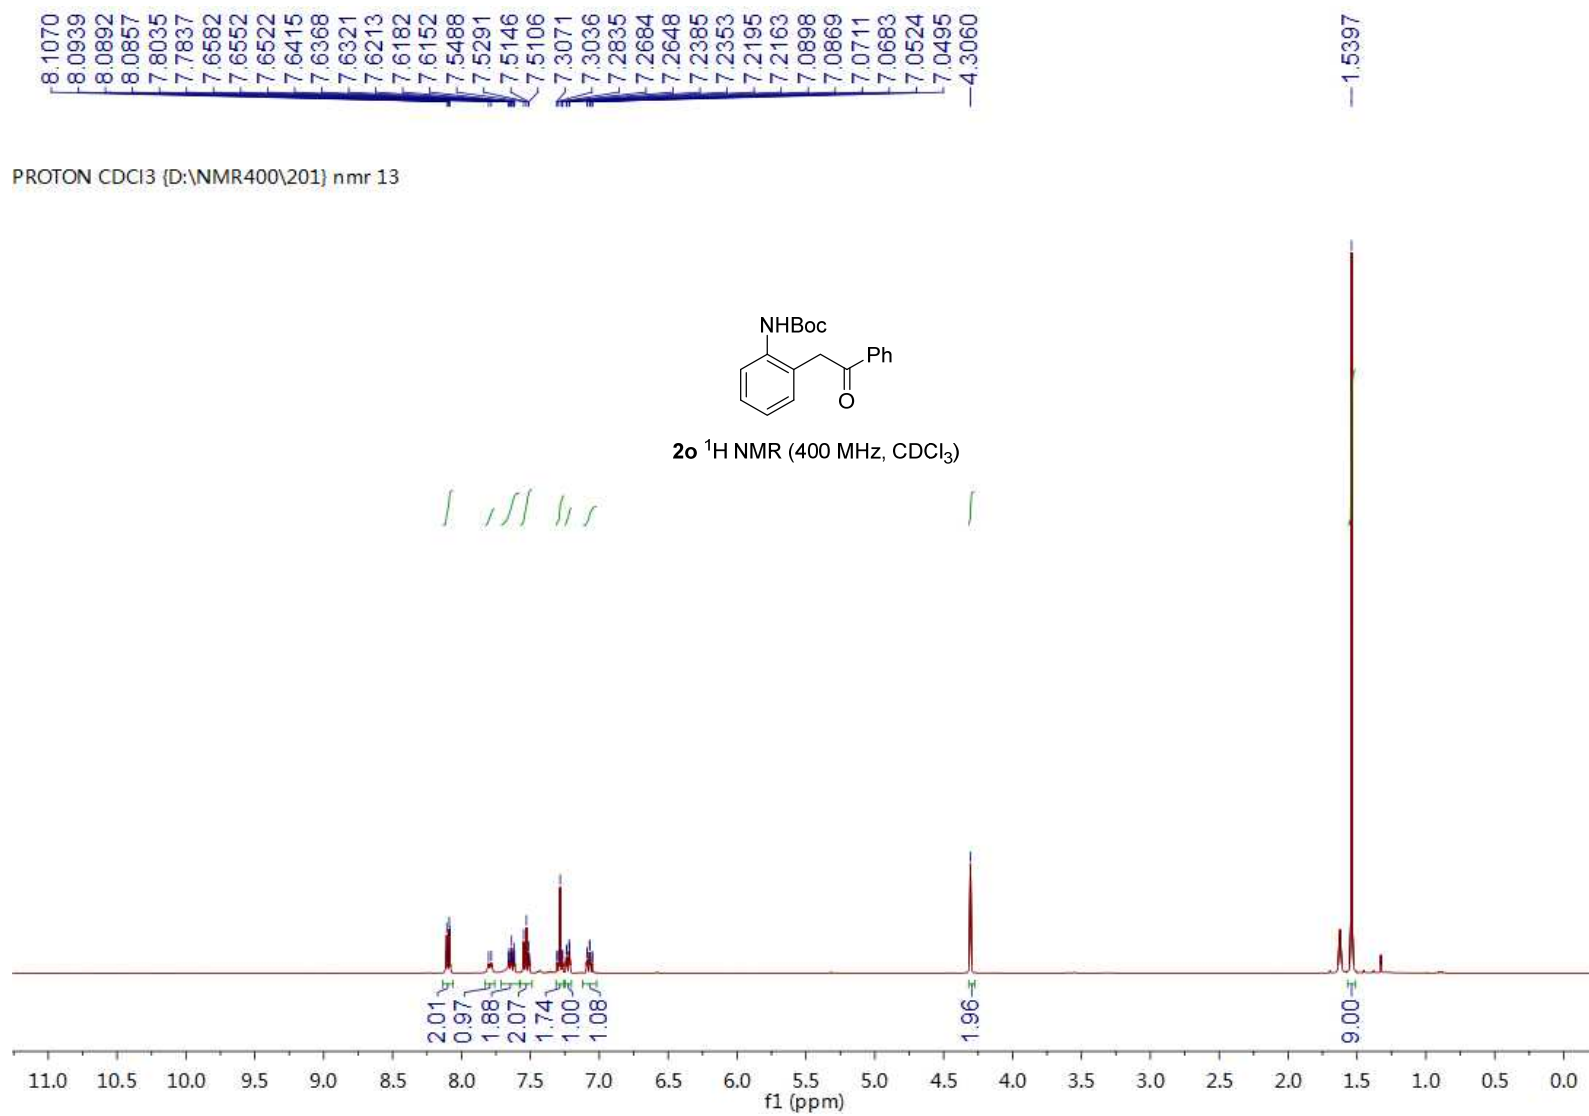

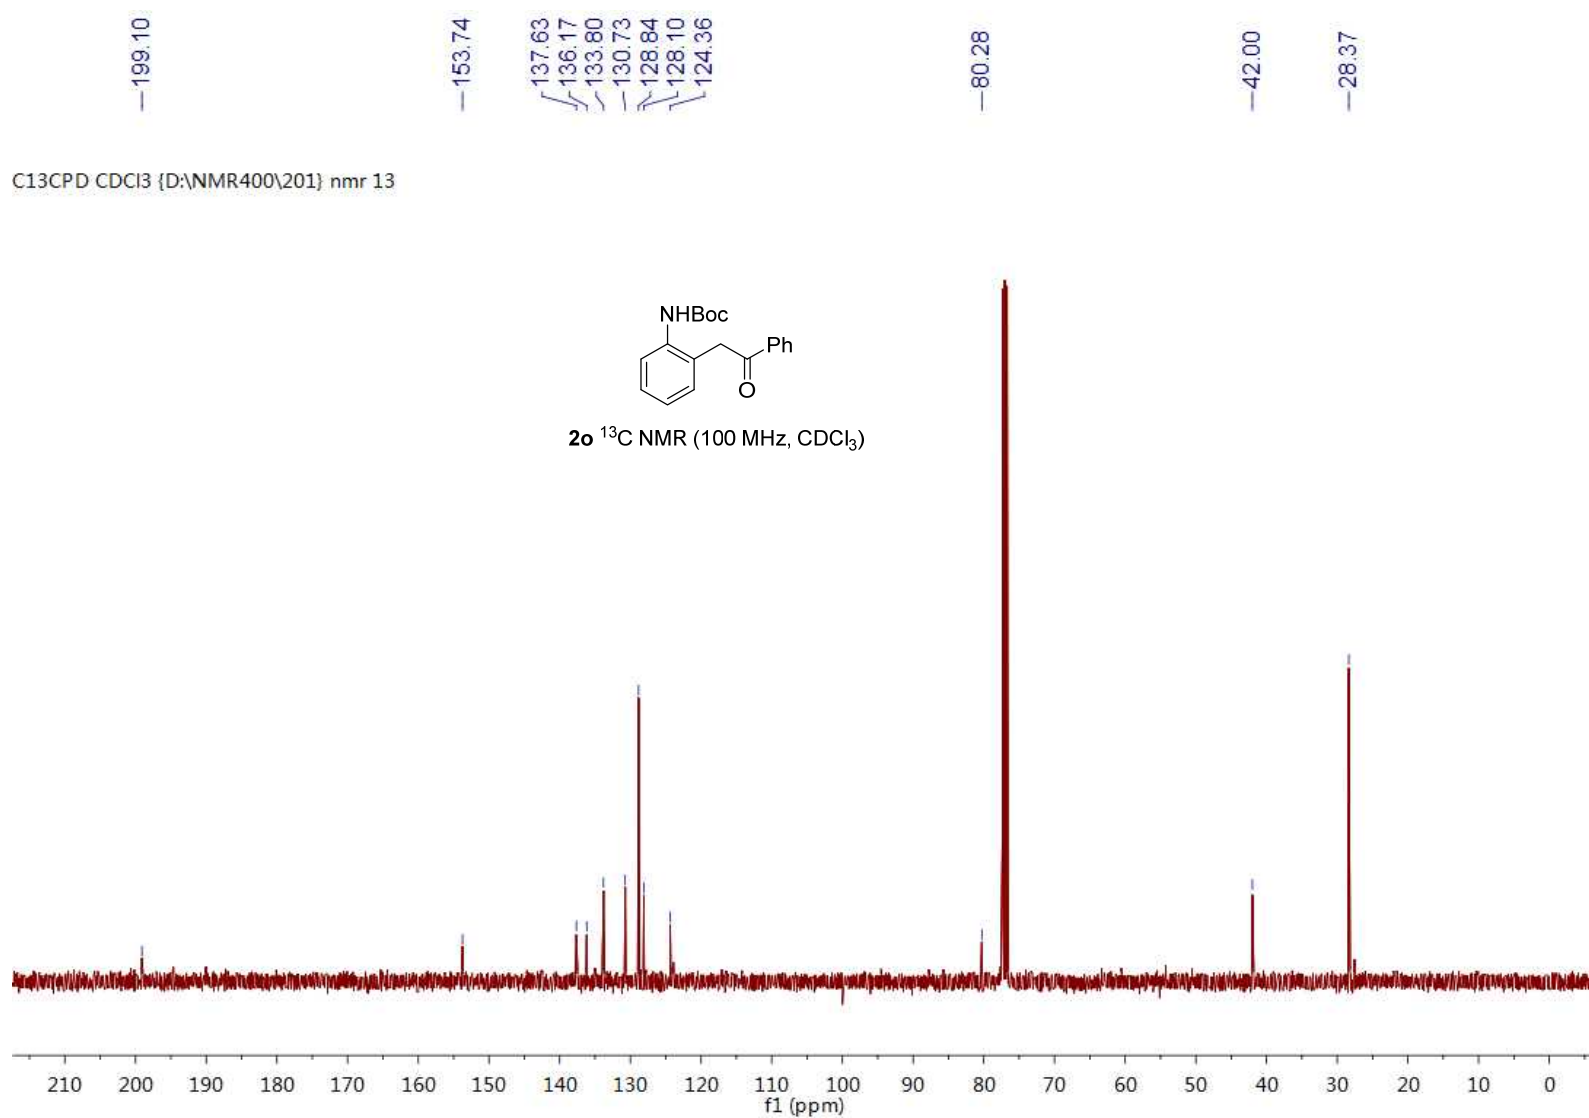



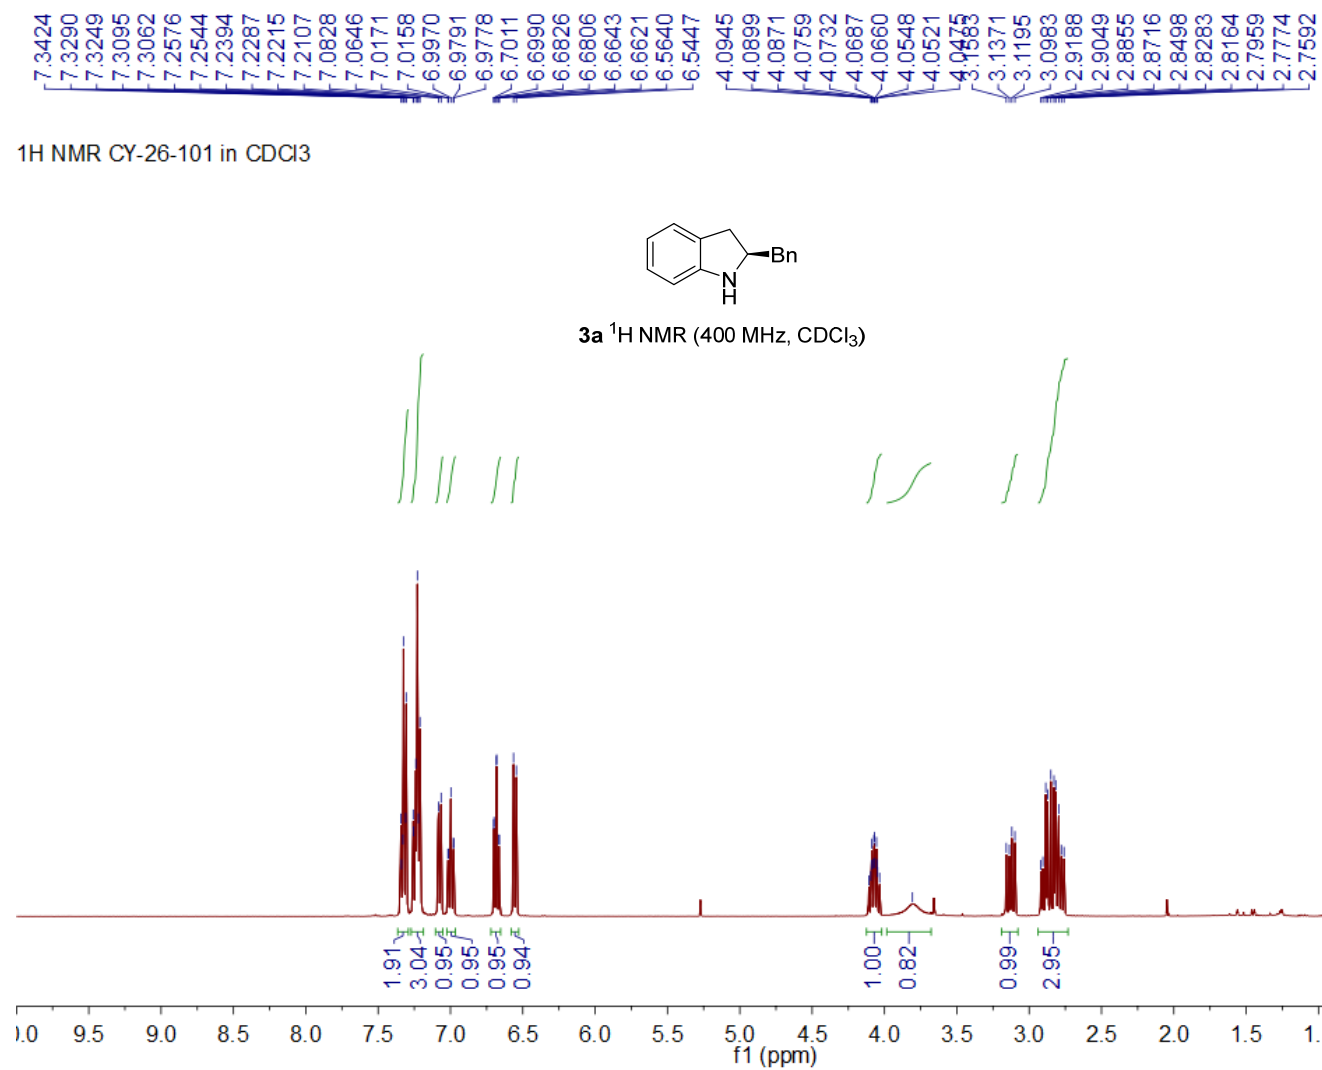

—150.55  
 —139.11  
 129.16  
 128.67  
 127.37  
 126.47  
 124.84  
 118.85  
 —109.12  
 —61.03  
 —42.72  
 —35.95

<sup>13</sup>C NMR CY-26-101 in CDCl<sub>3</sub>

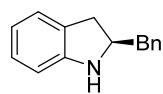

**3a** <sup>13</sup>C NMR (100 MHz, CDCl<sub>3</sub>)

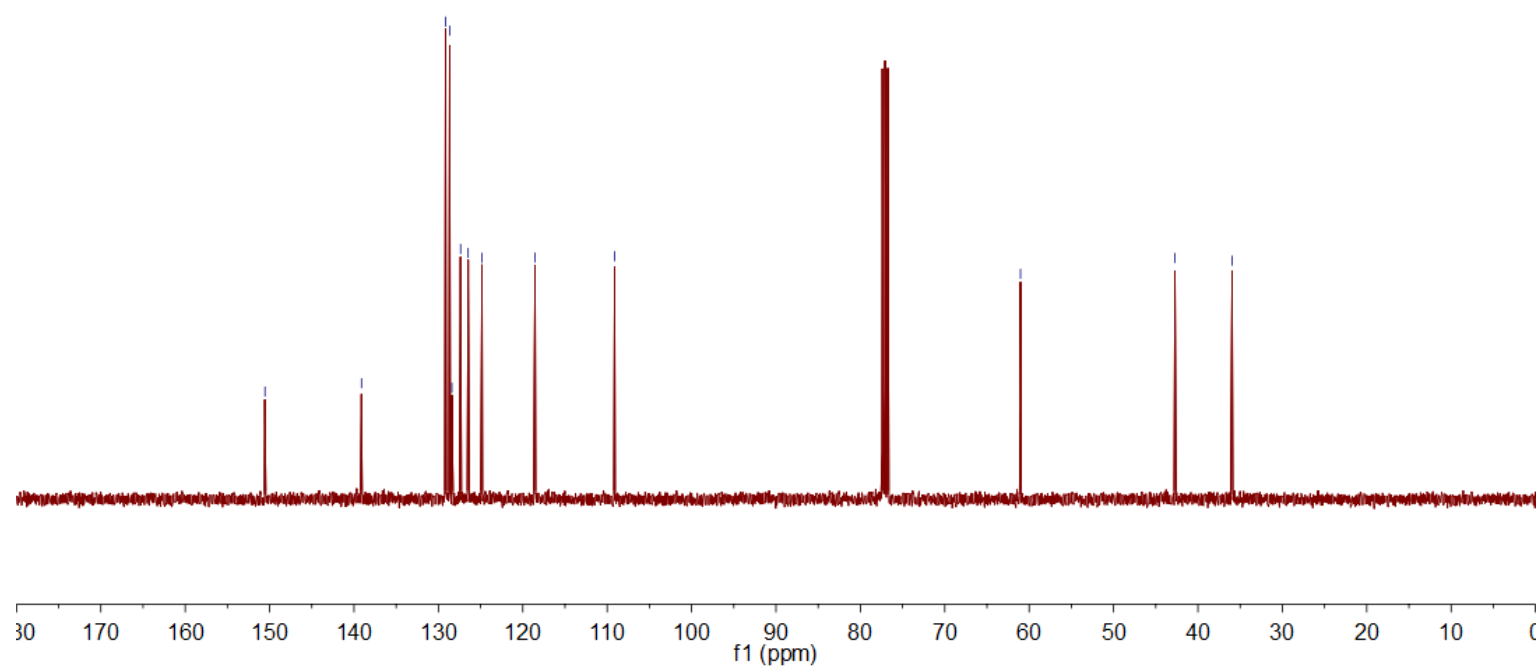

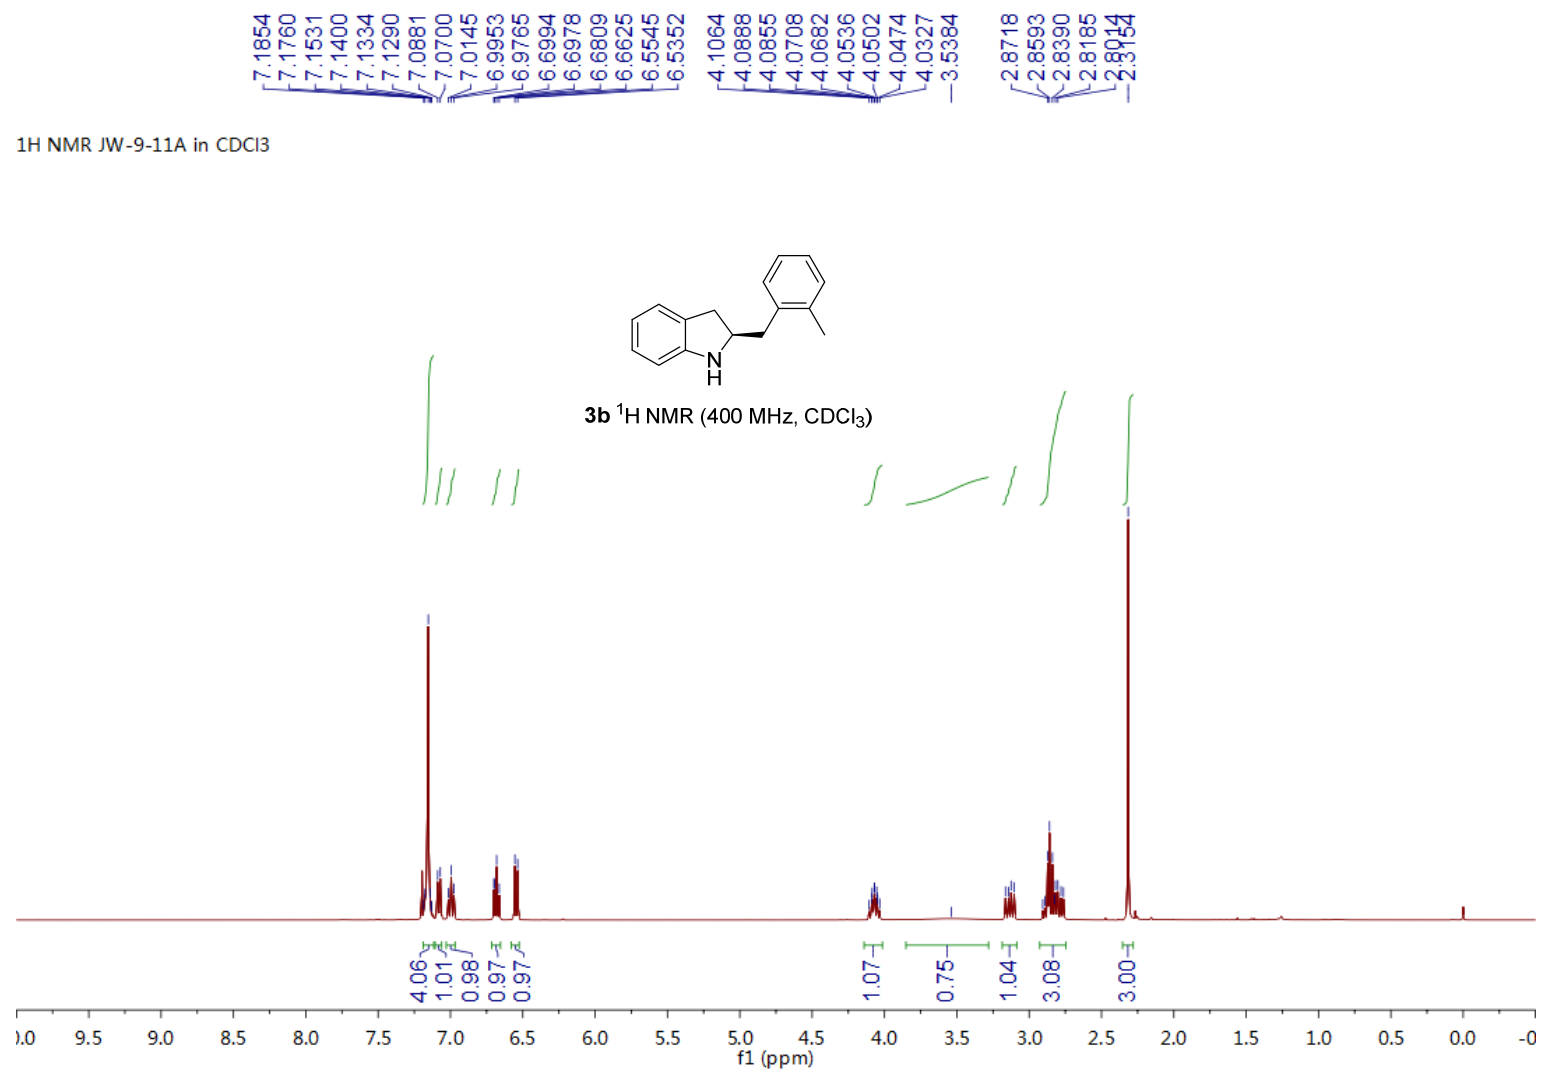

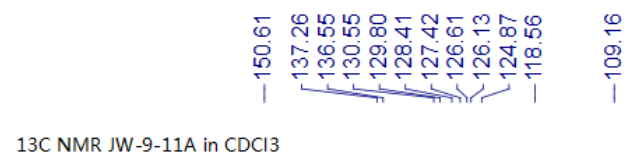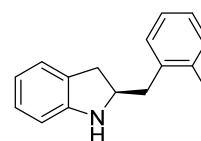

**3b** <sup>13</sup>C NMR (100 MHz, CDCl<sub>3</sub>)

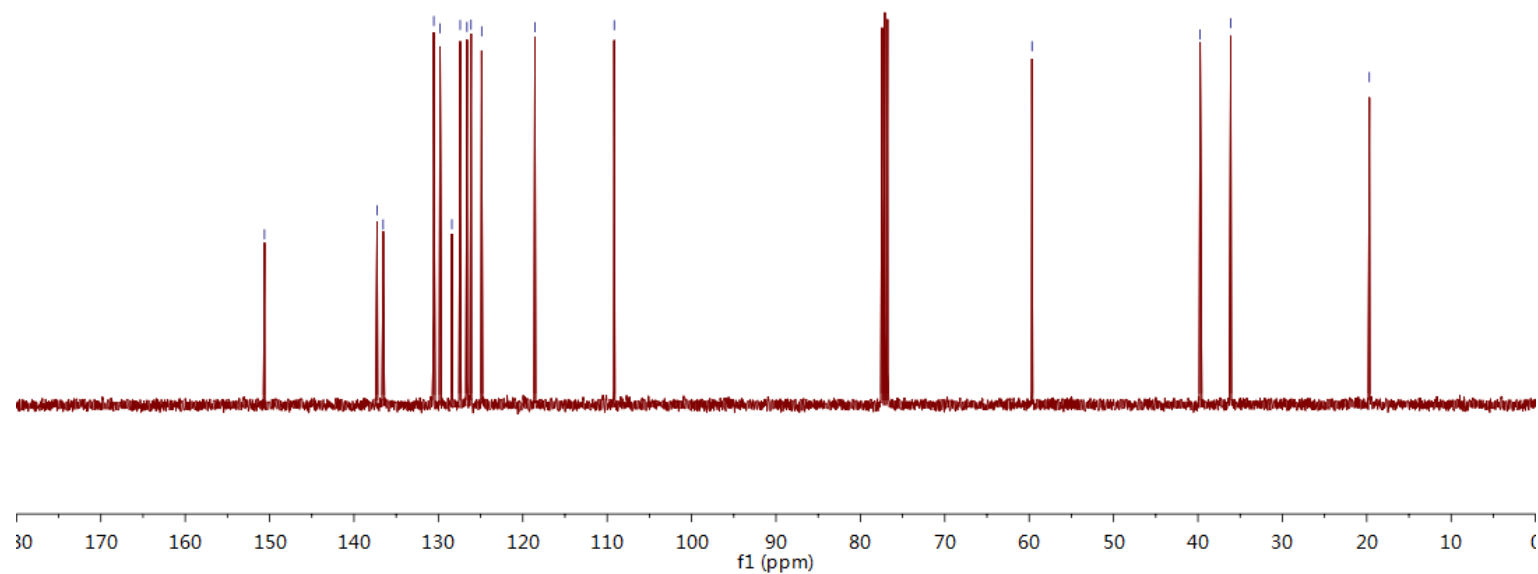

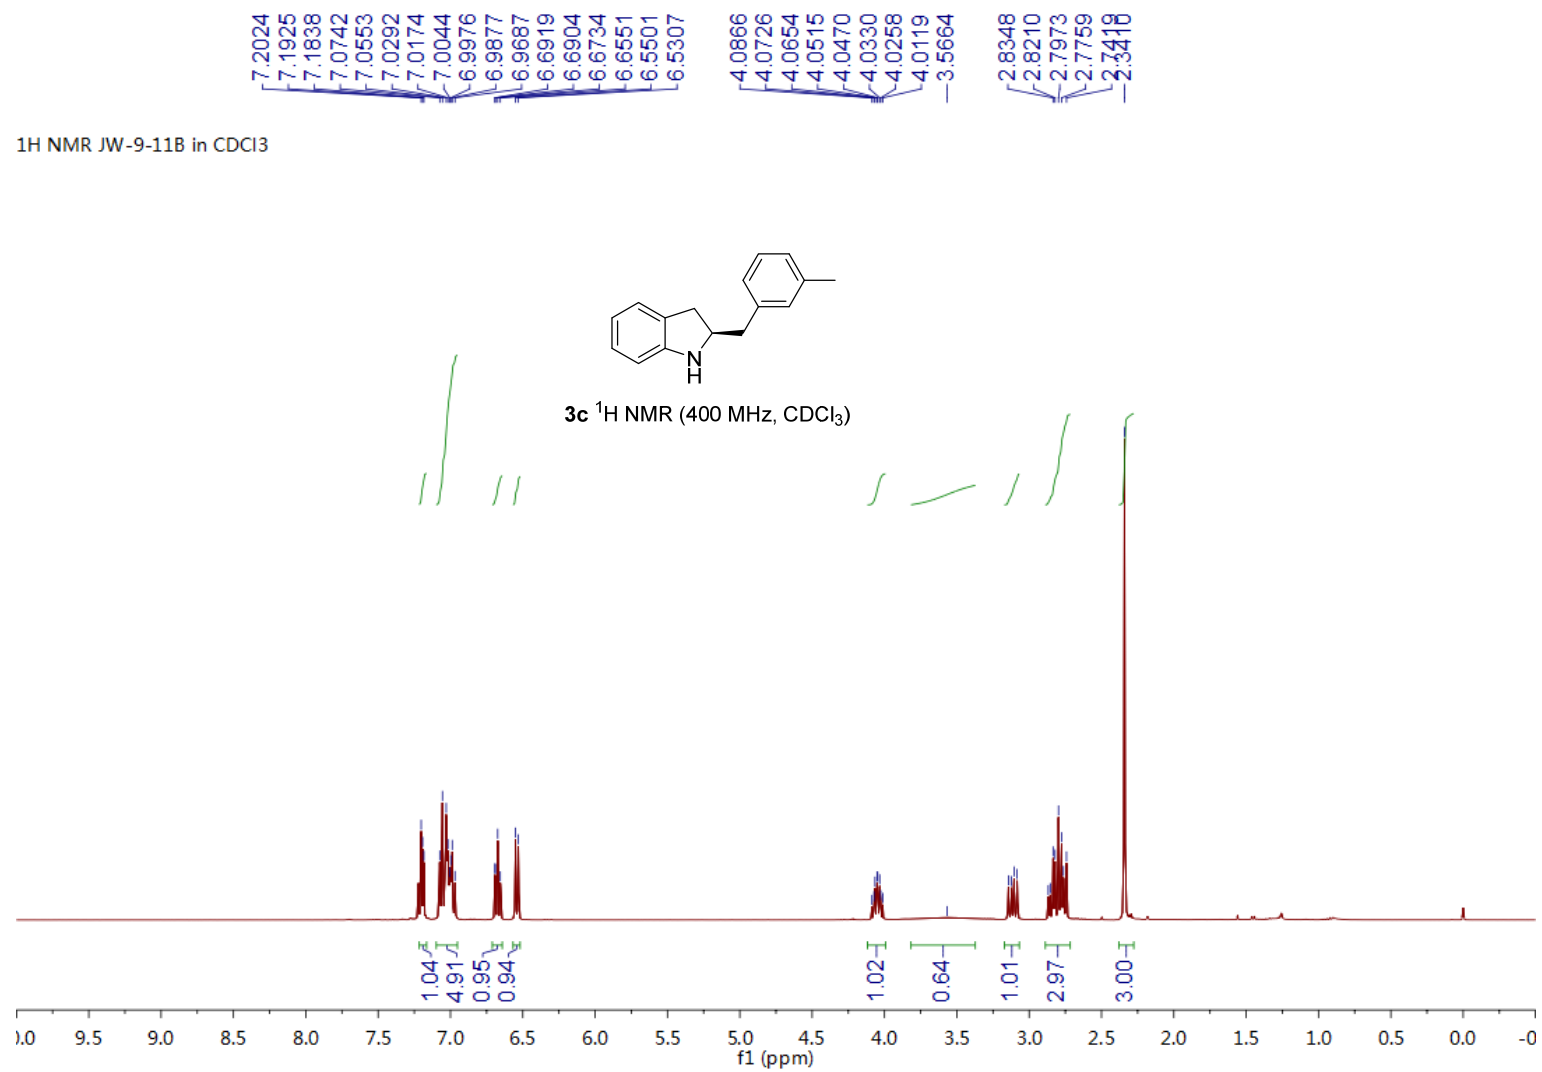

<sup>13</sup>C NMR JW-9-11B in CDCl<sub>3</sub>  
 —150.61  
 —139.07  
 —138.28  
 —129.96  
 —127.38  
 —127.23  
 —126.17  
 —124.85  
 —109.15

—61.04  
 —42.67  
 —36.00  
 —21.50

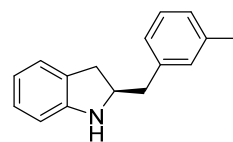

**3c** <sup>13</sup>C NMR (100 MHz, CDCl<sub>3</sub>)

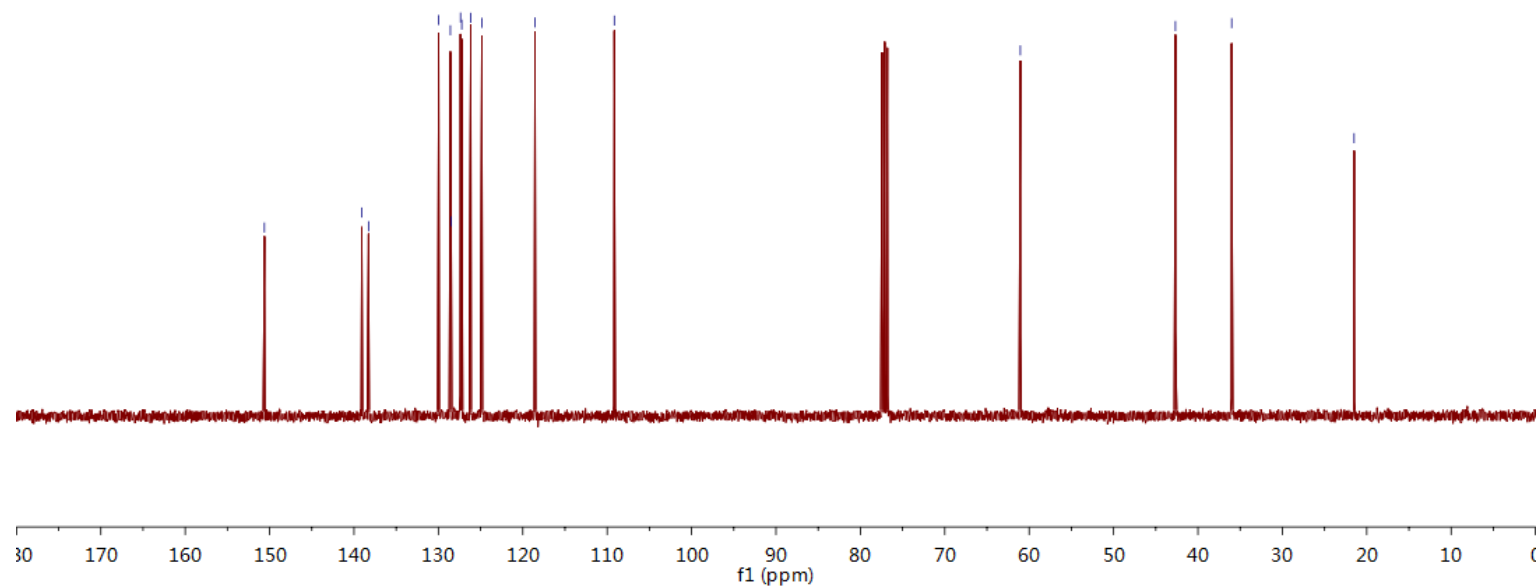

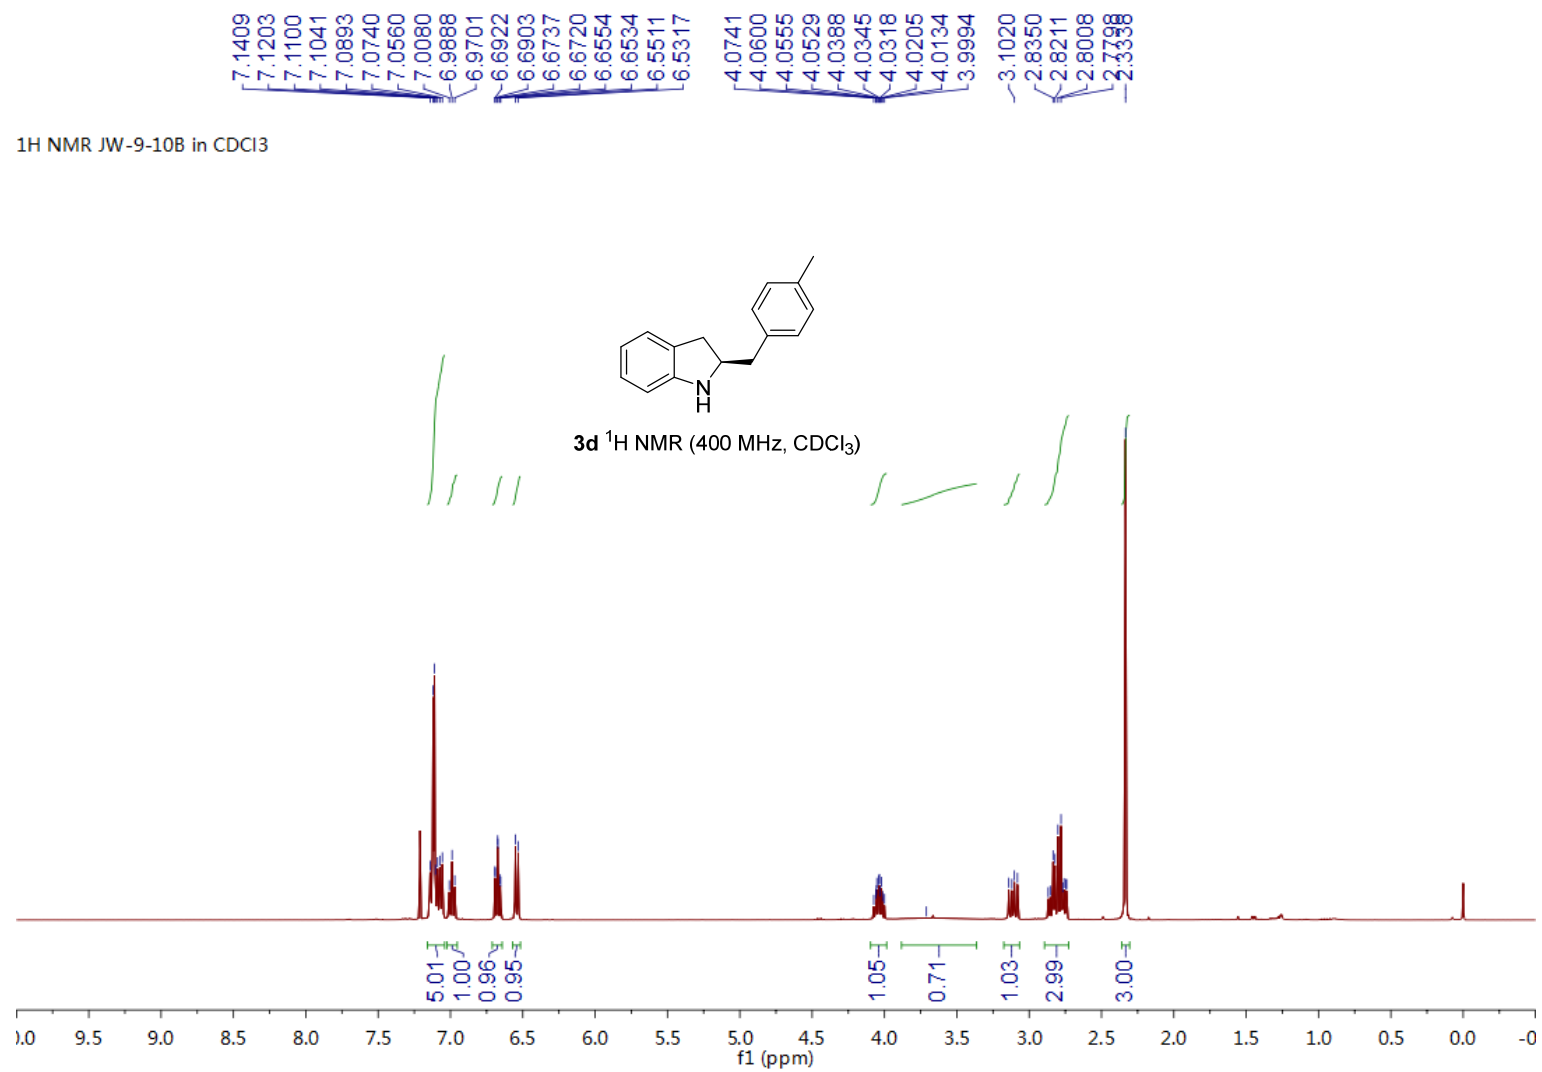

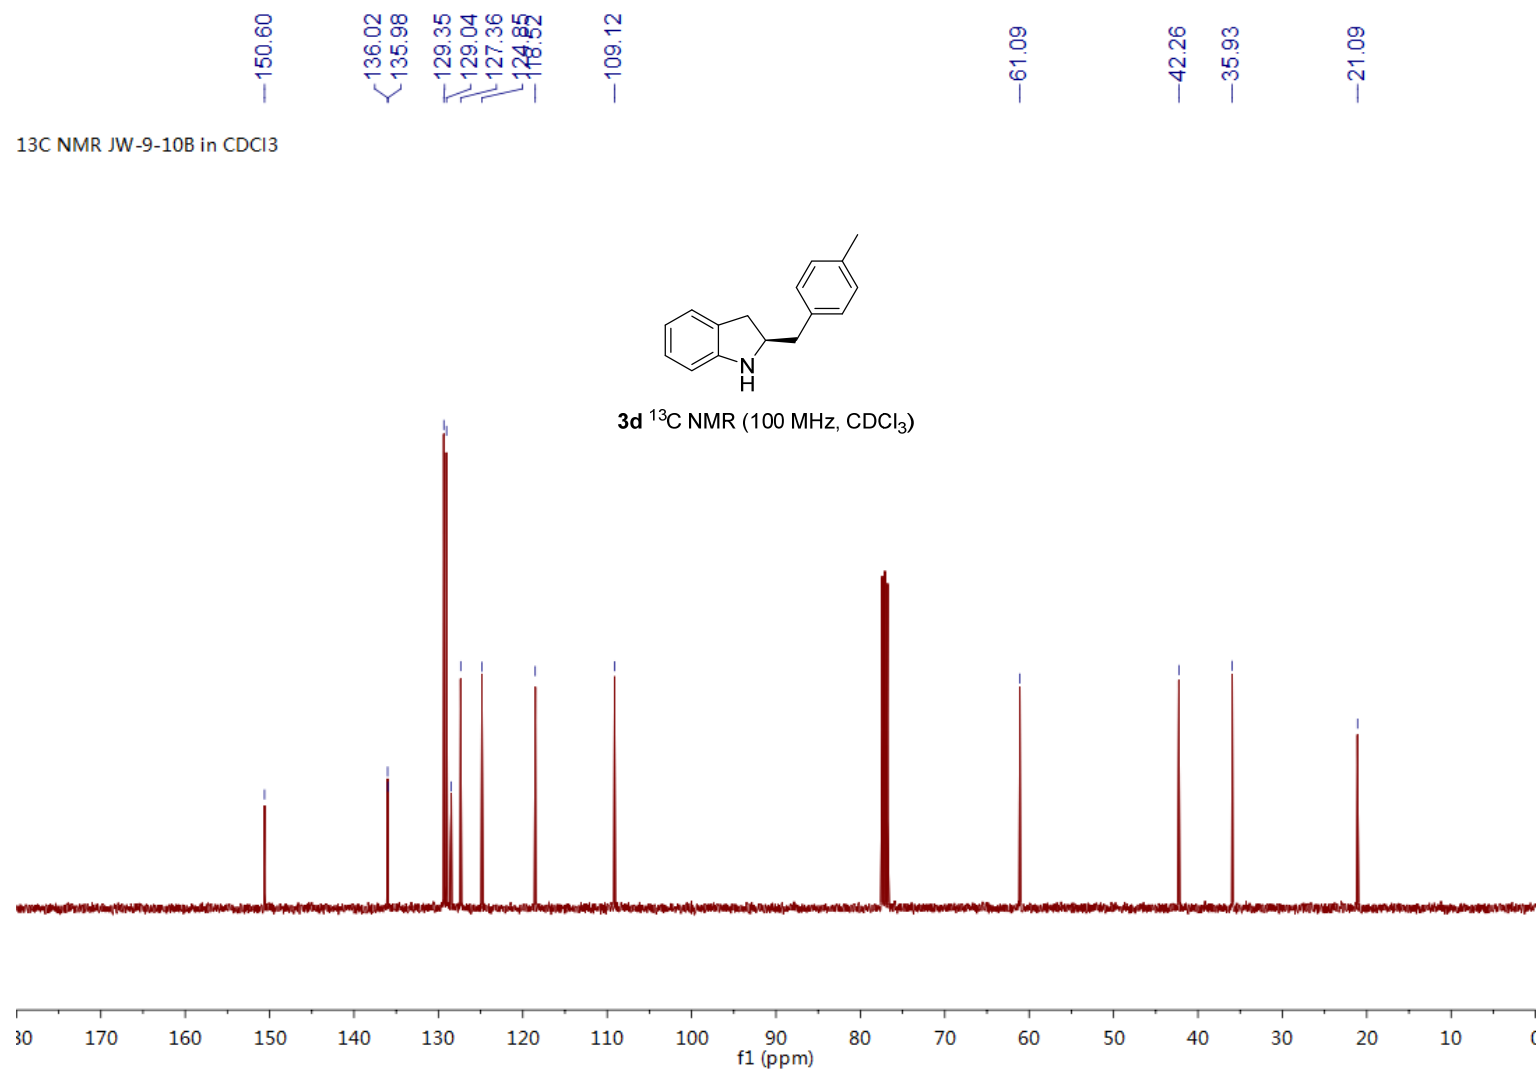



<sup>1</sup>H NMR CY-27-6 in CDCl<sub>3</sub>

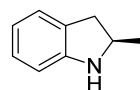

**3e** <sup>1</sup>H NMR (400 MHz, CDCl<sub>3</sub>)

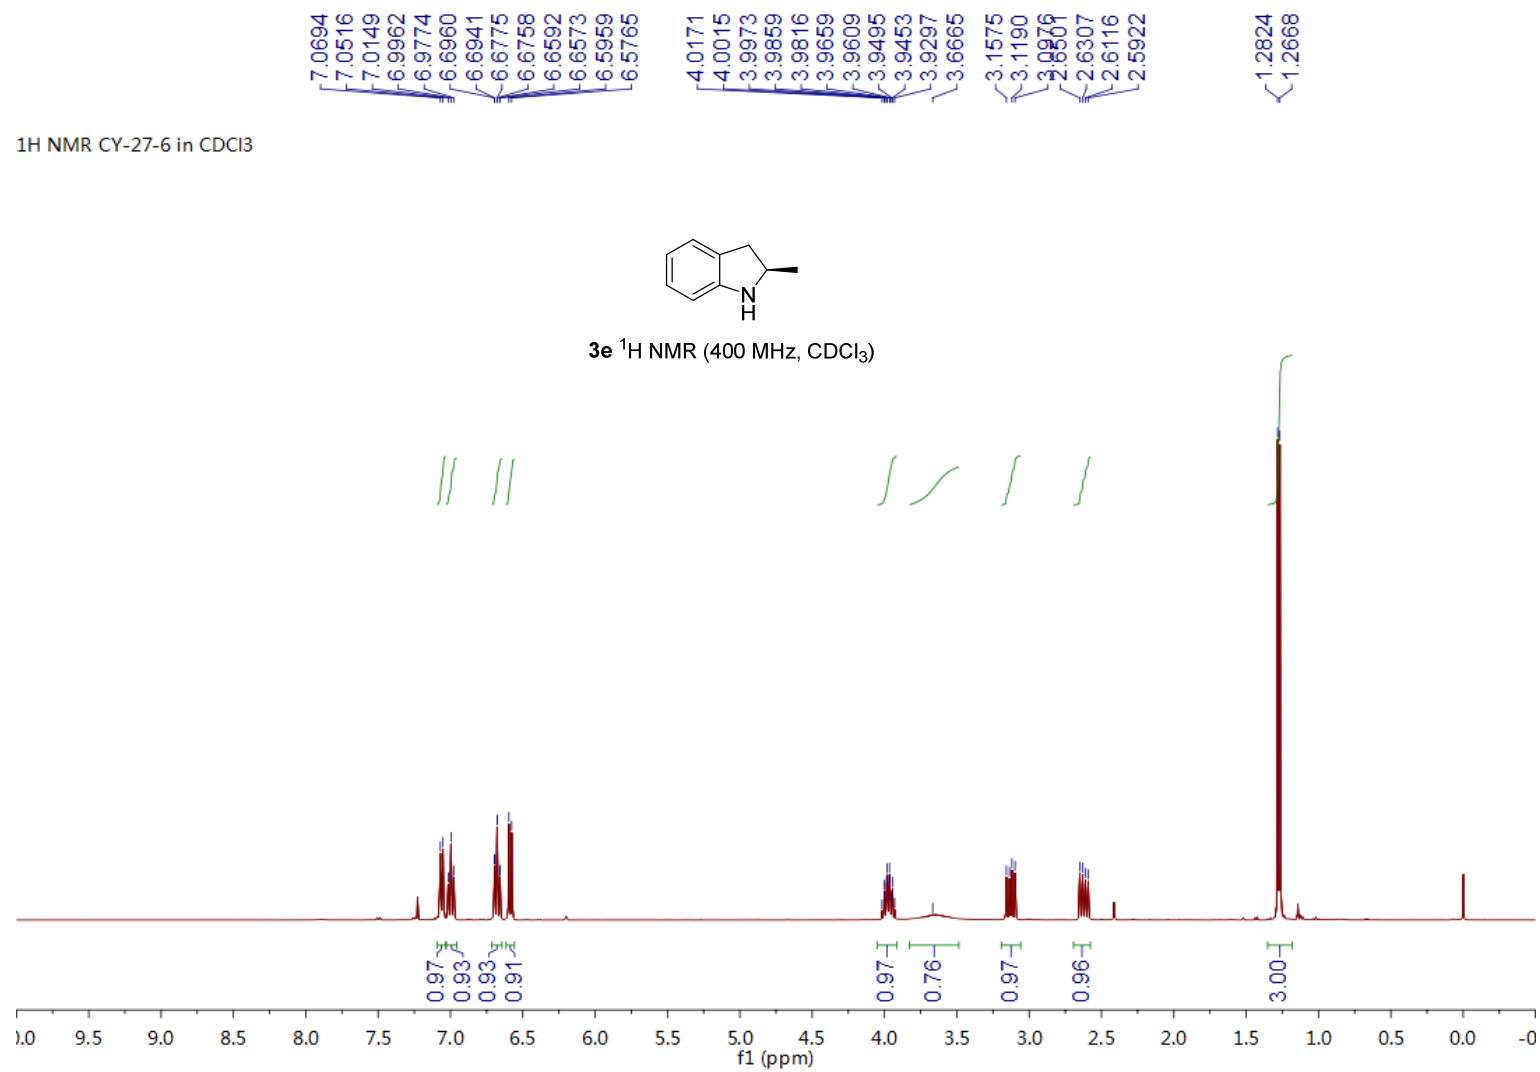

150.98  
13C NMR CY-27-6 in CDCl<sub>3</sub>

128.91  
127.26  
124.74  
118.55  
109.19

55.24

37.79

22.30

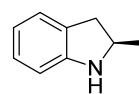

**3e** <sup>13</sup>C NMR (100 MHz, CDCl<sub>3</sub>)

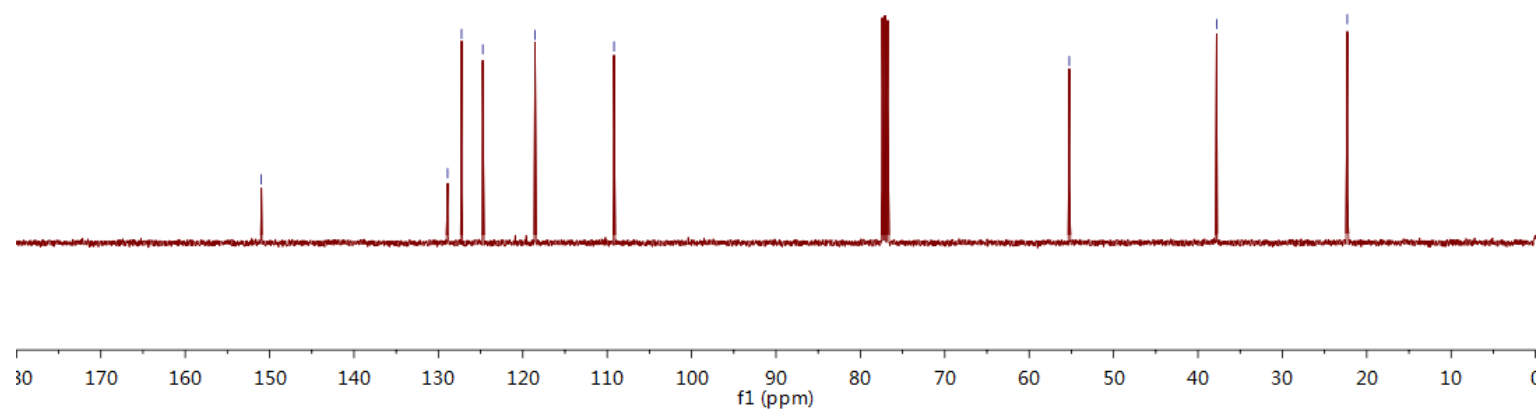

<sup>1</sup>H NMR JW-9-14B in CDCl<sub>3</sub>

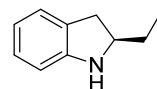

**3f** <sup>1</sup>H NMR (400 MHz, CDCl<sub>3</sub>)

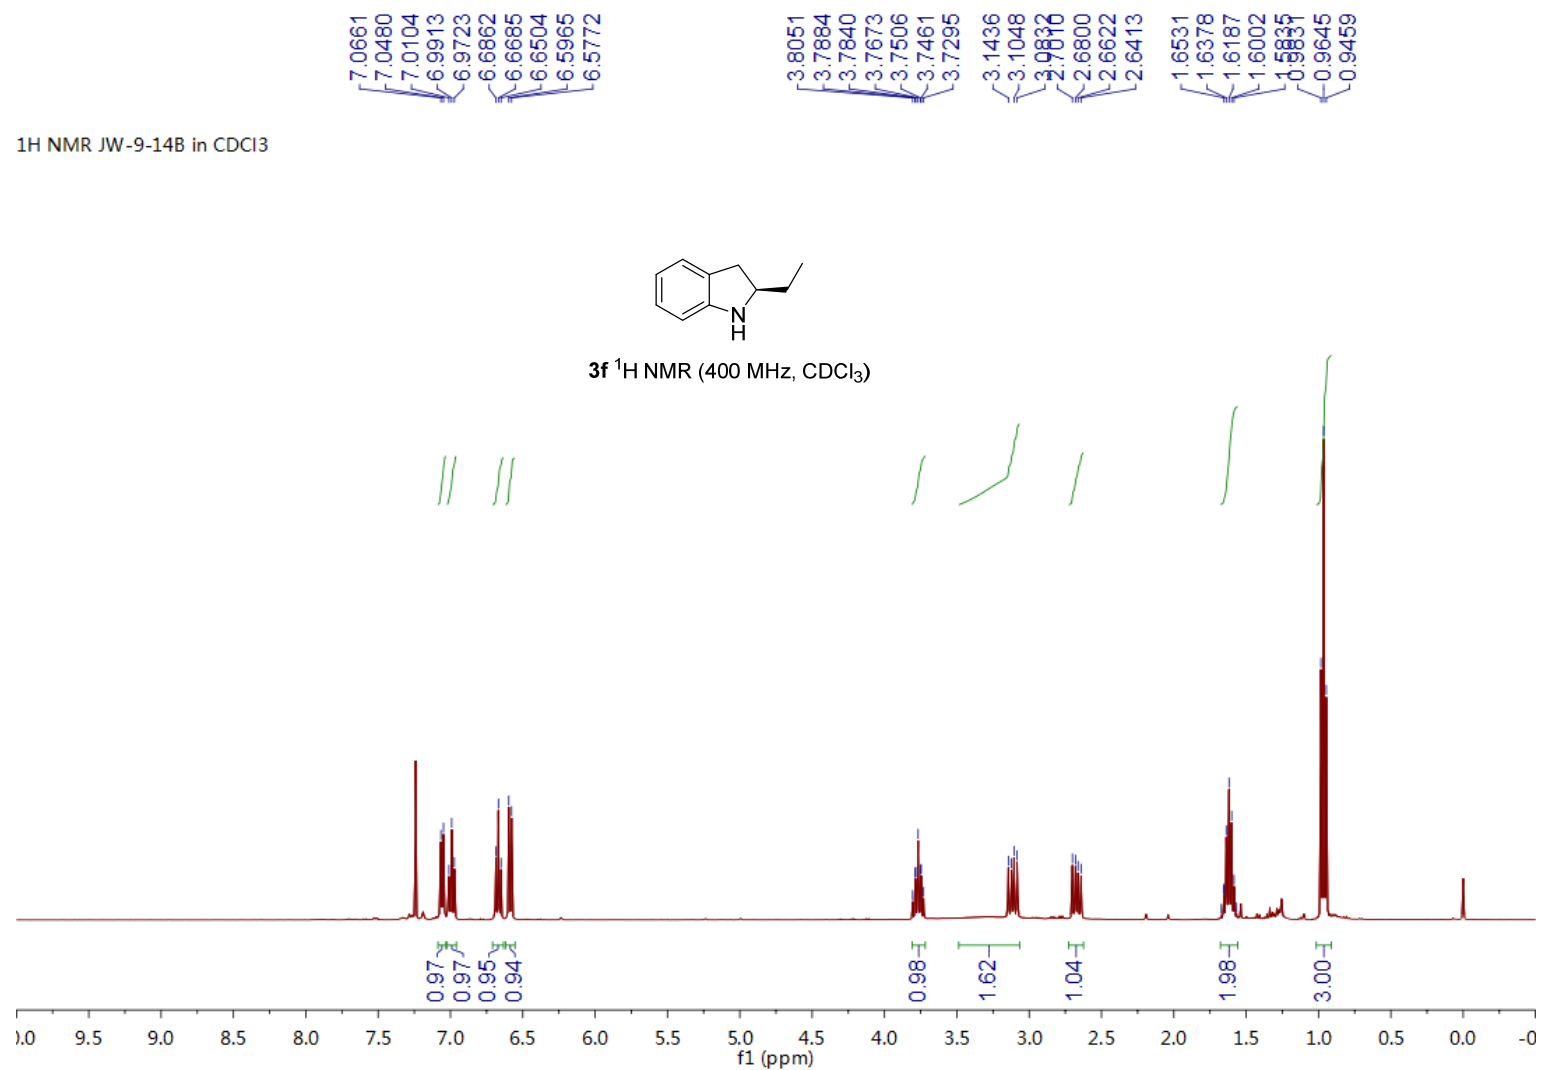

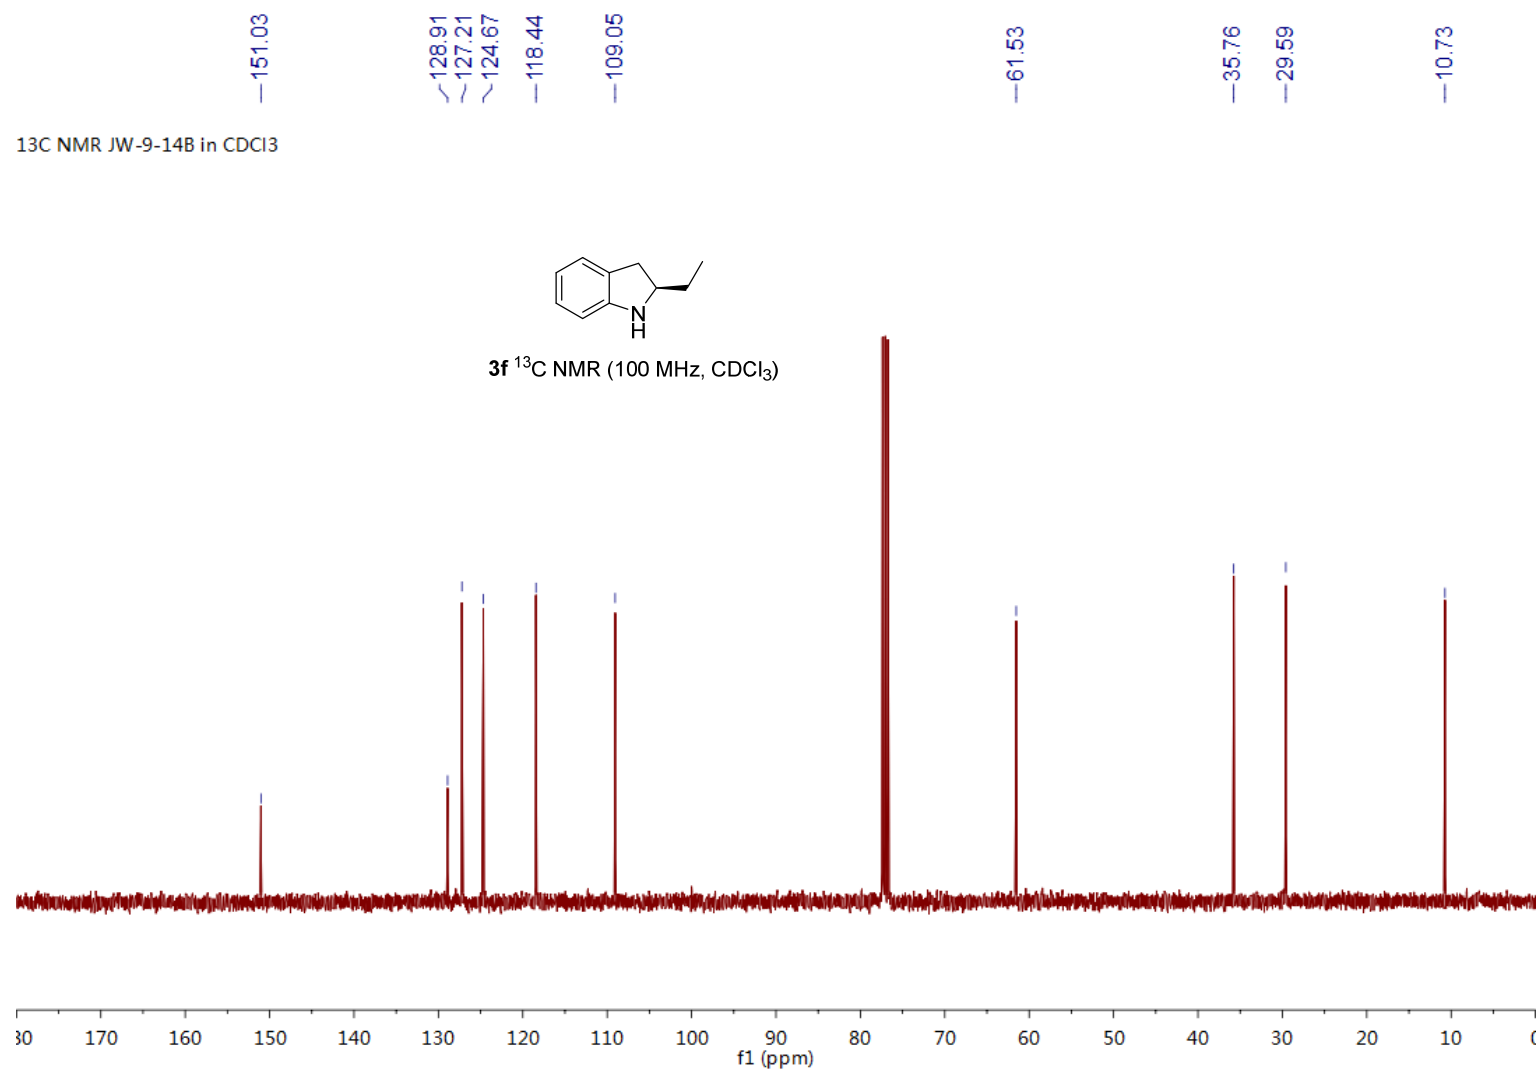

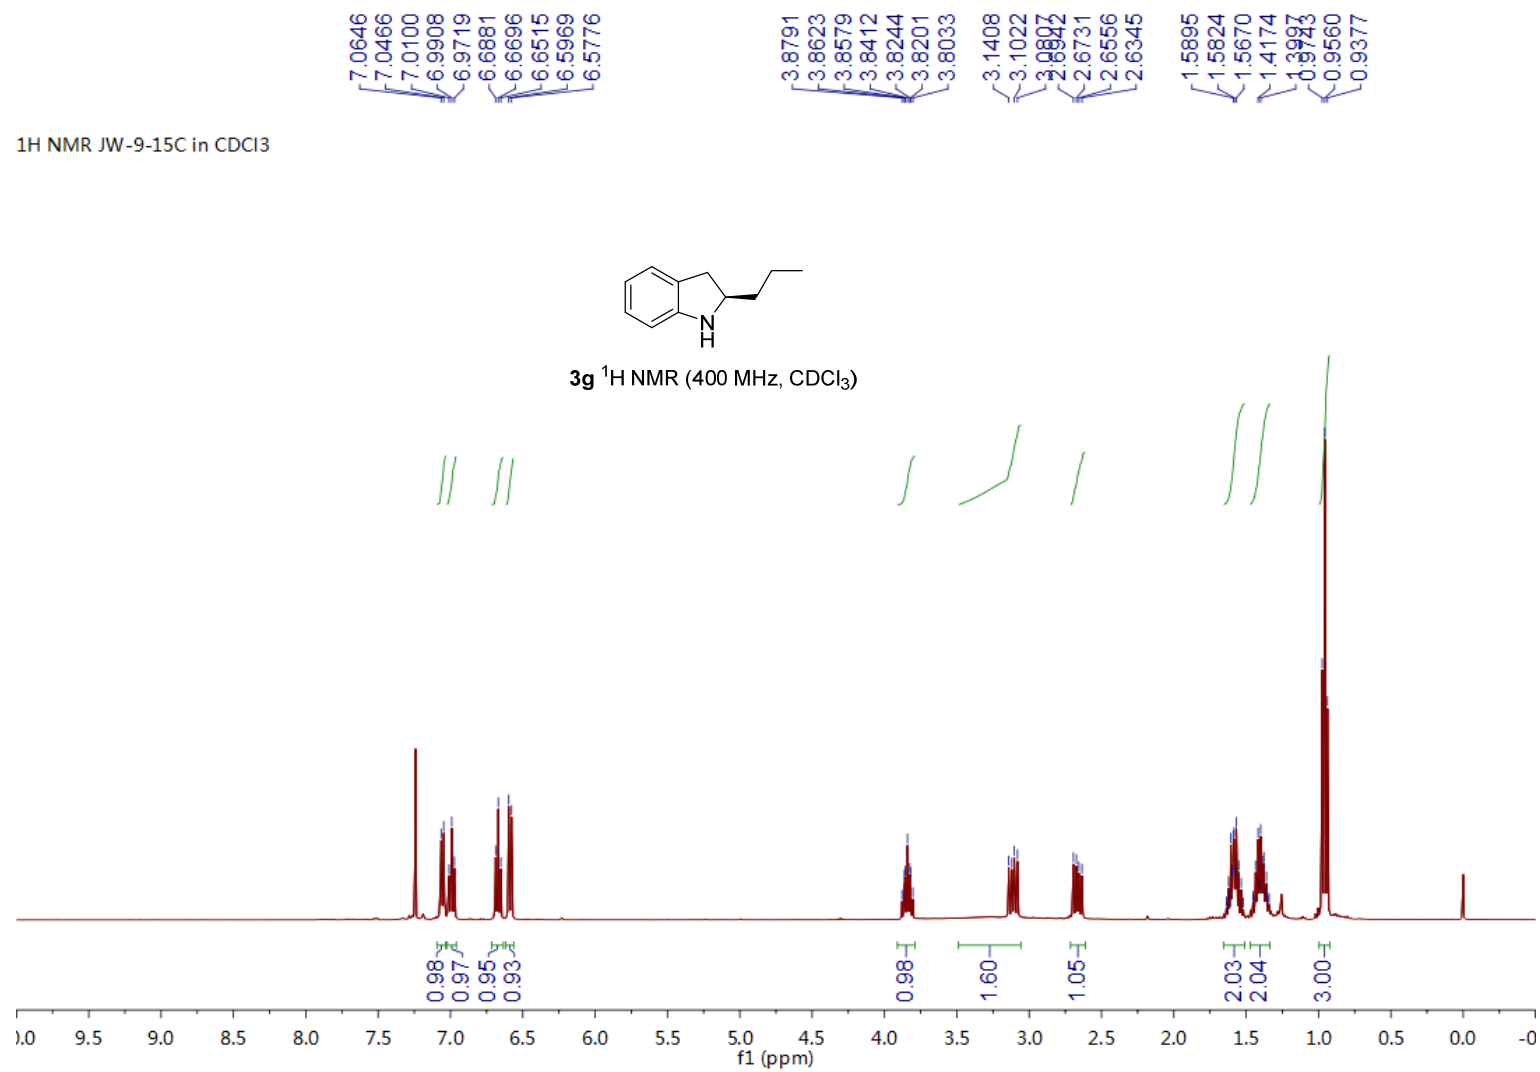

150.99  
13C NMR JW-9-15C in CDCl<sub>3</sub>

128.94  
127.21  
124.66  
118.47  
109.11

59.84

39.05  
36.17

19.76  
14.15

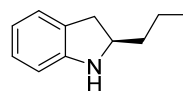

**3g** <sup>13</sup>C NMR (100 MHz, CDCl<sub>3</sub>)

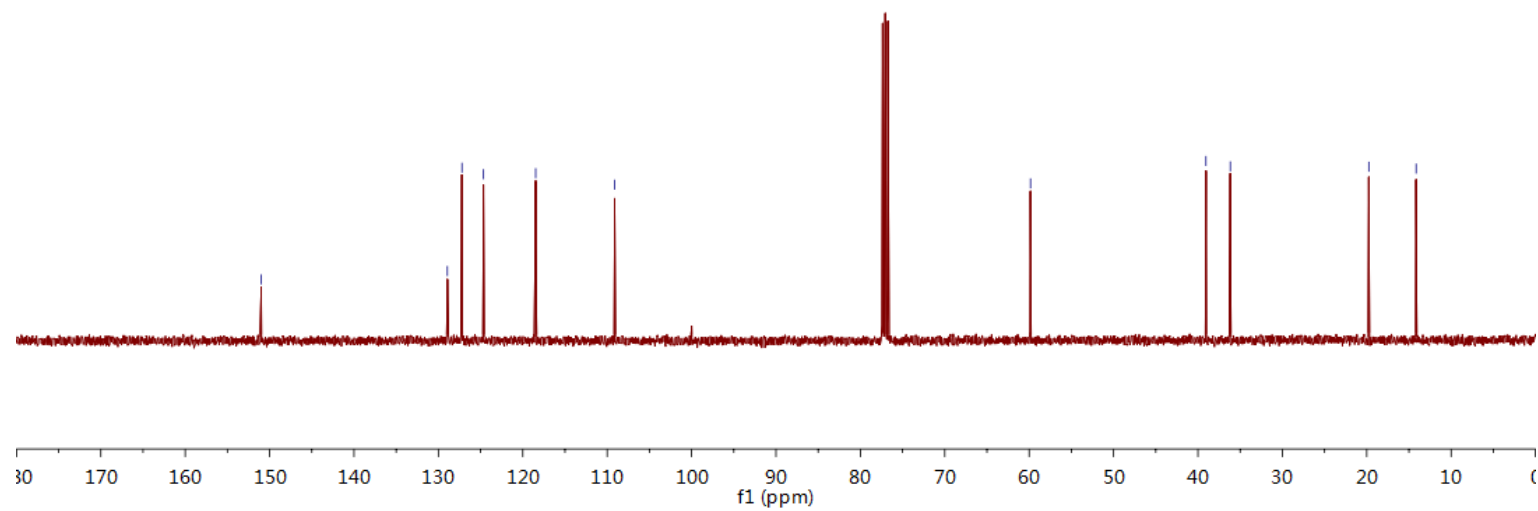

<sup>1</sup>H NMR CY-27-13 in CDCl<sub>3</sub>

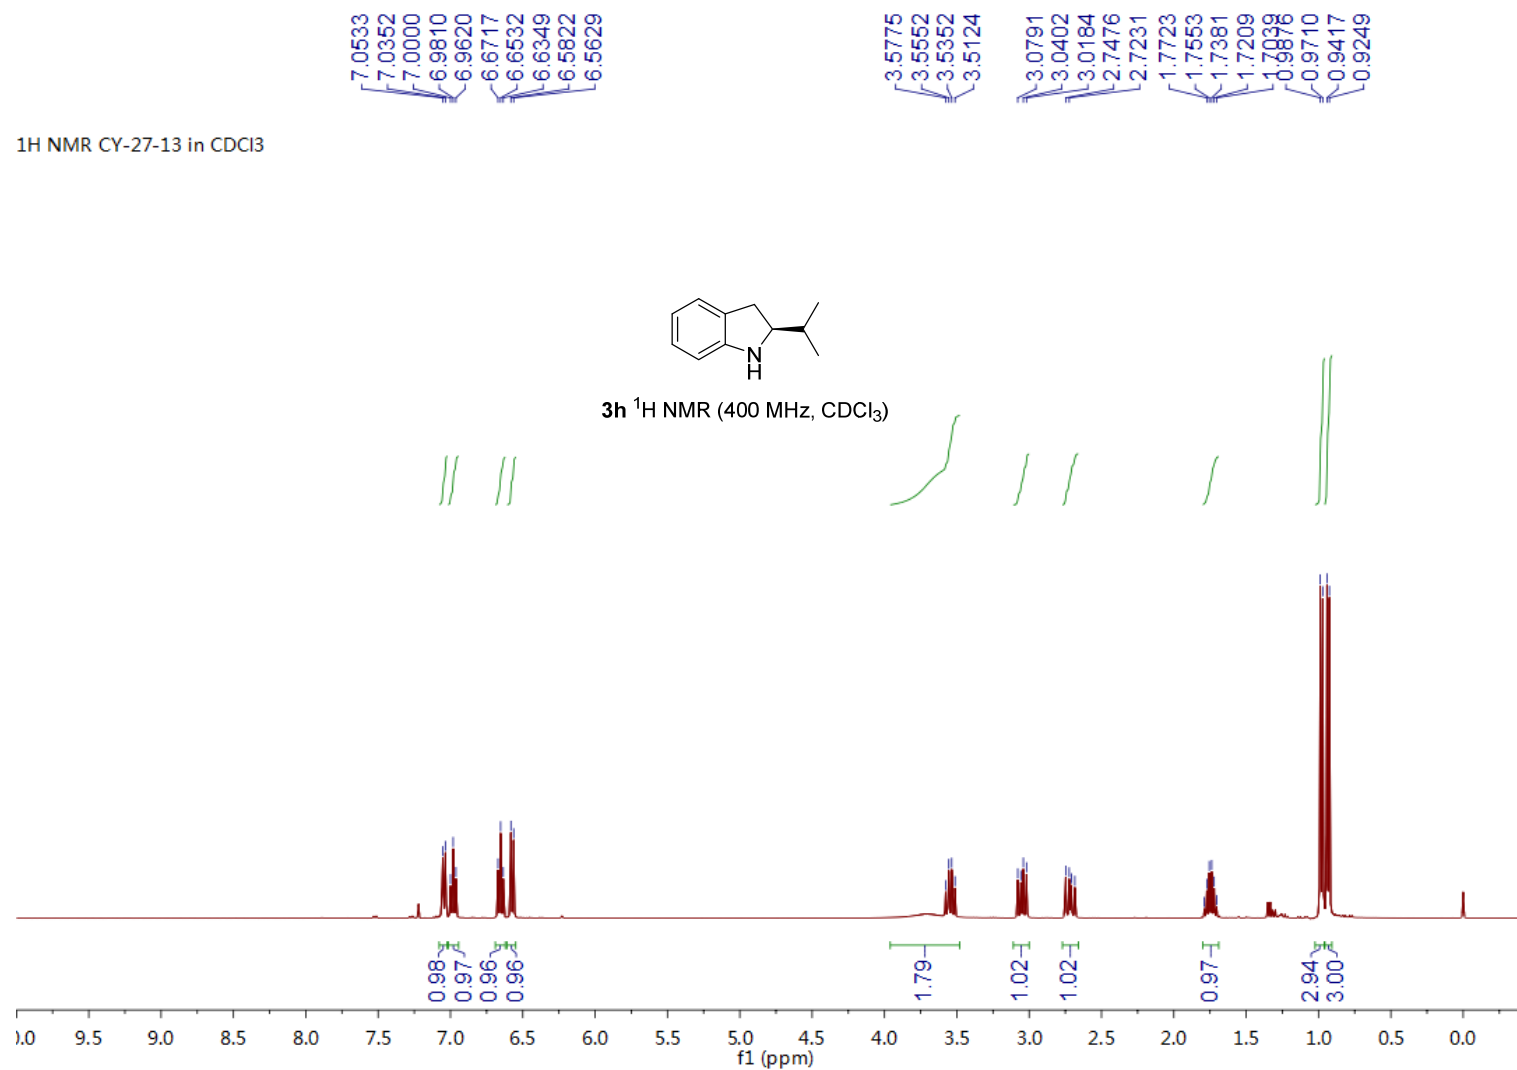

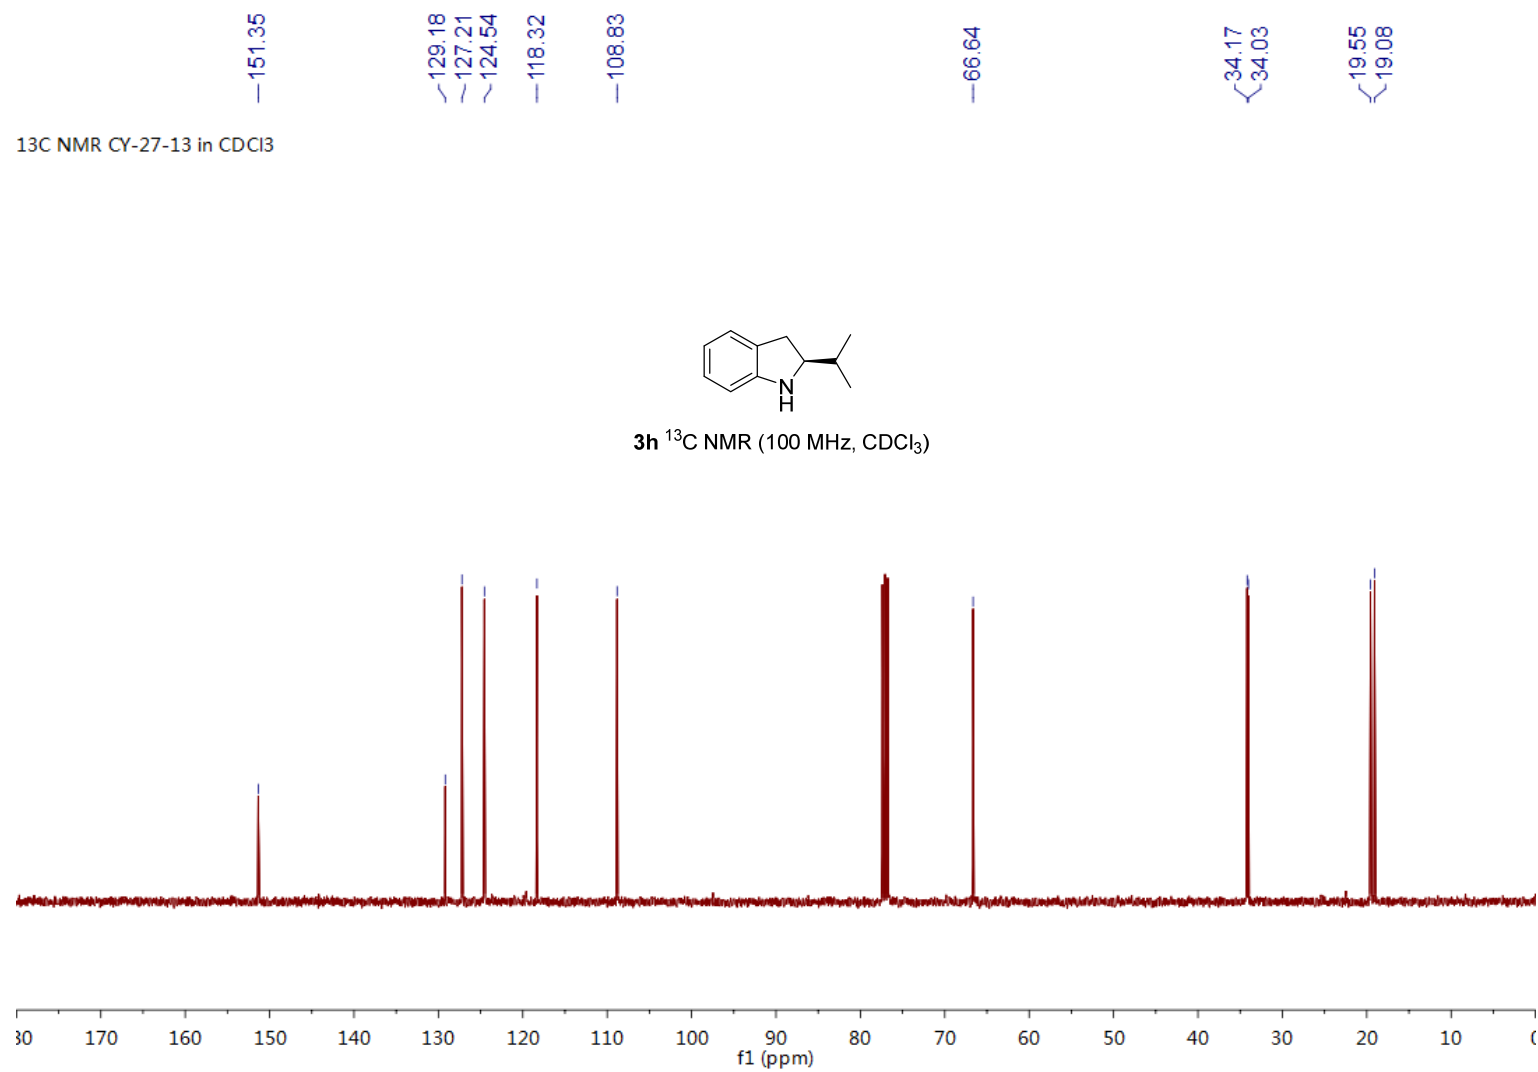



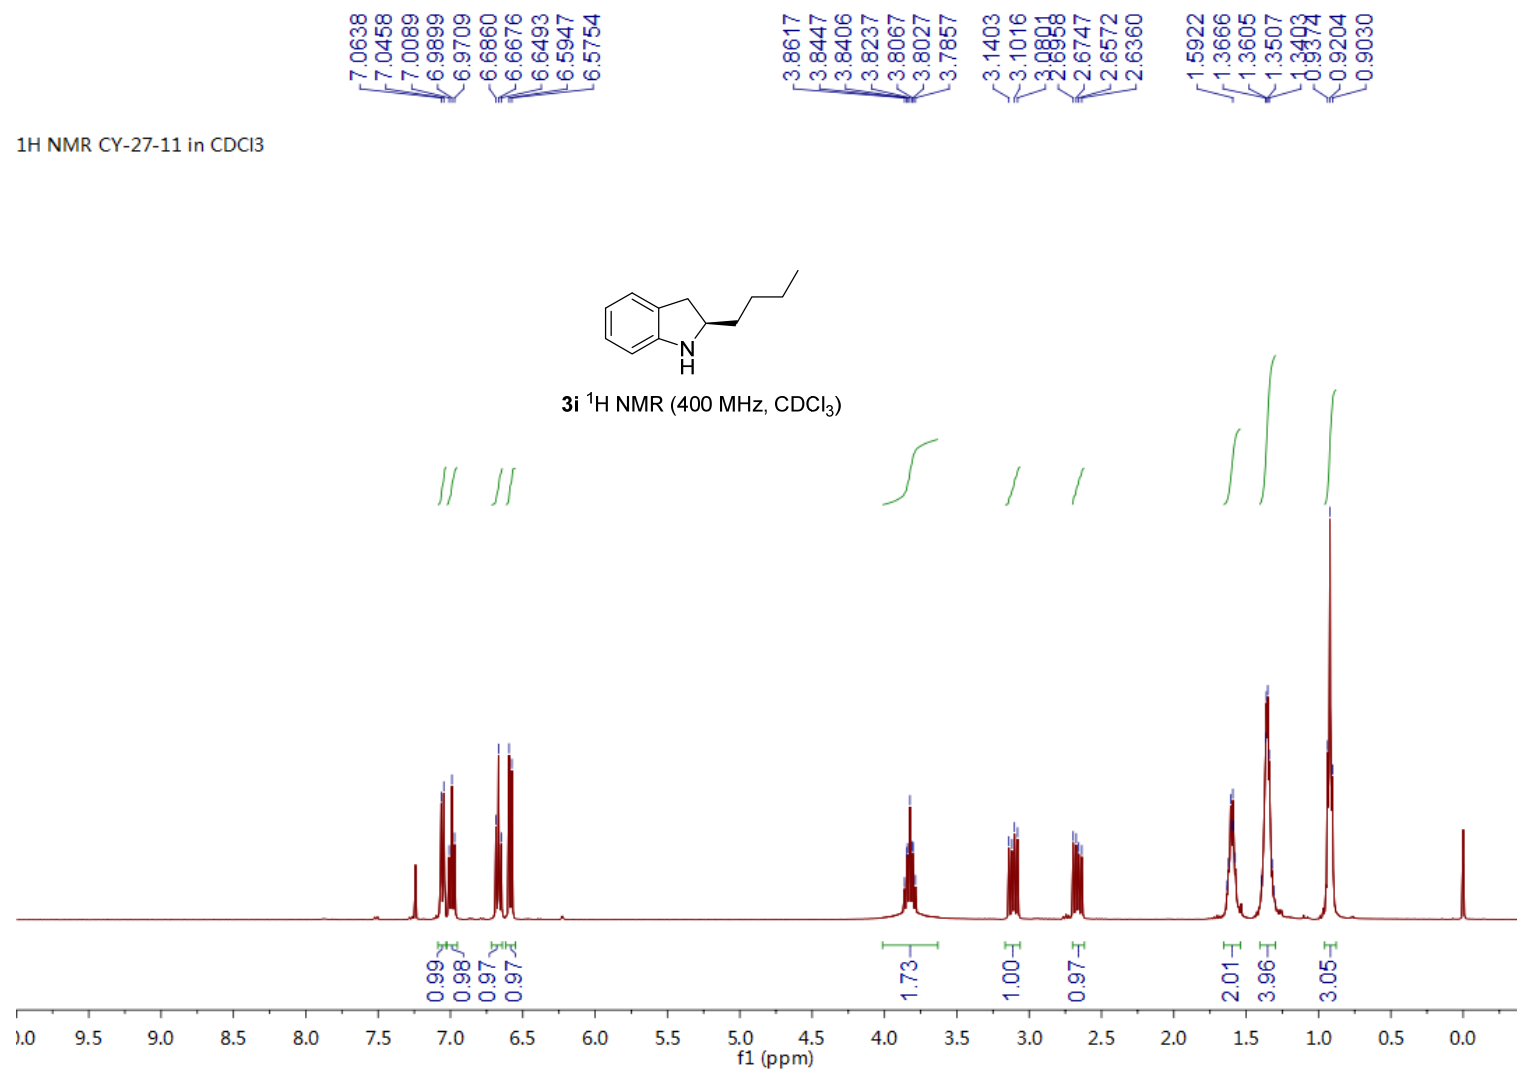

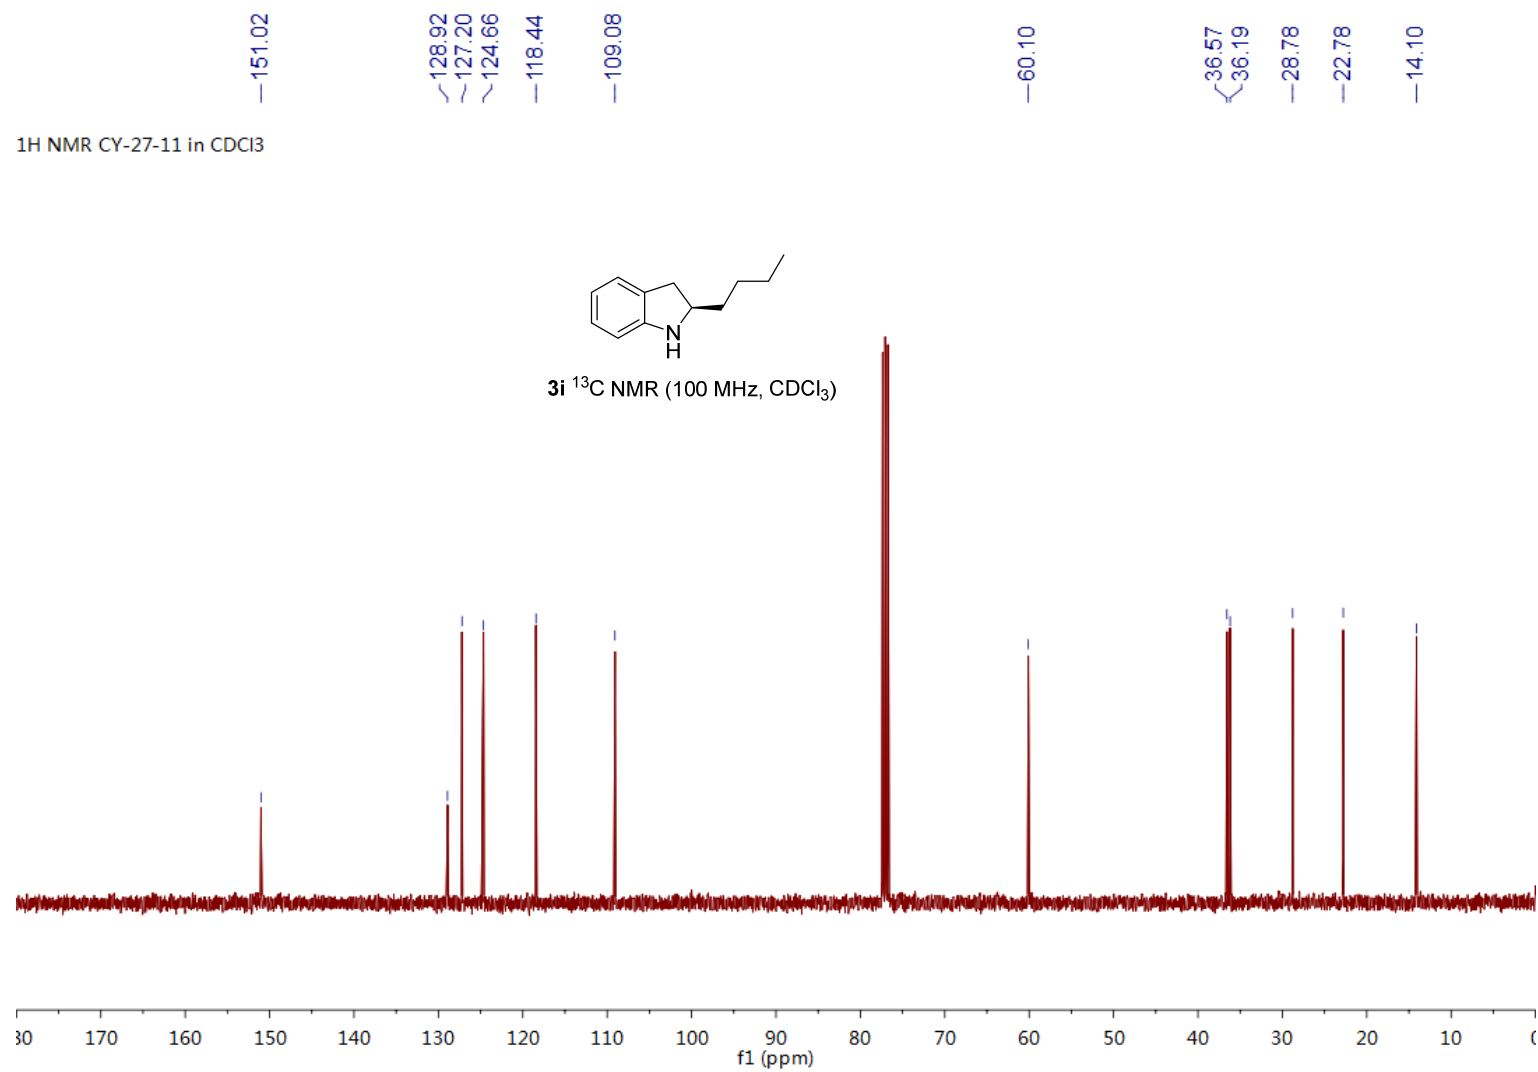

<sup>1</sup>H NMR CY-27-8 in CDCl<sub>3</sub>

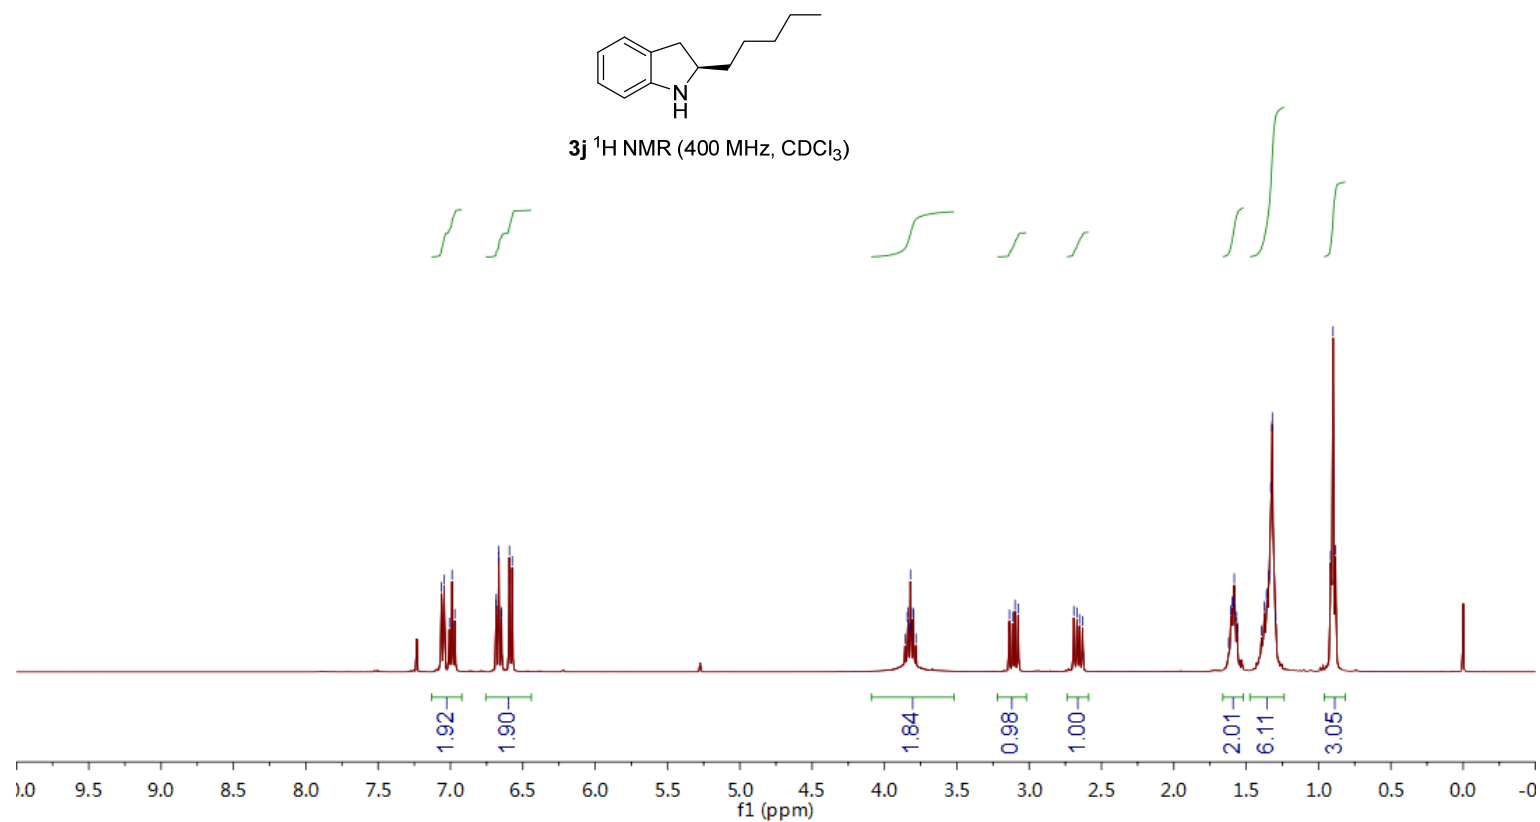

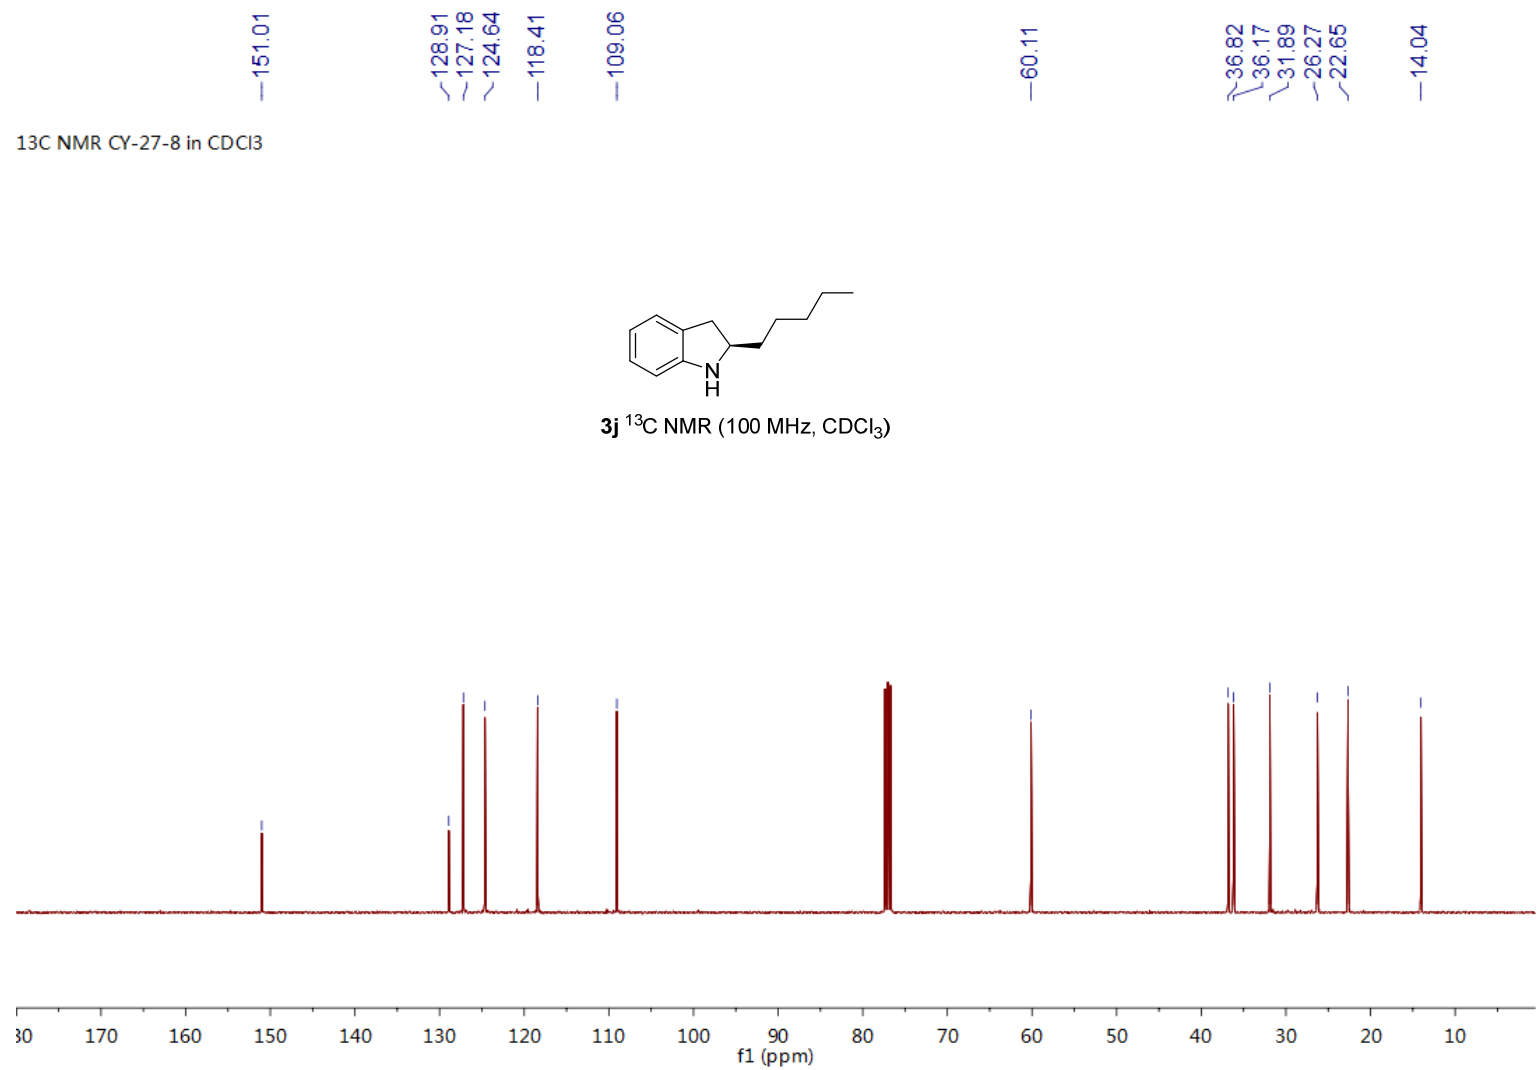

<sup>1</sup>H NMR CY-27-28A in CDCl<sub>3</sub>

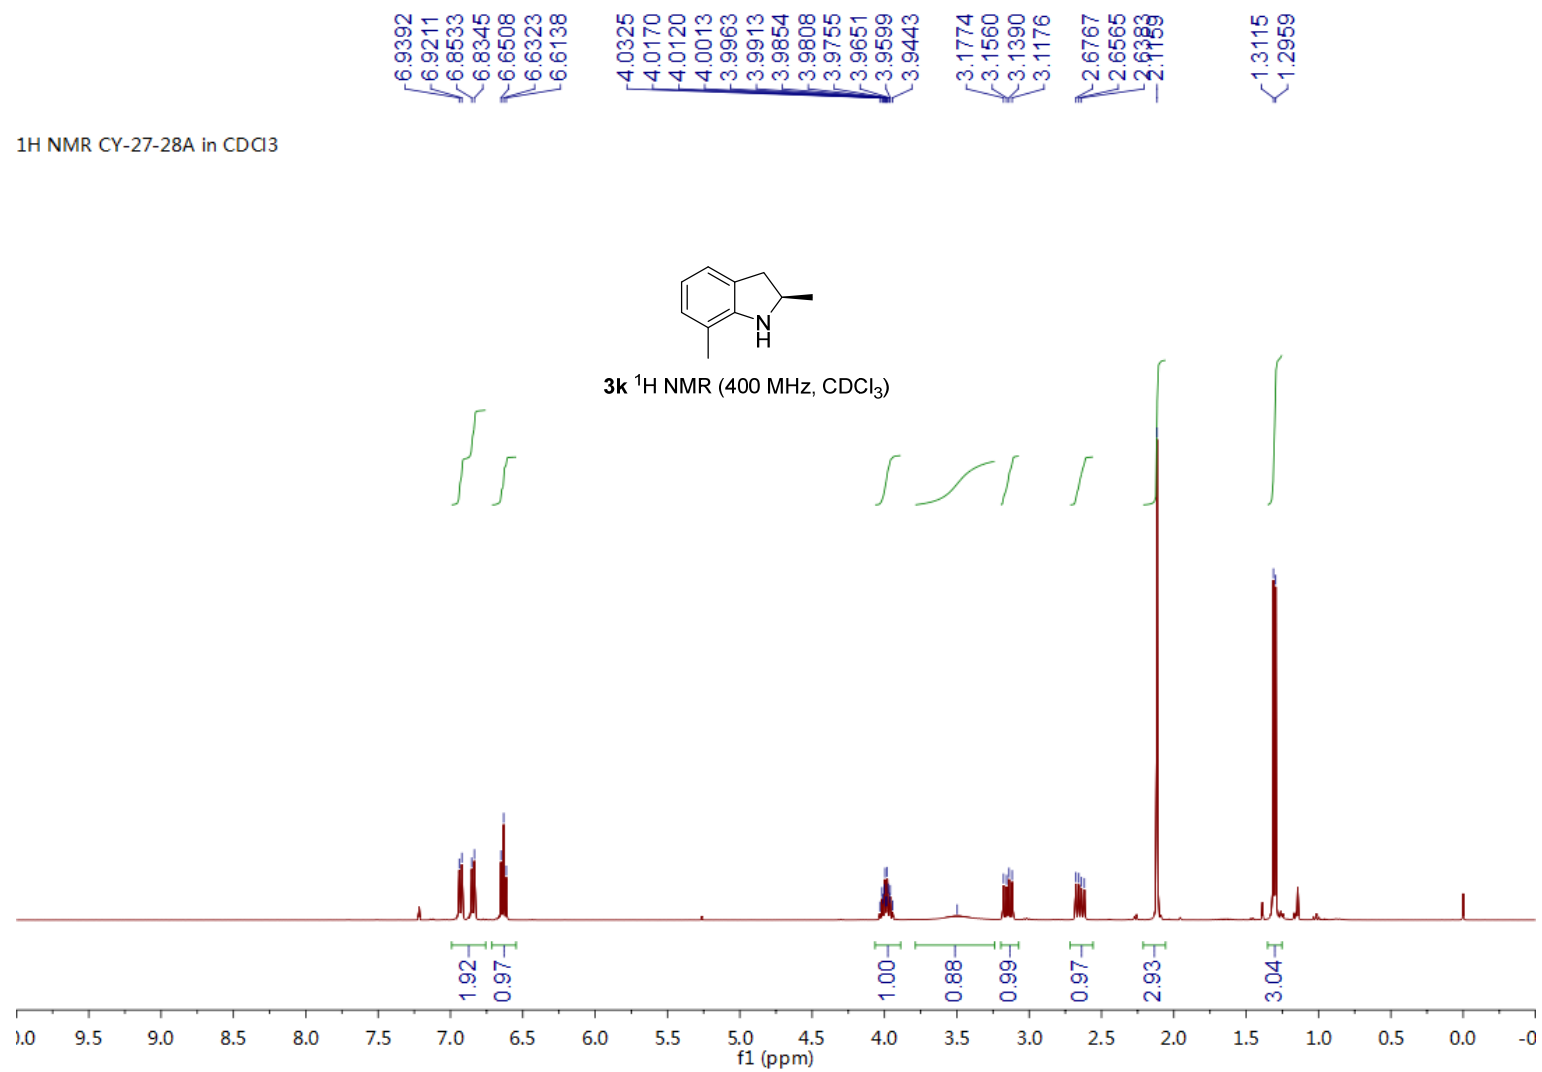

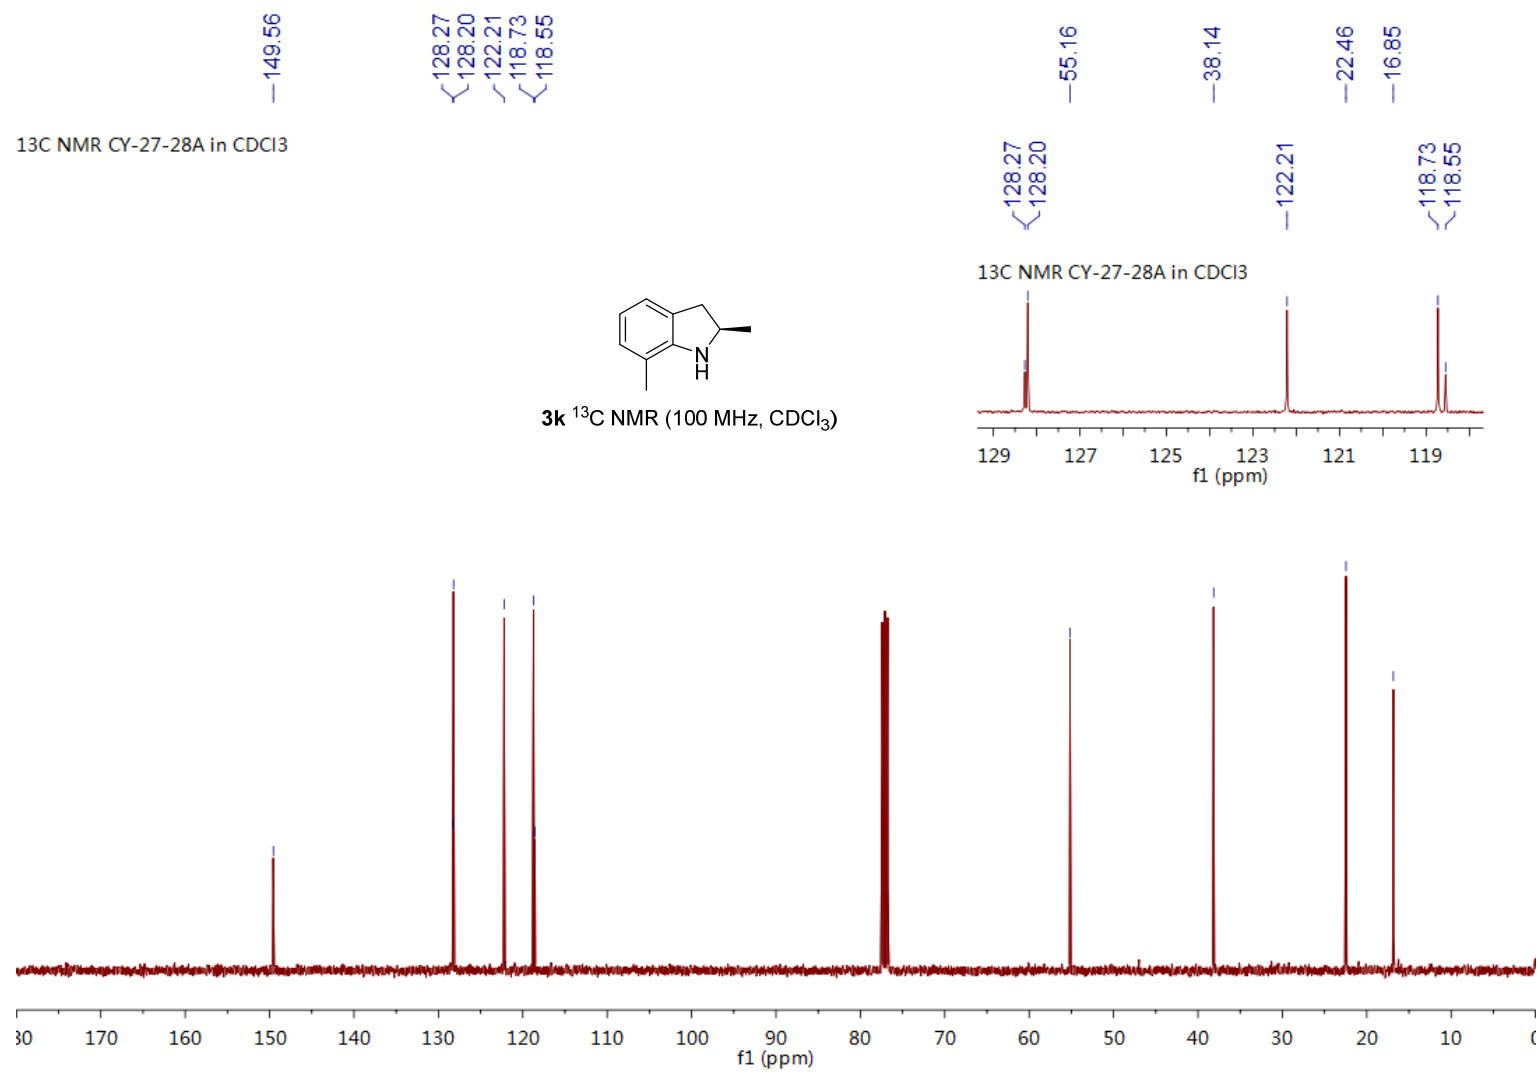

<sup>1</sup>H NMR JW-9-10A in CDCl<sub>3</sub>

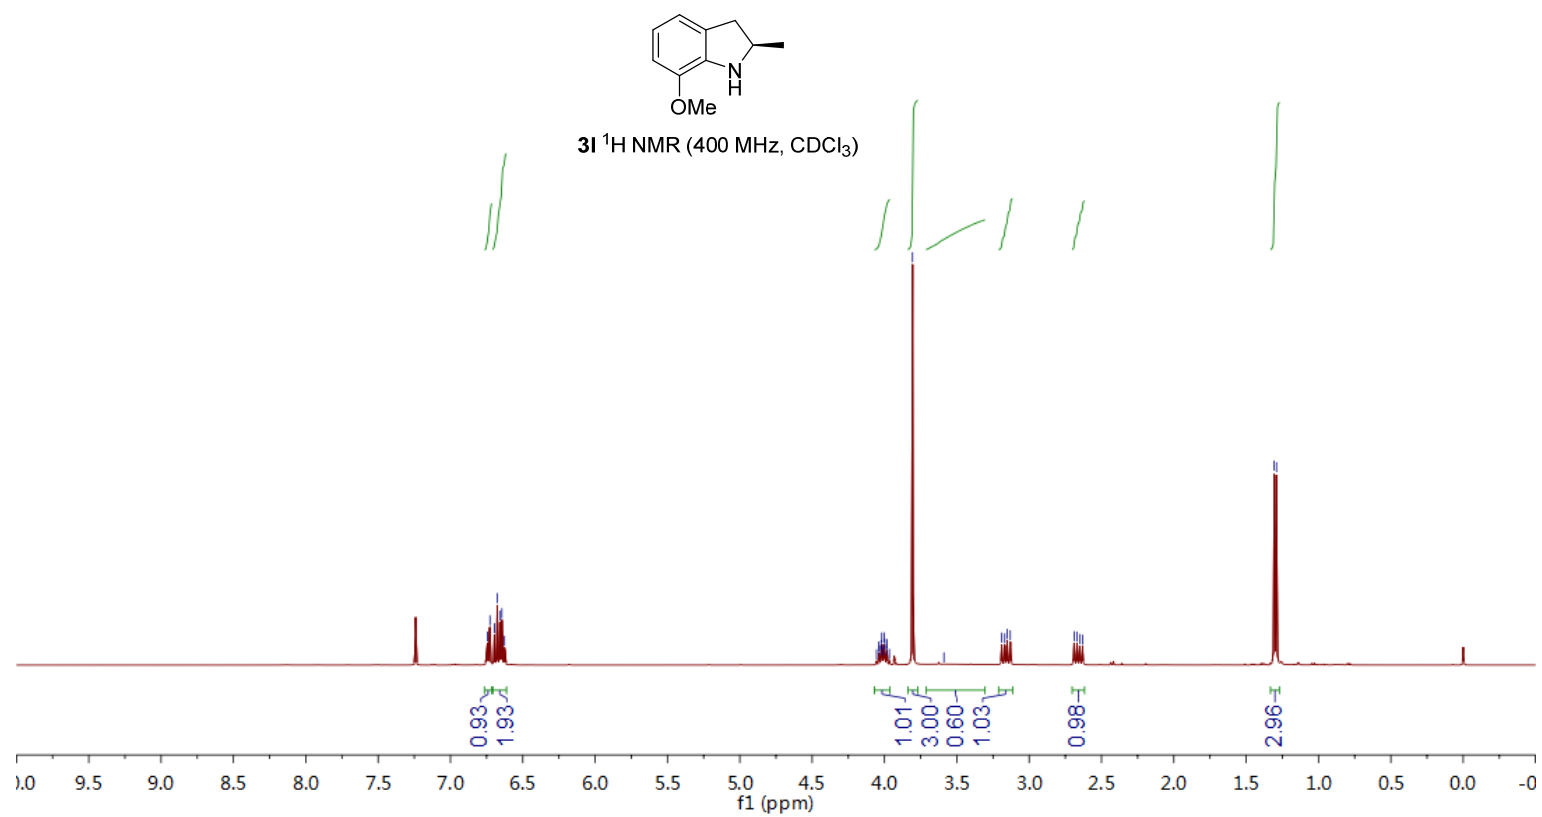

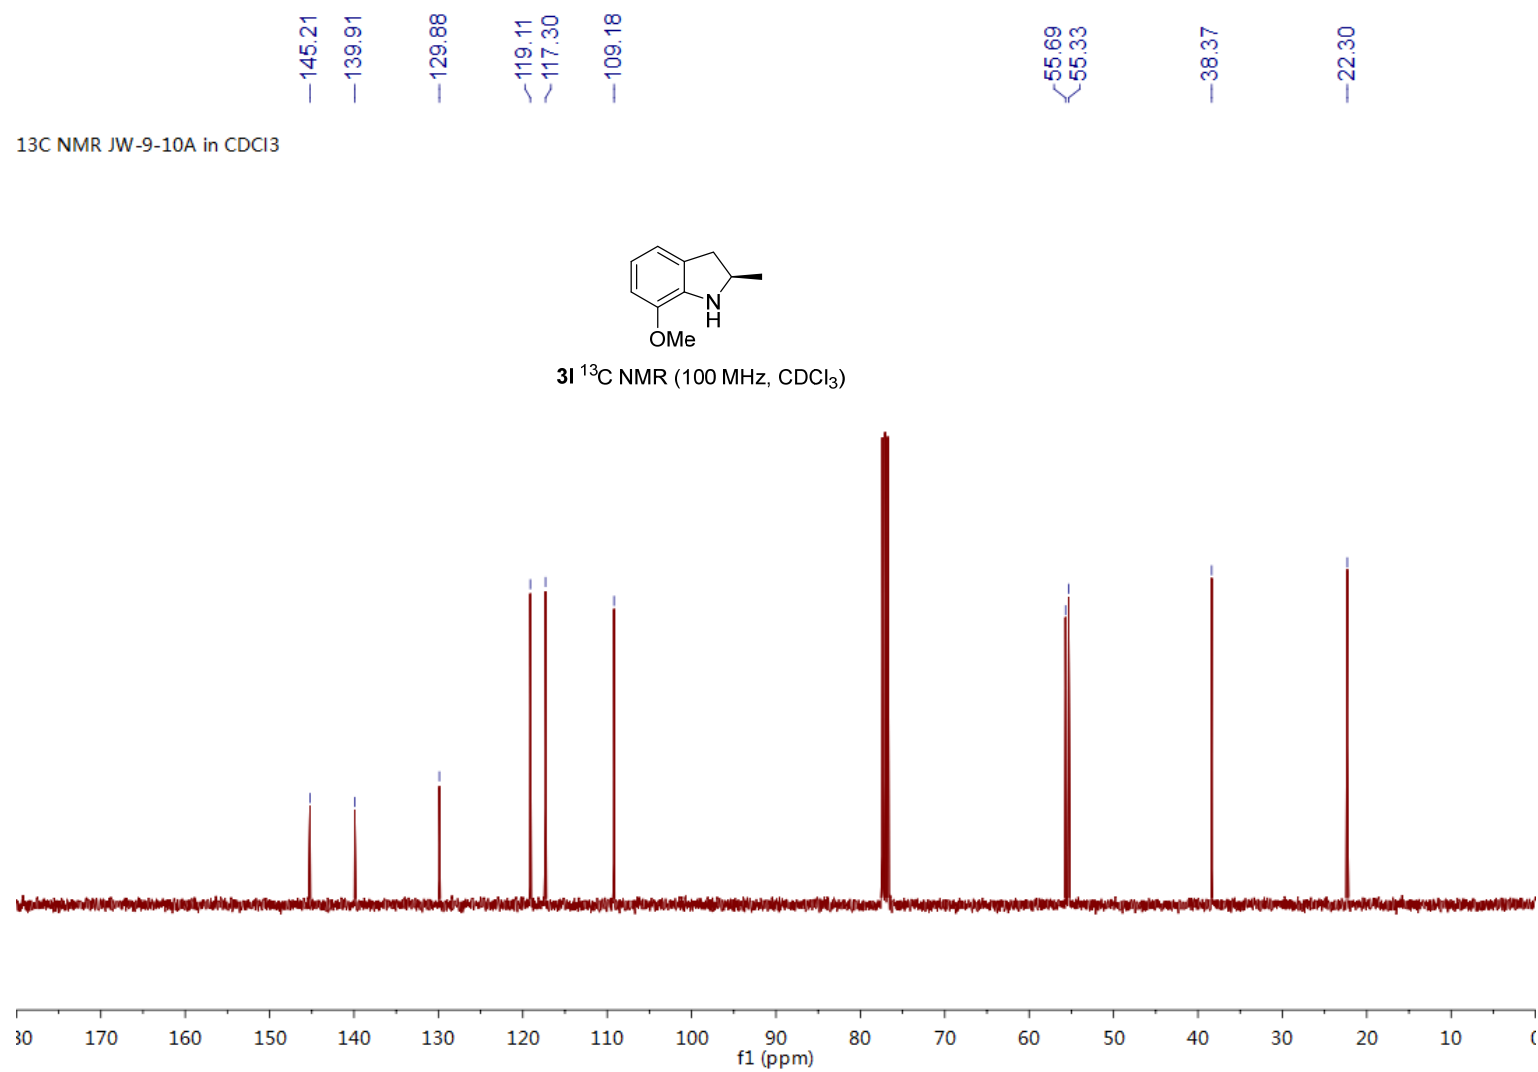



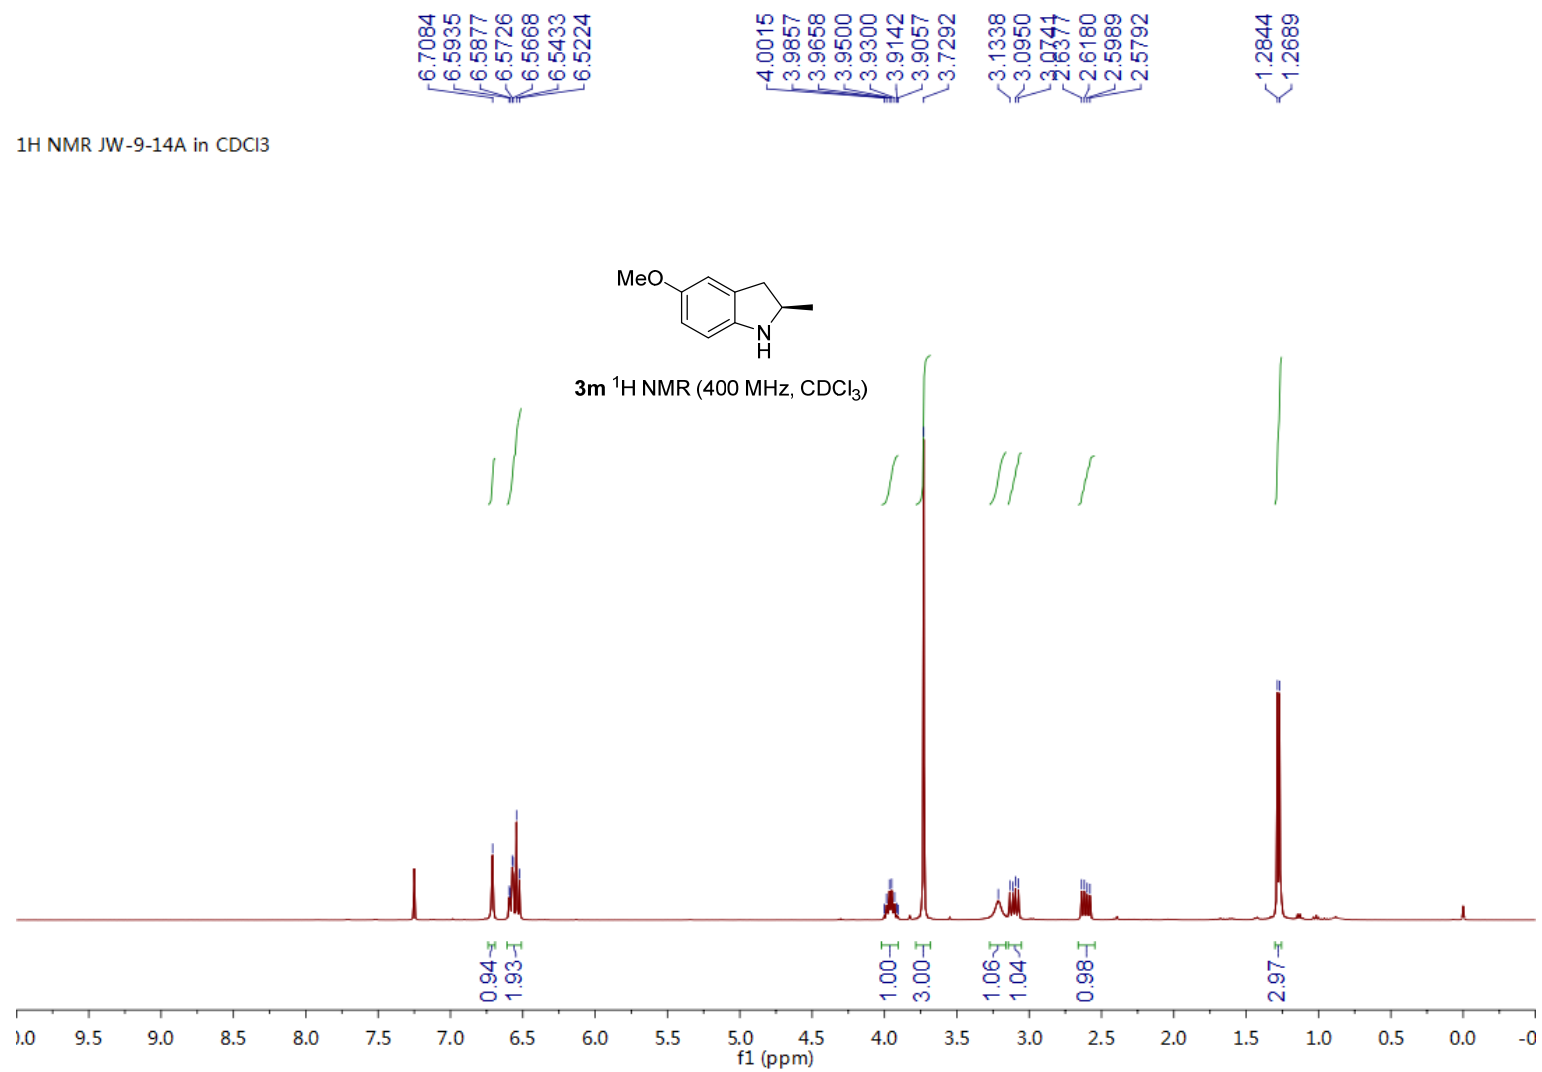

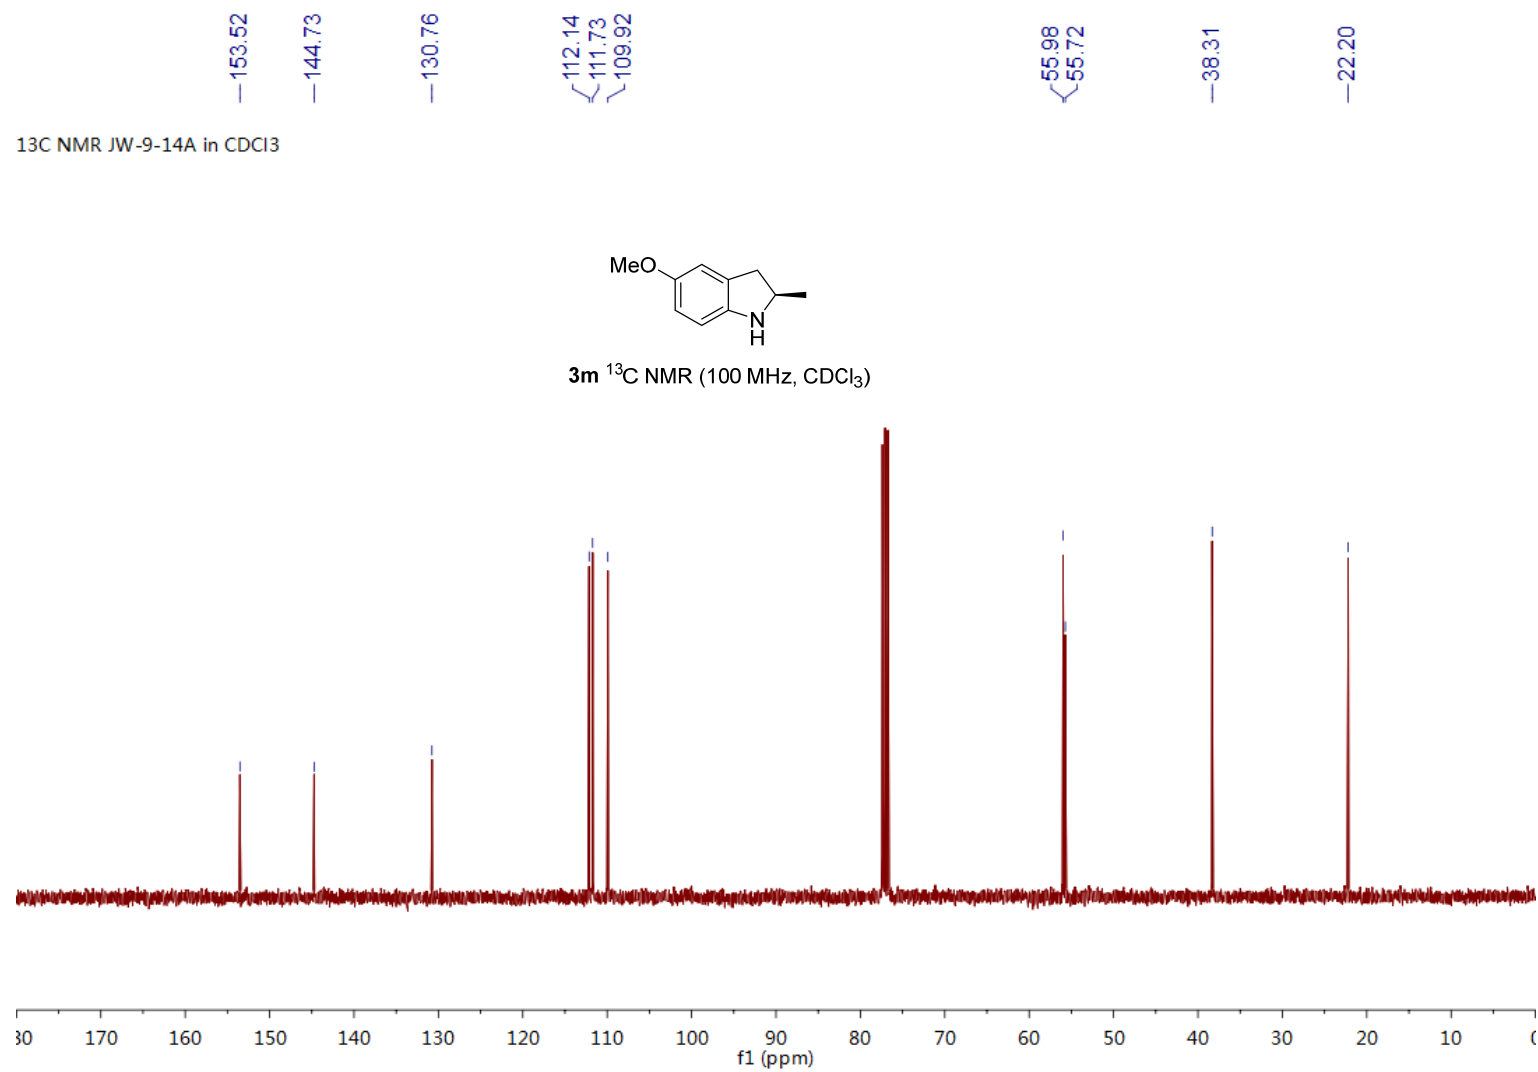

<sup>1</sup>H NMR CY-27-28B in CDCl<sub>3</sub>

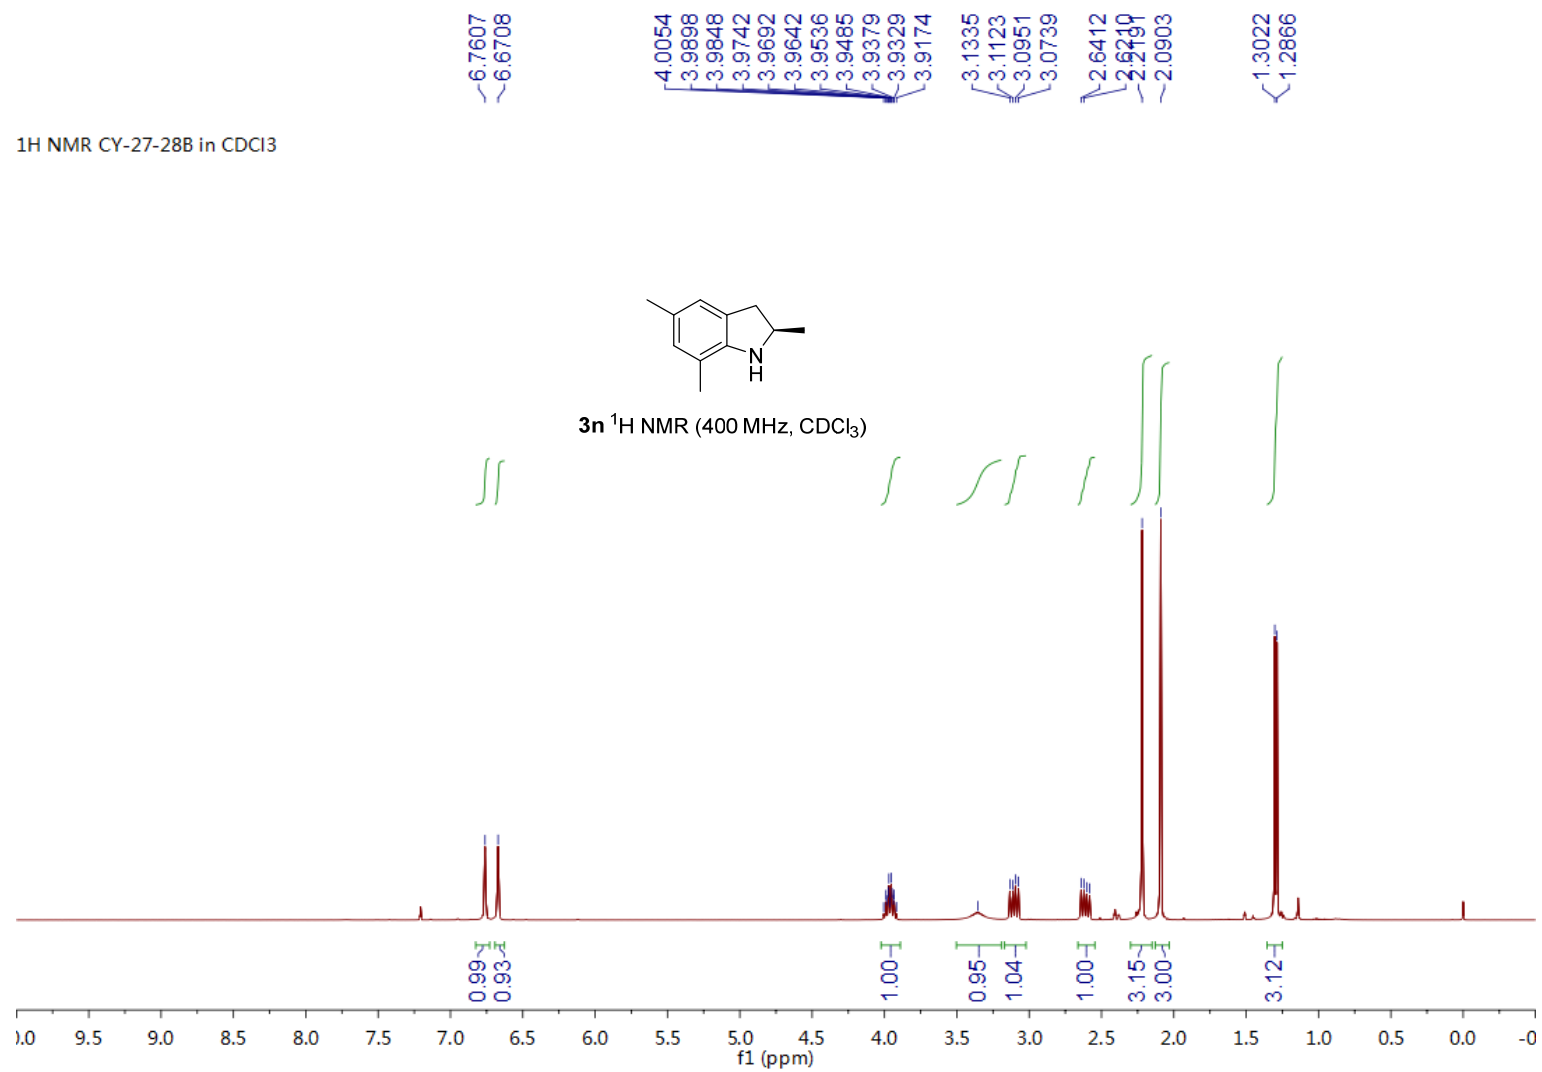

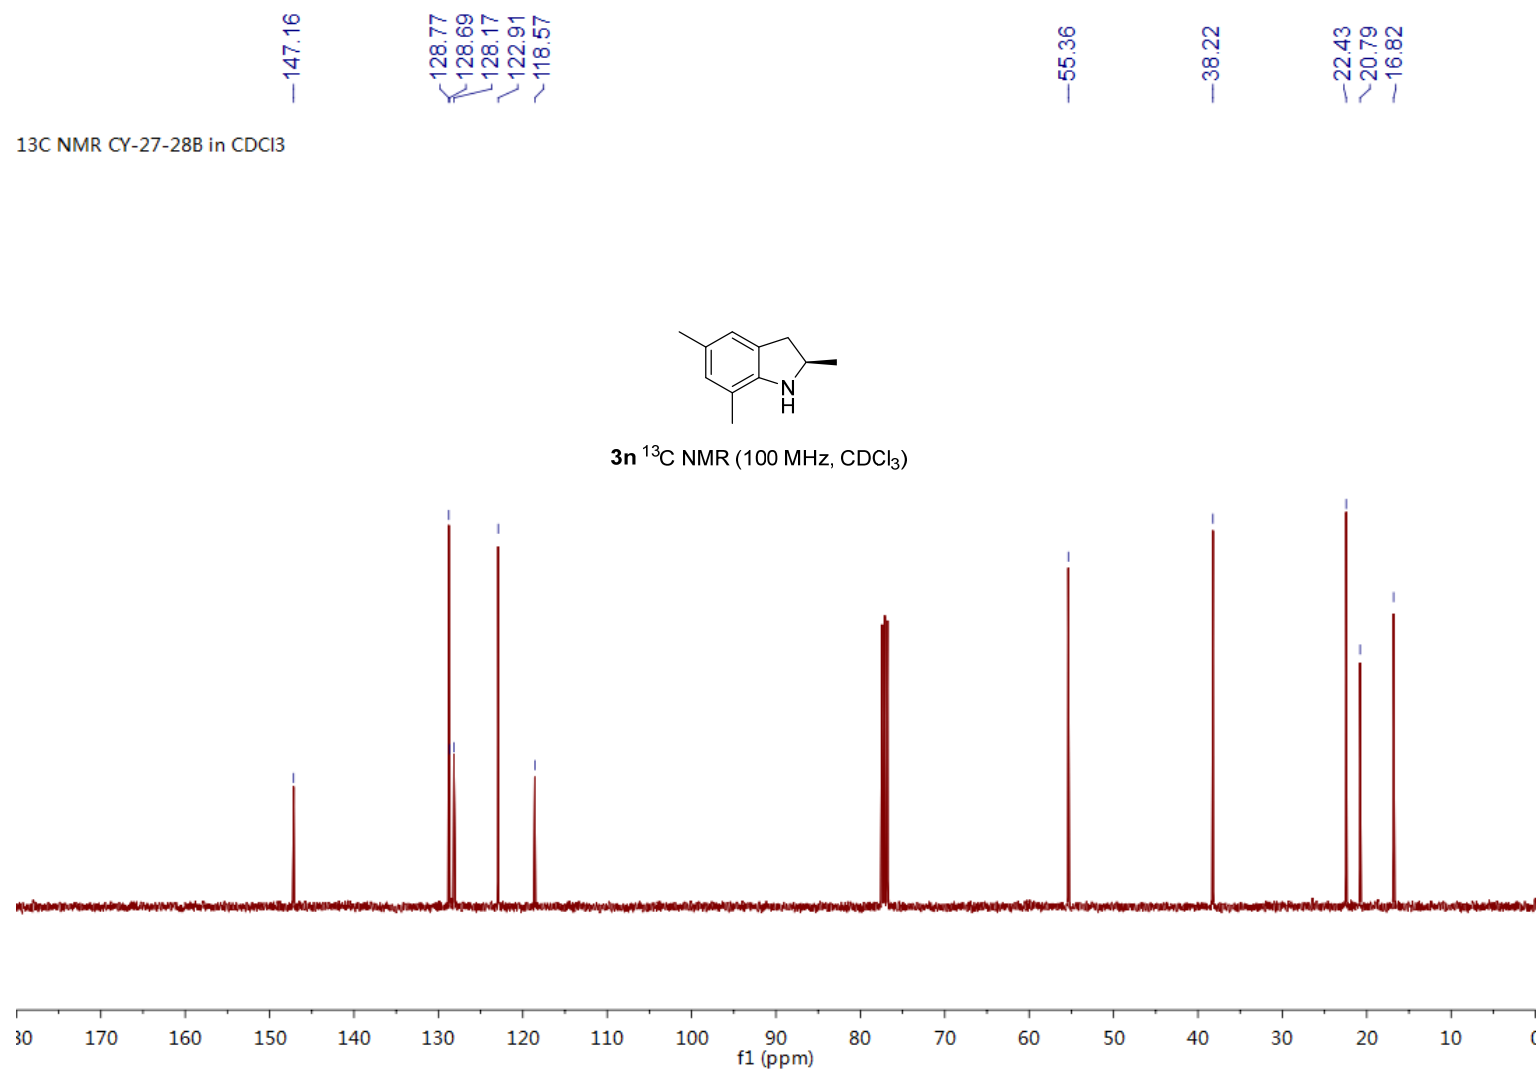

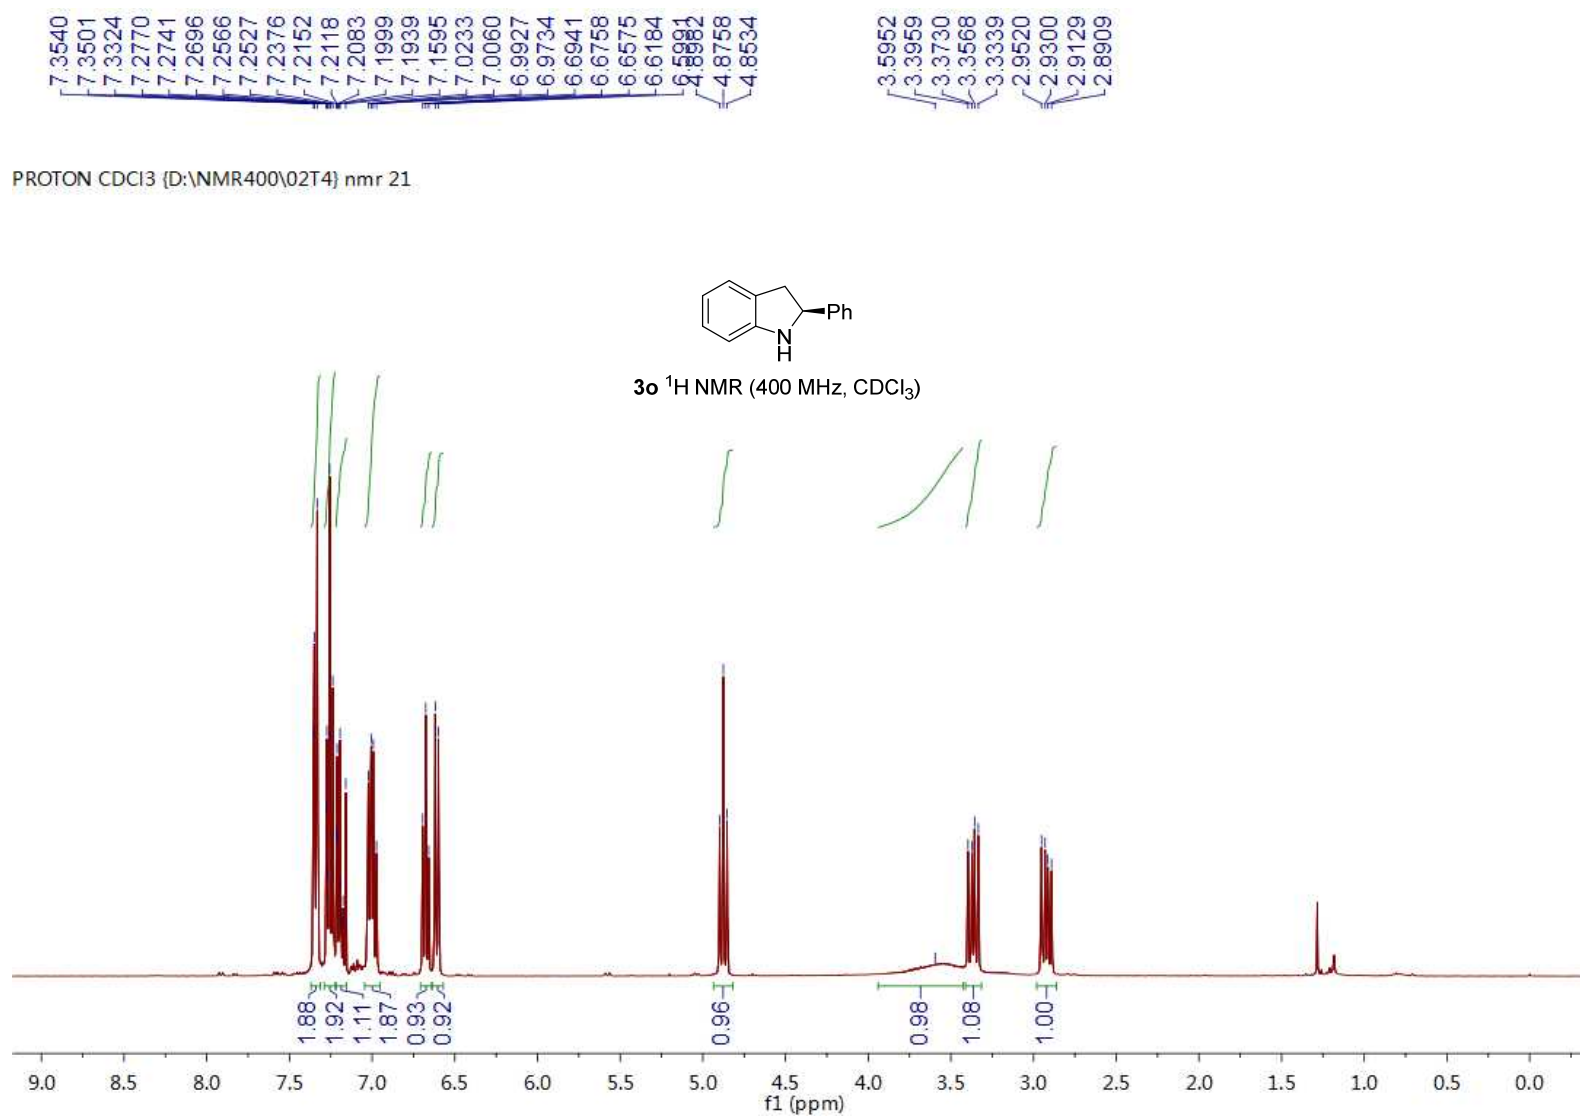

—150.61  
 —144.45  
 128.81  
 128.50  
 127.79  
 127.67  
 126.54  
 124.81  
 119.41  
 —109.46  
 —63.72  
 —39.67

C13CPD CDCl<sub>3</sub> {D:\NMR400\02T4} nmr 21

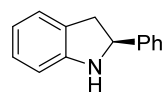

**3o** <sup>13</sup>C NMR (100 MHz, CDCl<sub>3</sub>)

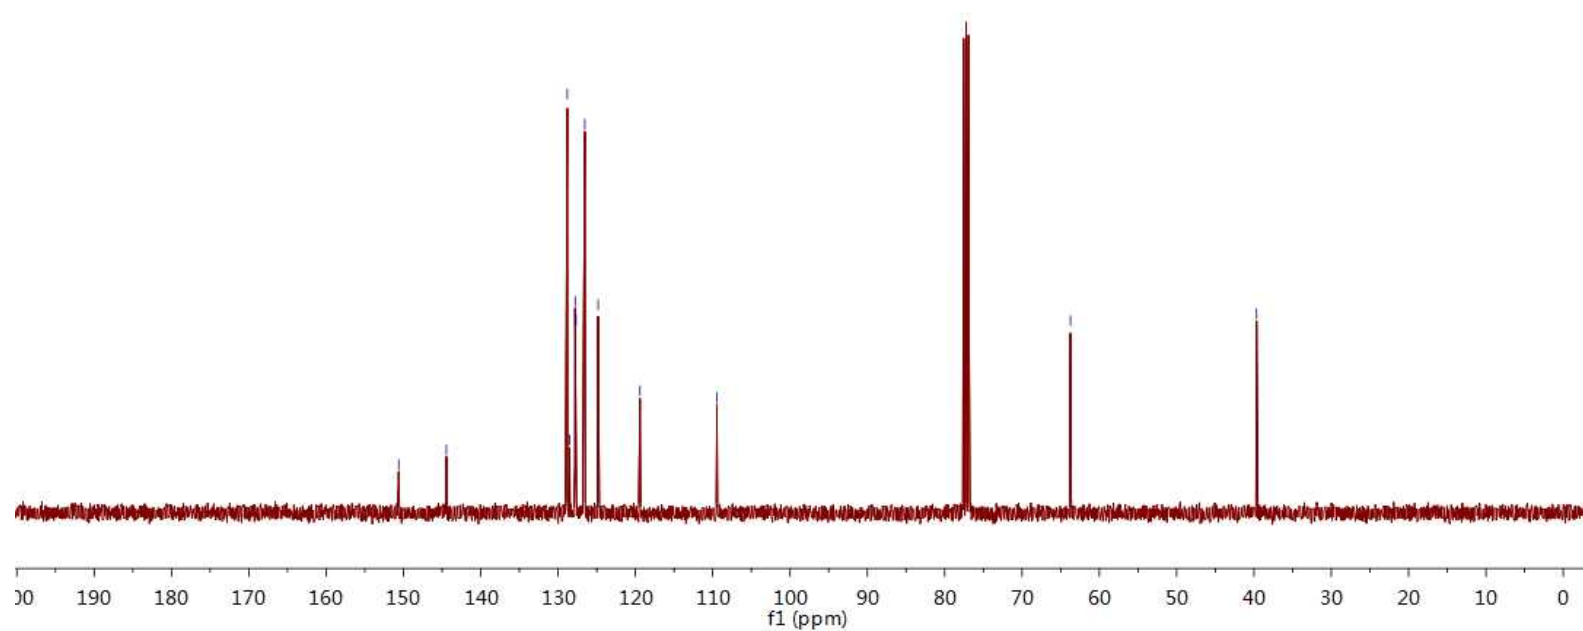

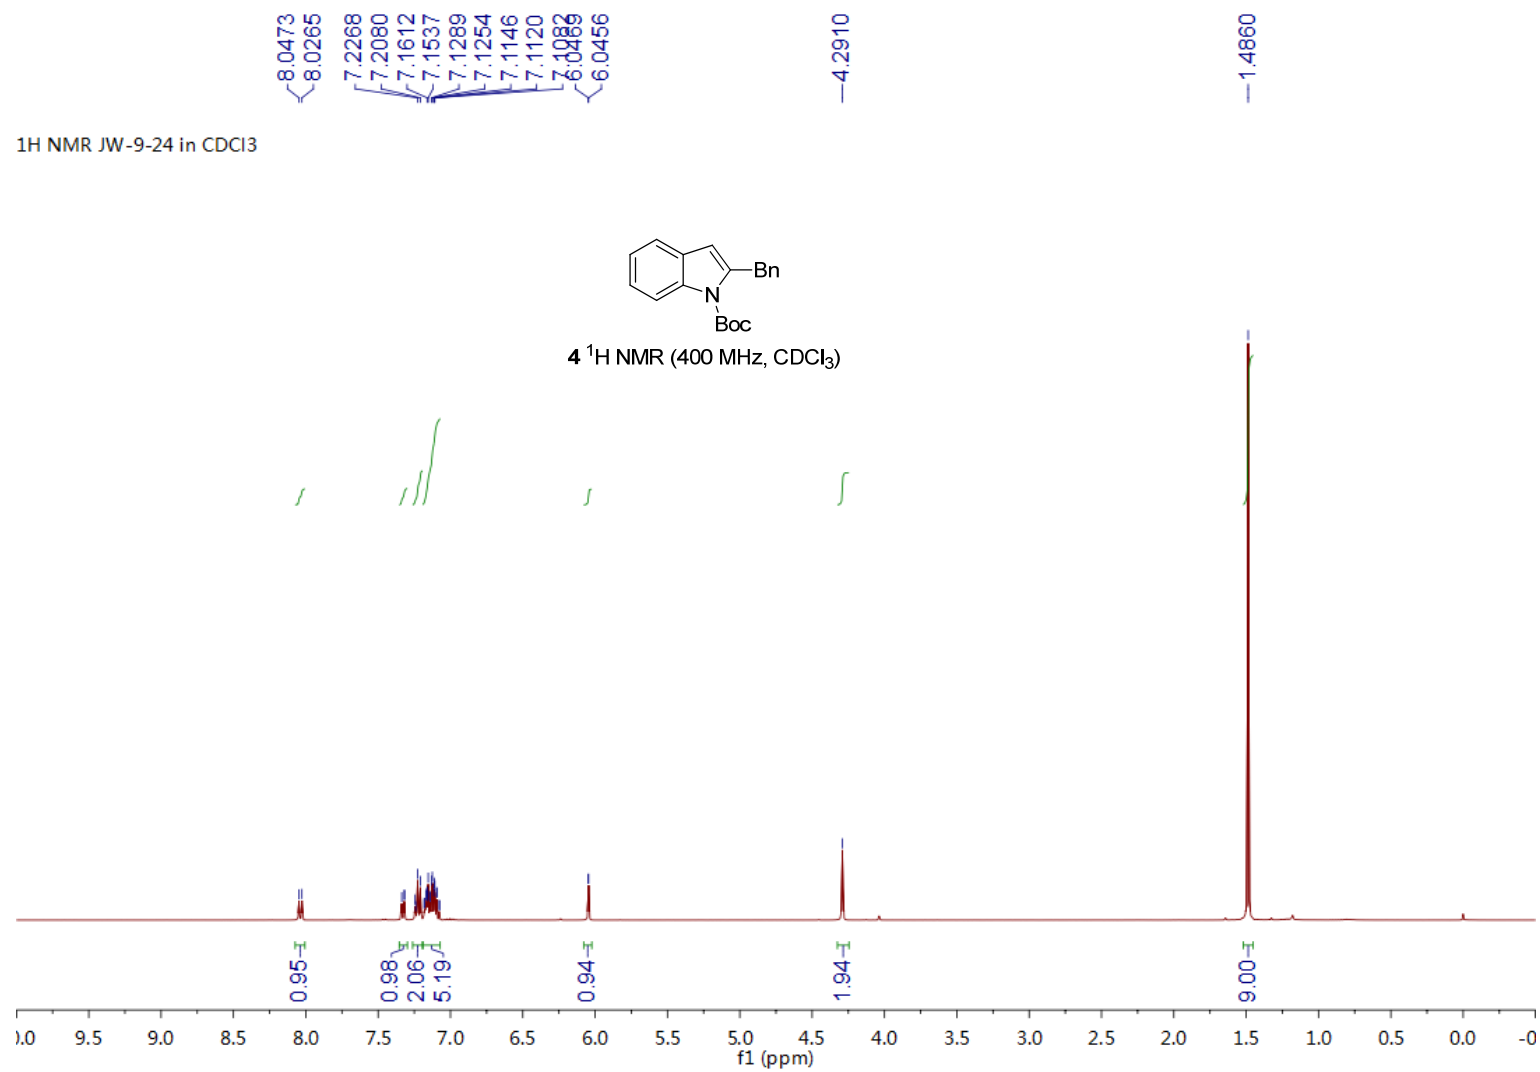

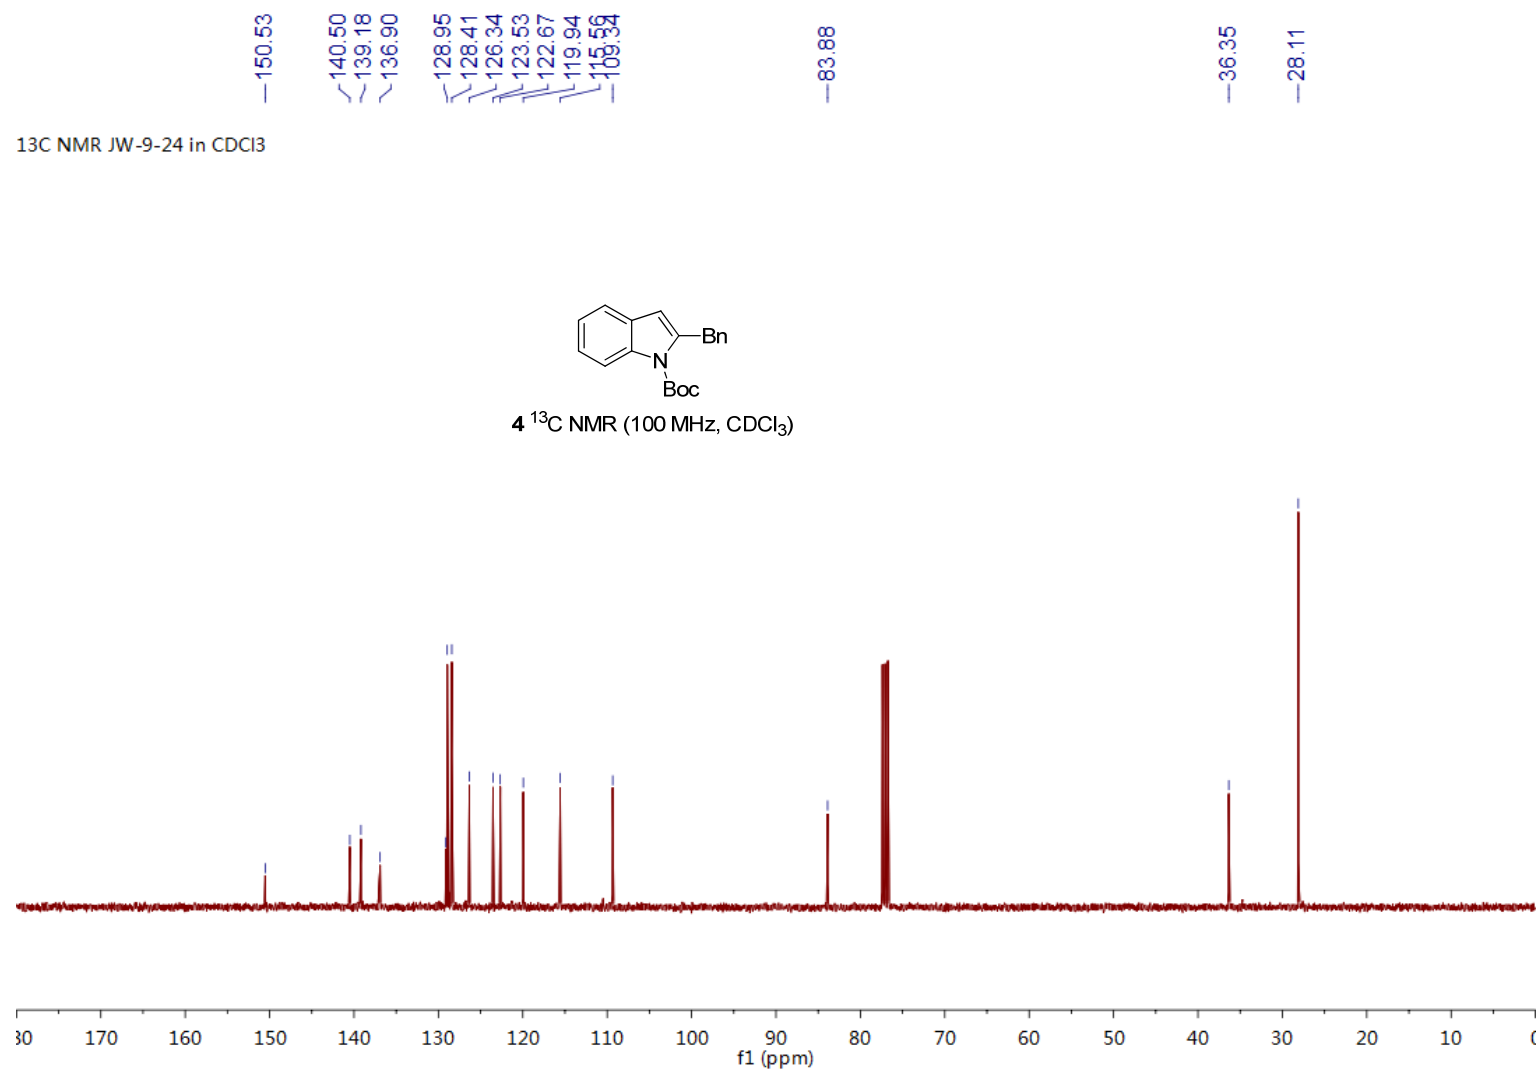



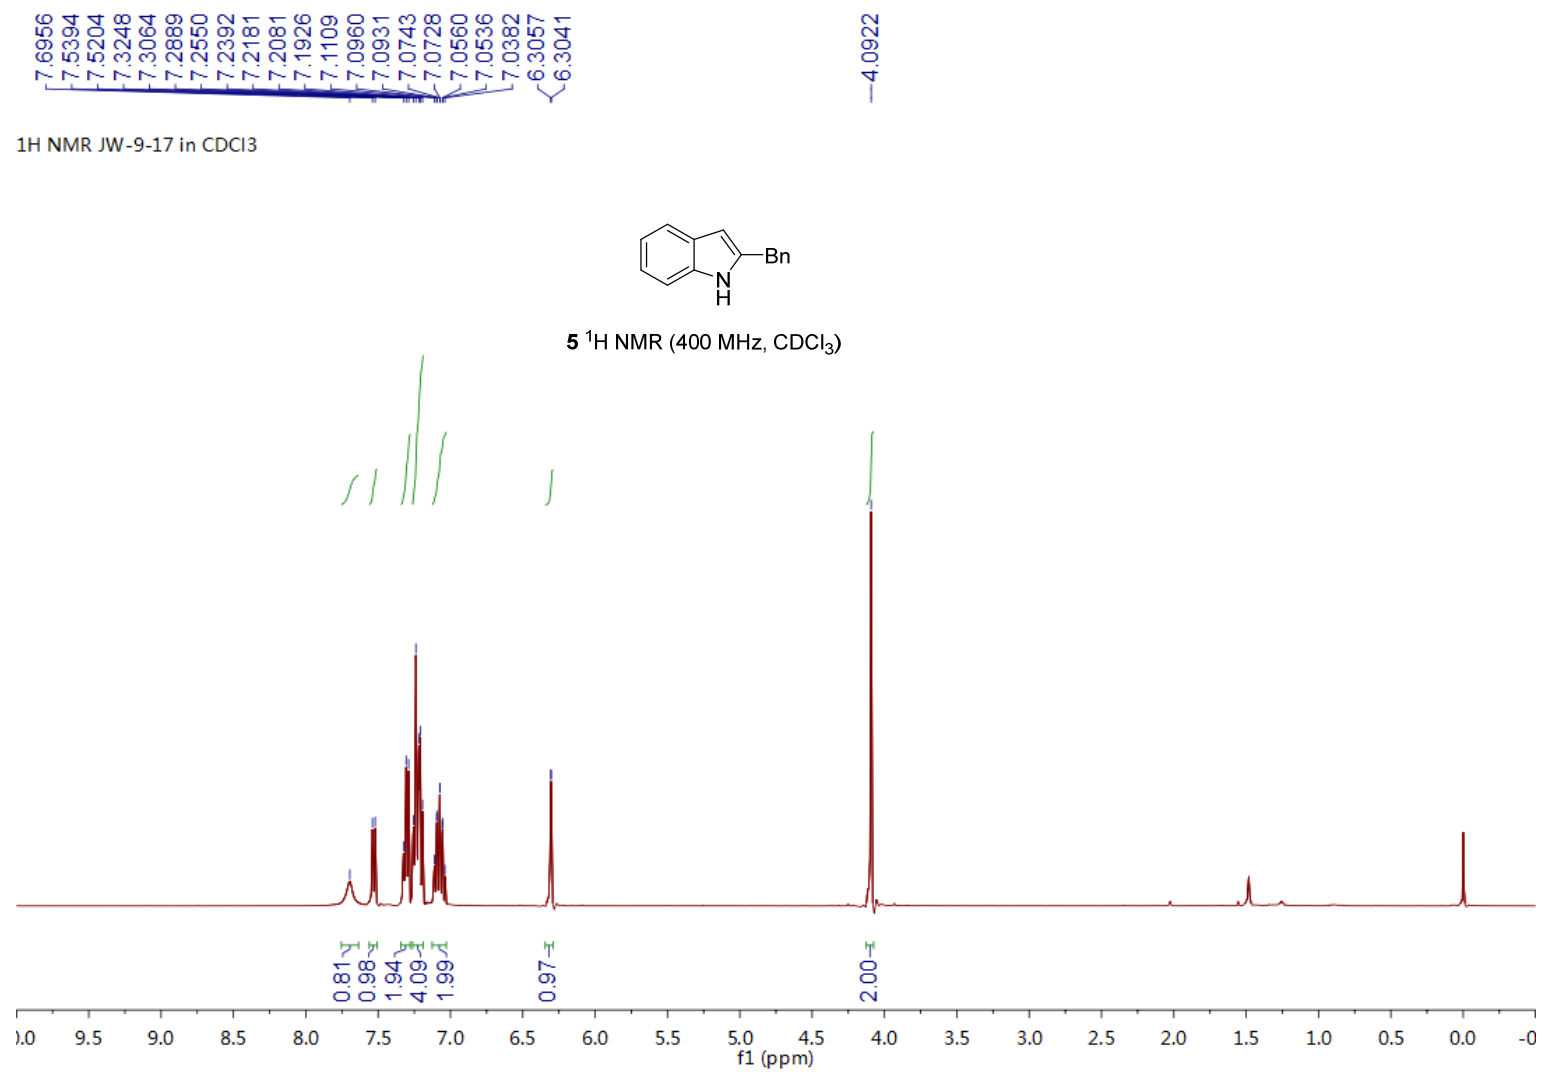

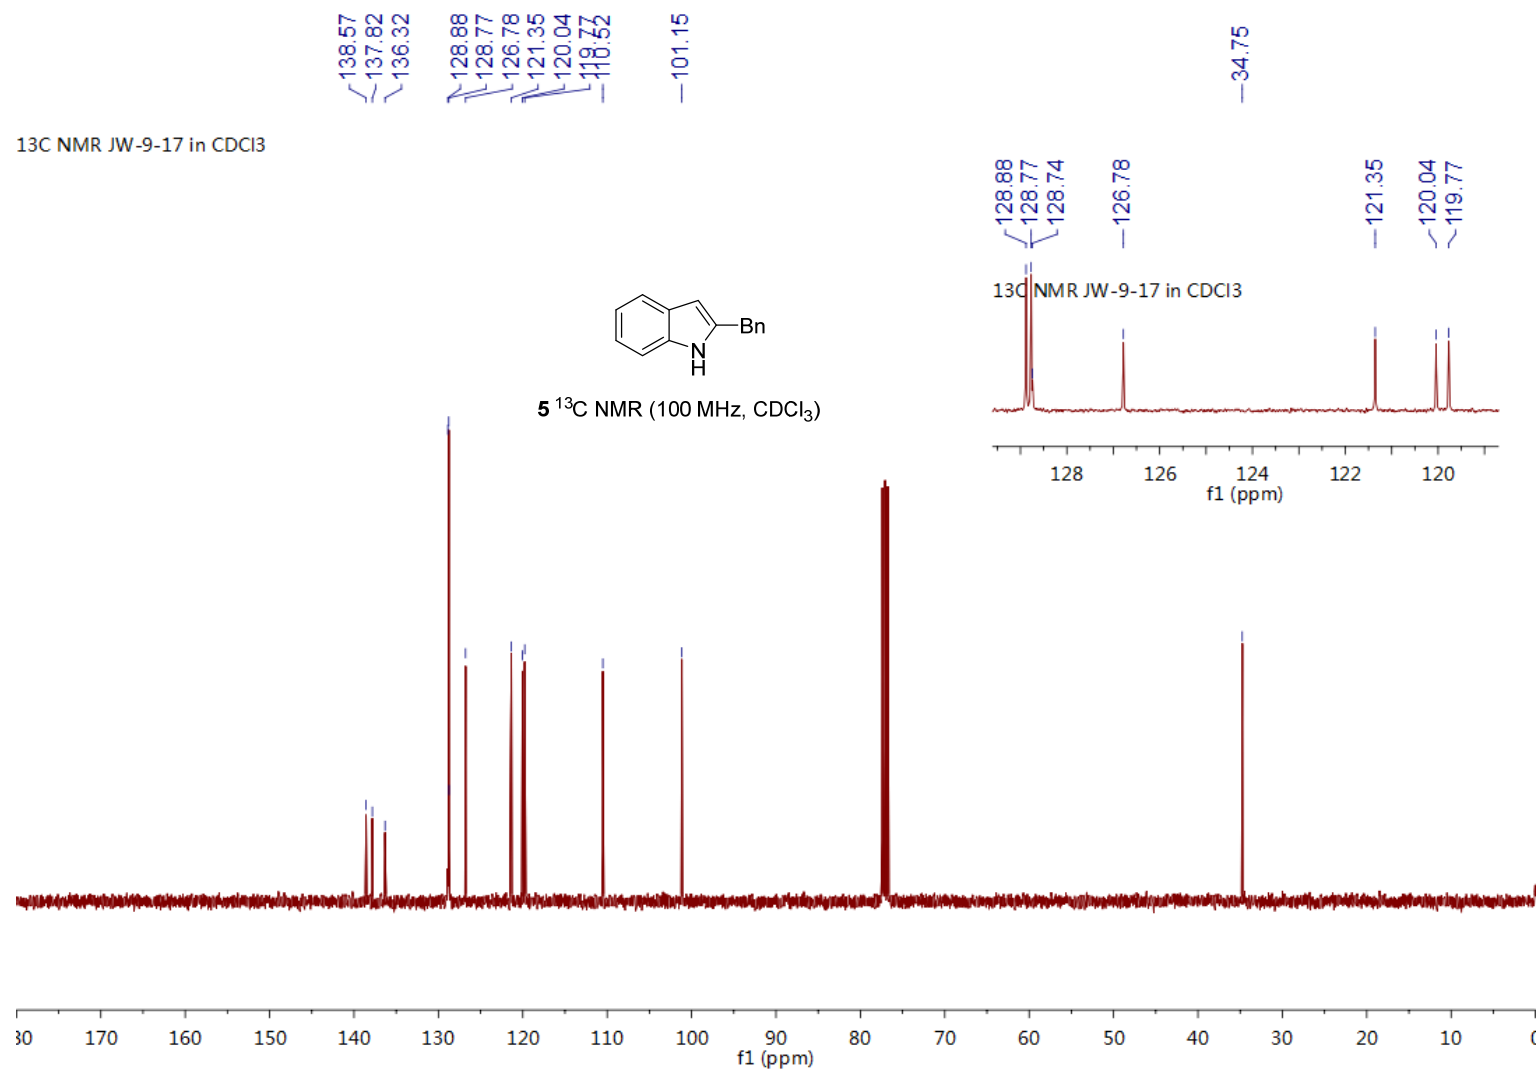

Data File C:\CHEM32\1\DATA\ZHOU-18\YZN008395.D  
Sample Name: CY-26-101+-

```
=====
Acq. Operator   :
Acq. Instrument : Instrument 1          Location : Vial 1
Injection Date  : 5/6/2018 3:07:39 PM
Acq. Method     : C:\CHEM32\1\METHODS\DEF_LC.M
Last changed    : 5/6/2018 3:04:56 PM
                  (modified after loading)
Analysis Method : C:\CHEM32\1\METHODS\DEF_LC.M
Last changed    : 5/6/2018 3:36:04 PM
                  (modified after loading)
Sample Info     : OD-H, Hexane/i-PrOH = 99/1, 1.0mL/min, 30 oC, 254 nm
=====
```

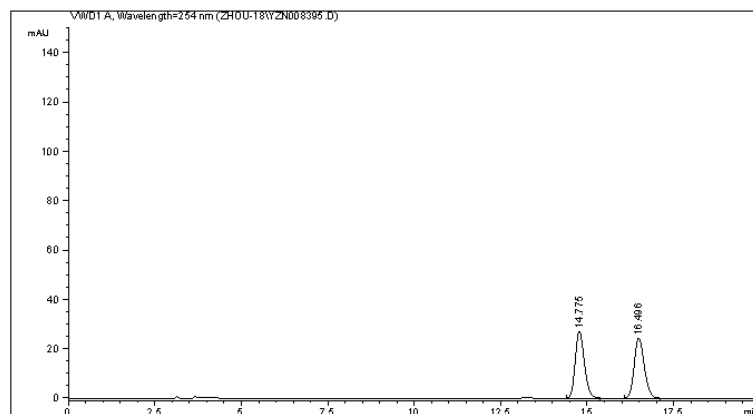

```
=====
Area Percent Report
=====
Sorted By      :      Signal
Multiplier:    :      1.0000
Dilution:      :      1.0000
Use Multiplier & Dilution Factor with ISTDs
```

Signal 1: VWD1 A, Wavelength=254 nm

| Peak # | RetTime [min] | Type | Width [min] | Area mAU*s | Height [mAU] | Area %  |
|--------|---------------|------|-------------|------------|--------------|---------|
| 1      | 14.775        | BB   | 0.2846      | 500.49707  | 27.19790     | 50.3035 |
| 2      | 16.496        | BB   | 0.3147      | 494.45779  | 24.43822     | 49.6965 |

Totals : 994.95486 51.63612

```
=====
*** End of Report ***
```

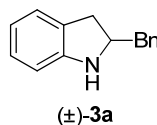

Data File C:\CHEM32\1\DATA\ZHOU-18\YZN008394.D  
Sample Name: CY-26-101

```
=====
Acq. Operator   :
Acq. Instrument : Instrument 1          Location : Vial 1
Injection Date   : 5/6/2018 2:44:56 PM
Acq. Method      : C:\CHEM32\1\METHODS\DEF_LC.M
Last changed     : 5/6/2018 2:21:23 PM
                  (modified after loading)
Analysis Method  : C:\CHEM32\1\METHODS\DEF_LC.M
Last changed     : 5/6/2018 3:34:45 PM
                  (modified after loading)
Sample Info      : OD-H, Hexane/i-PrOH = 99/1, 1.0mL/min, 30 oC, 254 nm
=====
```

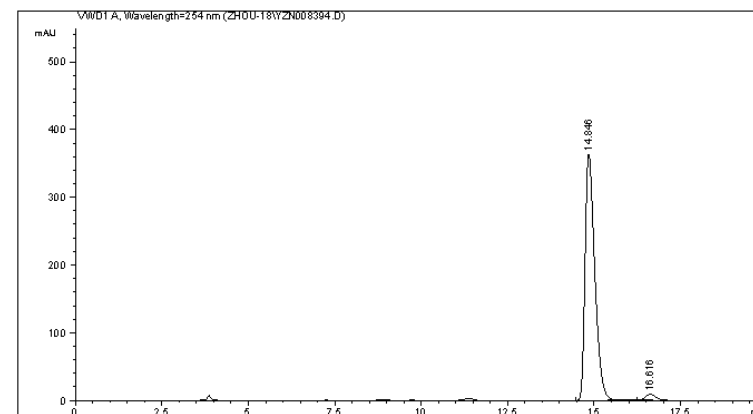

```
=====
Area Percent Report
=====
Sorted By      :      Signal
Multiplier:    :      1.0000
Dilution:      :      1.0000
Use Multiplier & Dilution Factor with ISTDs
```

Signal 1: VWD1 A, Wavelength=254 nm

| Peak # | RetTime [min] | Type | Width [min] | Area mAU*s | Height [mAU] | Area %  |
|--------|---------------|------|-------------|------------|--------------|---------|
| 1      | 14.846        | BB   | 0.2992      | 7110.40674 | 364.07016    | 97.4869 |
| 2      | 16.616        | BB   | 0.3163      | 183.29590  | 8.99711      | 2.5131  |

Totals : 7293.70264 373.06727

```
=====
*** End of Report ***
```

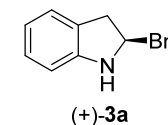

Data File C:\CHEM32\1\DATA\ZHOU-18\YZN008760.D  
Sample Name: jw-9-11A(+)

```
=====
Acq. Operator   :
Acq. Instrument : Instrument 1          Location : Vial 1
Injection Date  : 6/3/2018 4:27:27 PM
Acq. Method     : C:\CHEM32\1\METHODS\DEF_LC.M
Last changed    : 6/3/2018 4:25:15 PM by
                  (modified after loading)
Analysis Method : C:\CHEM32\1\METHODS\DEF_LC.M
Last changed    : 6/10/2018 4:11:59 PM
                  (modified after loading)
Sample Info     : OD-H, Hexane/i-PrOH =99/1, 1.0 mL/min, 30 oC, 254 nm
=====
```

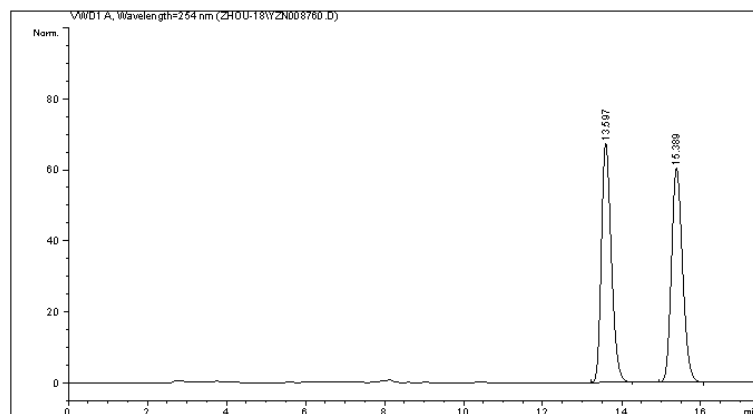

```
=====
Area Percent Report
=====
Sorted By      :      Signal
Multiplier:    :      1.0000
Dilution:      :      1.0000
Use Multiplier & Dilution Factor with ISTDs
```

Signal 1: VWD1 A, Wavelength=254 nm

| Peak # | RetTime [min] | Type | Width [min] | Area mAU   | Height % | Area %  |
|--------|---------------|------|-------------|------------|----------|---------|
| 1      | 13.597        | BB   | 0.2699      | 1177.79517 | 67.23775 | 49.9936 |
| 2      | 15.389        | BB   | 0.3021      | 1178.09595 | 60.31648 | 50.0064 |

Totals : 2355.89111 127.55423

```
=====
*** End of Report ***
```

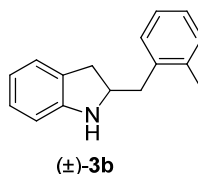

Data File C:\CHEM32\1\DATA\ZHOU-18\YZN008759.D  
Sample Name: jw-9-11A

```
=====
Acq. Operator   :
Acq. Instrument : Instrument 1          Location : Vial 1
Injection Date   : 6/3/2018 4:06:08 PM
Acq. Method     : C:\CHEM32\1\METHODS\DEF_LC.M
Last changed    : 6/3/2018 4:02:59 PM by
                  (modified after loading)
Analysis Method : C:\CHEM32\1\METHODS\DEF_LC.M
Last changed    : 6/10/2018 4:11:10 PM
                  (modified after loading)
Sample Info     : OD-H, Hexane/i-PrOH =99/1, 1.0 mL/min, 30 oC, 254 nm
=====
```

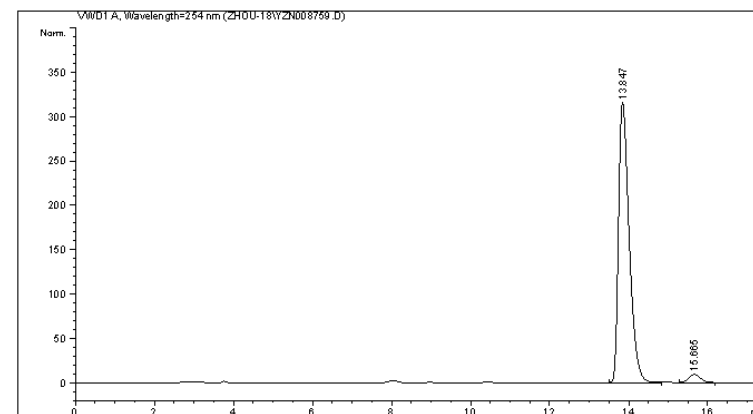

```
=====
Area Percent Report
=====
Sorted By      :      Signal
Multiplier:    :      1.0000
Dilution:      :      1.0000
Use Multiplier & Dilution Factor with ISTDs
```

Signal 1: VWD1 A, Wavelength=254 nm

| Peak # | RetTime [min] | Type | Width [min] | Area mAU   | Height %  | Area %  |
|--------|---------------|------|-------------|------------|-----------|---------|
| 1      | 13.847        | BB   | 0.2861      | 5887.67676 | 315.56094 | 96.9825 |
| 2      | 15.665        | BB   | 0.3069      | 183.19060  | 9.24295   | 3.0175  |

Totals : 6070.86736 324.80389

```
=====
*** End of Report ***
```

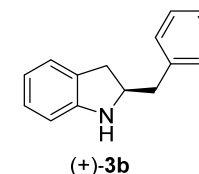

Data File C:\CHEM32\1\DATA\ZHOU-18\YZN008758.D  
Sample Name: jw-9-11B(+)

=====

Acq. Operator :  
Acq. Instrument : Instrument 1 Location : Vial 1  
Injection Date : 6/3/2018 3:45:42 PM  
Acq. Method : C:\CHEM32\1\METHODS\DEF LC.M  
Last changed : 6/3/2018 3:44:03 PM by  
(modified after loading)  
Analysis Method : C:\CHEM32\1\METHODS\DEF LC.M  
Last changed : 6/10/2018 4:13:53 PM  
(modified after loading)  
Sample Info : OD-H, Hexane/i-PrOH =99/1, 1.0 mL/min, 30 oC, 254 nm

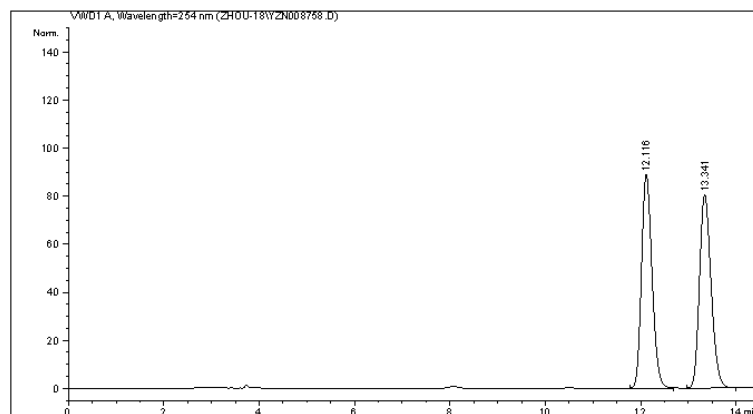

Area Percent Report

Sorted By : Signal  
Multiplier: : 1.0000  
Dilution: : 1.0000  
Use Multiplier & Dilution Factor with ISTDs

Signal 1: VWD1 A, Wavelength=254 nm

| Peak # | RetTime [min] | Type | Width [min] | Area mAU   | Height %s | Area %  |
|--------|---------------|------|-------------|------------|-----------|---------|
| 1      | 12.116        | BB   | 0.2374      | 1365.78735 | 88.94563  | 50.0283 |
| 2      | 13.341        | BB   | 0.2632      | 1364.24390 | 80.52128  | 49.9717 |

Totals : 2730.03125 169.46690

\*\*\* End of Report \*\*\*

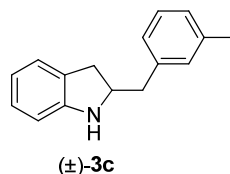

(+)-3c

Data File C:\CHEM32\1\DATA\ZHOU-18\YZN008761.D  
Sample Name: jw-9-11B

=====

Acq. Operator :  
Acq. Instrument : Instrument 1 Location : Vial 1  
Injection Date : 6/3/2018 4:48:00 PM  
Acq. Method : C:\CHEM32\1\METHODS\DEF LC.M  
Last changed : 6/3/2018 4:45:48 PM by  
(modified after loading)  
Analysis Method : C:\CHEM32\1\METHODS\DEF LC.M  
Last changed : 6/10/2018 4:13:01 PM  
(modified after loading)  
Sample Info : OD-H, Hexane/i-PrOH =99/1, 1.0 mL/min, 30 oC, 254 nm

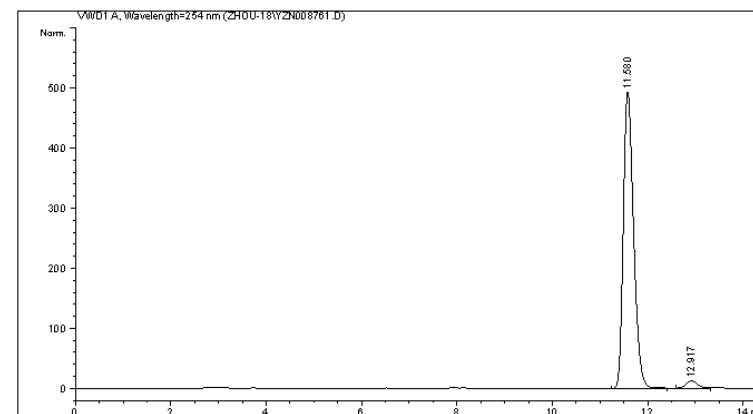

Area Percent Report

Sorted By : Signal  
Multiplier: : 1.0000  
Dilution: : 1.0000  
Use Multiplier & Dilution Factor with ISTDs

Signal 1: VWD1 A, Wavelength=254 nm

| Peak # | RetTime [min] | Type | Width [min] | Area mAU   | Height %s | Area %  |
|--------|---------------|------|-------------|------------|-----------|---------|
| 1      | 11.580        | BB   | 0.2292      | 7352.47070 | 493.38843 | 97.3795 |
| 2      | 12.917        | BV   | 0.2506      | 197.85622  | 12.18607  | 2.6205  |

Totals : 7550.32692 505.57450

\*\*\* End of Report \*\*\*

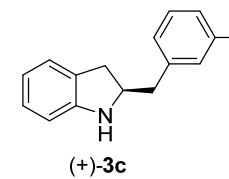

(+)-3c

Data File C:\CHEM32\1\DATA\ZHOU-18\YZN008735.D  
Sample Name: JW-9-10B(+)

=====

Acq. Operator :  
Acq. Instrument : Instrument 1 Location : Vial 1  
Injection Date : 6/1/2018 8:17:02 PM  
Acq. Method : C:\CHEM32\1\METHODS\DEF\_LC.M  
Last changed : 6/1/2018 8:14:26 PM  
(modified after loading)  
Analysis Method : C:\CHEM32\1\METHODS\DEF\_LC.M  
Last changed : 6/10/2018 4:07:40 PM  
(modified after loading)  
Sample Info : OD-H, Hexane/i-PrOH =99/1, 1.0 mL/min, 30 oC, 254 nm

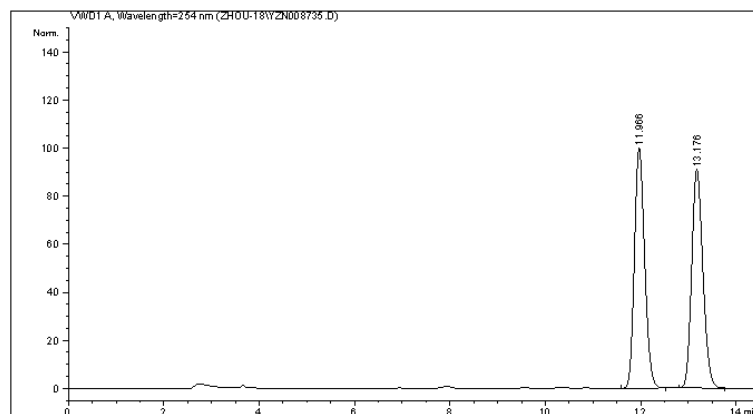

=====  
Area Percent Report  
=====

Sorted By : Signal  
Multiplier: : 1.0000  
Dilution: : 1.0000  
Use Multiplier & Dilution Factor with ISTDs

Signal 1: VWD1 A, Wavelength=254 nm

| Peak # | RetTime [min] | Type | Width [min] | Area mAU   | Height %s | Area [mAU] | Area % |
|--------|---------------|------|-------------|------------|-----------|------------|--------|
| 1      | 11.966        | BB   | 0.2309      | 1489.76465 | 99.82134  | 50.0914    |        |
| 2      | 13.176        | BB   | 0.2532      | 1484.32629 | 90.84733  | 49.9086    |        |

Totals : 2974.09094 190.66867

=====  
\*\*\* End of Report \*\*\*

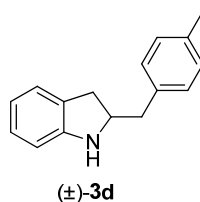

Data File C:\CHEM32\1\DATA\ZHOU-18\YZN008737.D  
Sample Name: JW-9-10B

=====

Acq. Operator :  
Acq. Instrument : Instrument 1 Location : Vial 1  
Injection Date : 6/1/2018 8:55:17 PM  
Acq. Method : C:\CHEM32\1\METHODS\DEF\_LC.M  
Last changed : 6/1/2018 8:53:33 PM by  
(modified after loading)  
Analysis Method : C:\CHEM32\1\METHODS\DEF\_LC.M  
Last changed : 6/10/2018 4:05:11 PM  
(modified after loading)  
Sample Info : OD-H, Hexane/i-PrOH =99/1, 1.0 mL/min, 30 oC, 254 nm

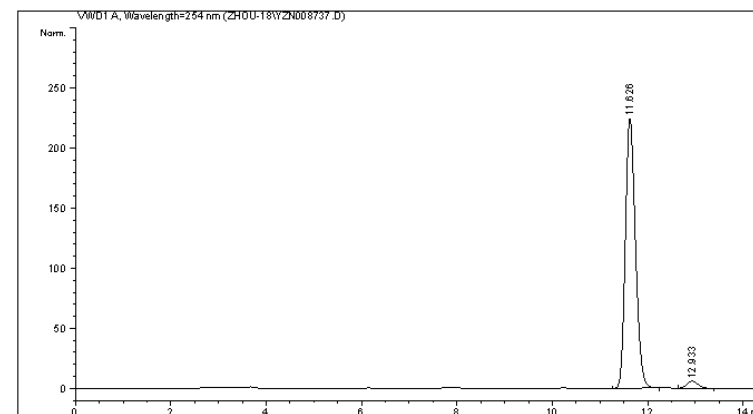

=====  
Area Percent Report  
=====

Sorted By : Signal  
Multiplier: : 1.0000  
Dilution: : 1.0000  
Use Multiplier & Dilution Factor with ISTDs

Signal 1: VWD1 A, Wavelength=254 nm

| Peak # | RetTime [min] | Type | Width [min] | Area mAU   | Height %s | Area [mAU] | Area % |
|--------|---------------|------|-------------|------------|-----------|------------|--------|
| 1      | 11.626        | BB   | 0.2278      | 3290.12695 | 224.42123 | 97.2877    |        |
| 2      | 12.933        | BB   | 0.2442      | 91.72623   | 5.84698   | 2.7123     |        |

Totals : 3381.85318 230.26822

=====  
\*\*\* End of Report \*\*\*

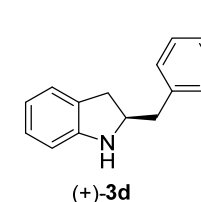

Data File C:\CHEM32\1\DATA\ZHOU-18\YZN008397.D  
Sample Name: CY-27-6+-

```
=====
Acq. Operator   :
Acq. Instrument : Instrument 1          Location : Vial 1
Injection Date  : 5/6/2018 3:59:20 PM
Acq. Method     : C:\CHEM32\1\METHODS\DEF_LC.M
Last changed    : 5/6/2018 3:54:53 PM
                  (modified after loading)
Analysis Method : C:\CHEM32\1\METHODS\DEF_LC.M
Last changed    : 5/8/2018 10:47:28 AM
                  (modified after loading)
Sample Info     : OD-H, Hexane/i-PrOH = 97/3, 0.8 mL/min, 30 oC, 254 nm
=====
```

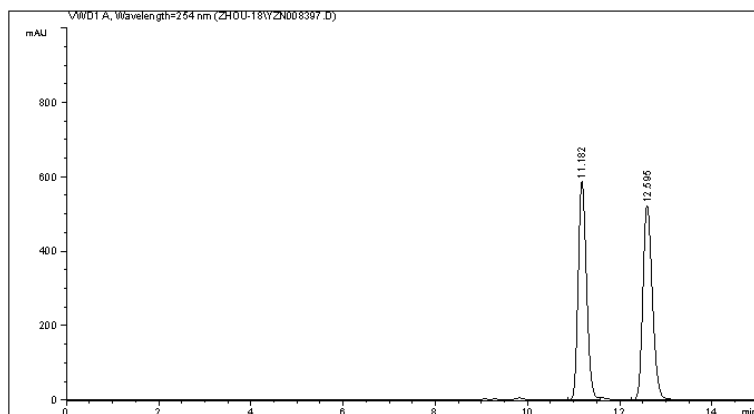

```
=====
Area Percent Report
=====
Sorted By      :      Signal
Multiplier:    :      1.0000
Dilution:      :      1.0000
Use Multiplier & Dilution Factor with ISTDs
```

Signal 1: VWD1 A, Wavelength=254 nm

| Peak # | RetTime [min] | Type | Width [min] | Area mAU*s | Height [mAU] | Area %  |
|--------|---------------|------|-------------|------------|--------------|---------|
| 1      | 11.182        | BV   | 0.1944      | 7358.73682 | 586.76031    | 49.6127 |
| 2      | 12.595        | BB   | 0.2221      | 7473.63721 | 522.89587    | 50.3873 |

Totals : 1.48324e4 1109.65619

```
=====
*** End of Report ***
```

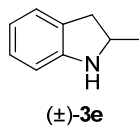

Data File C:\CHEM32\1\DATA\ZHOU-18\YZN008426.D  
Sample Name: CY-27-6

```
=====
Acq. Operator   :
Acq. Instrument : Instrument 1          Location : Vial 1
Injection Date   : 5/8/2018 11:05:05 AM
Acq. Method     : C:\CHEM32\1\METHODS\DEF_LC.M
Last changed    : 5/8/2018 10:45:15 AM
                  (modified after loading)
Analysis Method : C:\CHEM32\1\METHODS\DEF_LC.M
Last changed    : 5/8/2018 11:26:22 AM
                  (modified after loading)
Sample Info     : OD-H, Hexane/i-PrOH = 97/3, 0.8 mL/min, 30 oC, 254 nm
=====
```

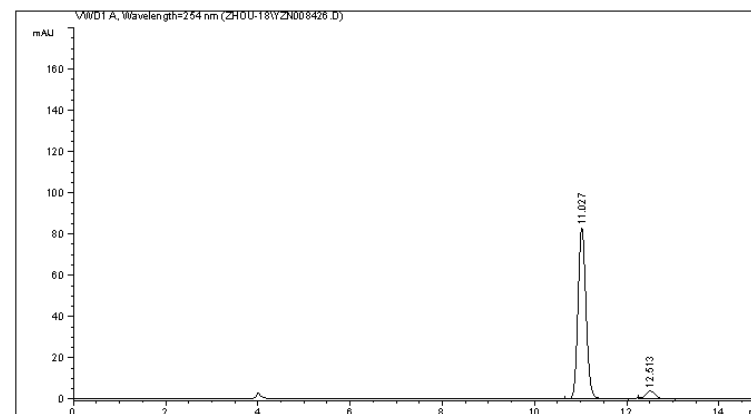

```
=====
Area Percent Report
=====
Sorted By      :      Signal
Multiplier:    :      1.0000
Dilution:      :      1.0000
Use Multiplier & Dilution Factor with ISTDs
```

Signal 1: VWD1 A, Wavelength=254 nm

| Peak # | RetTime [min] | Type | Width [min] | Area mAU*s | Height [mAU] | Area %  |
|--------|---------------|------|-------------|------------|--------------|---------|
| 1      | 11.027        | MM R | 0.2022      | 1007.92560 | 83.06752     | 94.8035 |
| 2      | 12.513        | MM R | 0.2392      | 55.24738   | 3.84912      | 5.1965  |

Totals : 1063.17298 86.91664

```
=====
*** End of Report ***
```

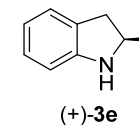

Data File C:\CHEM32\1\DATA\ZHOU-18\YZN008822.D  
Sample Name: JW-9-14B(+)

=====

Acq. Operator :  
Acq. Instrument : Instrument 1 Location : Vial 1  
Injection Date : 6/6/2018 5:43:46 PM  
Acq. Method : C:\CHEM32\1\METHODS\DEF LC.M  
Last changed : 6/6/2018 5:40:47 PM by  
(modified after loading)  
Analysis Method : C:\CHEM32\1\METHODS\DEF LC.M  
Last changed : 6/10/2018 4:16:13 PM  
(modified after loading)  
Sample Info : OD-H, Hexane/i-PrOH =95/5, 1.0 mL/min, 30 oC, 254 nm

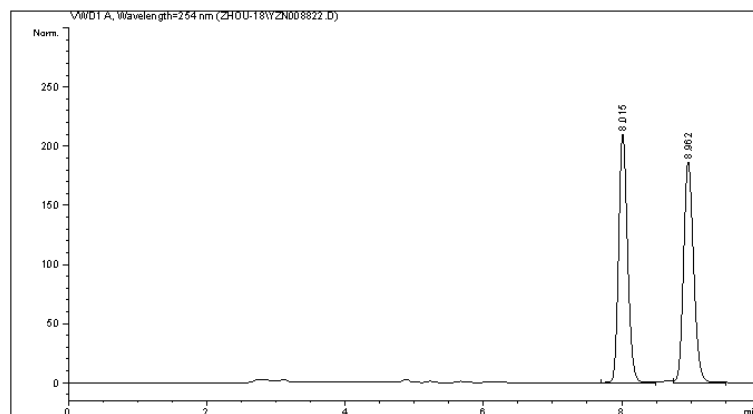

Area Percent Report

Sorted By : Signal  
Multiplier: : 1.0000  
Dilution: : 1.0000  
Use Multiplier & Dilution Factor with ISTDs

Signal 1: VWD1 A, Wavelength=254 nm

| Peak # | RetTime [min] | Type | Width [min] | Area mAU   | Height %s | Area [mAU] | Area % |
|--------|---------------|------|-------------|------------|-----------|------------|--------|
| 1      | 8.015         | BB   | 0.1390      | 1876.17773 | 210.42880 | 49.9859    |        |
| 2      | 8.962         | VB   | 0.1552      | 1877.23914 | 186.71622 | 50.0141    |        |

Totals : 3753.41687 397.14502

\*\*\* End of Report \*\*\*

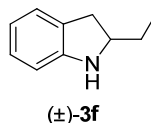

Data File C:\CHEM32\1\DATA\ZHOU-18\YZN008824.D  
Sample Name: JW-9-15B

=====

Acq. Operator :  
Acq. Instrument : Instrument 1 Location : Vial 1  
Injection Date : 6/6/2018 6:09:12 PM  
Acq. Method : C:\CHEM32\1\METHODS\DEF LC.M  
Last changed : 6/6/2018 6:06:59 PM by  
(modified after loading)  
Analysis Method : C:\CHEM32\1\METHODS\DEF LC.M  
Last changed : 6/10/2018 4:15:24 PM  
(modified after loading)  
Sample Info : OD-H, Hexane/i-PrOH =95/5, 1.0 mL/min, 30 oC, 254 nm

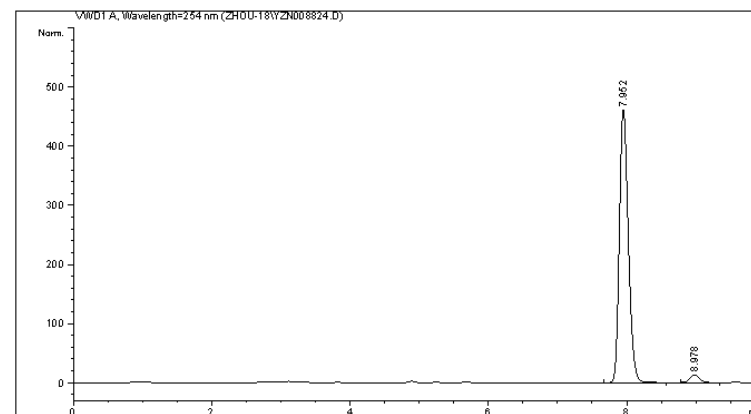

Area Percent Report

Sorted By : Signal  
Multiplier: : 1.0000  
Dilution: : 1.0000  
Use Multiplier & Dilution Factor with ISTDs

Signal 1: VWD1 A, Wavelength=254 nm

| Peak # | RetTime [min] | Type | Width [min] | Area mAU   | Height %s | Area [mAU] | Area % |
|--------|---------------|------|-------------|------------|-----------|------------|--------|
| 1      | 7.952         | BB   | 0.1381      | 4146.00977 | 462.17194 | 96.8127    |        |
| 2      | 8.978         | BB   | 0.1569      | 136.49561  | 13.37699  | 3.1873     |        |

Totals : 4282.50537 475.54893

\*\*\* End of Report \*\*\*

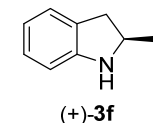



Data File C:\CHEM32\1\DATA\ZHOU-18\YZN008823.D  
Sample Name: JW-9-15C(+)

```
=====
Acq. Operator   :
Acq. Instrument : Instrument 1          Location : Vial 1
Injection Date  : 6/6/2018 5:55:57 PM
Acq. Method     : C:\CHEM32\1\METHODS\DEF LC.M
Last changed    : 6/6/2018 5:54:24 PM by
                  (modified after loading)
Analysis Method : C:\CHEM32\1\METHODS\DEF LC.M
Last changed    : 6/10/2018 4:17:59 PM
                  (modified after loading)
Sample Info     : OD-H, Hexane/i-PrOH =95/5, 1.0 mL/min, 30 oC, 254 nm
=====
```

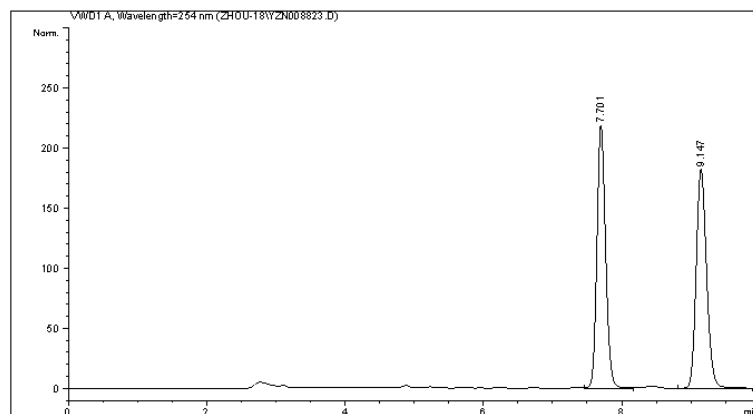

```
=====
Area Percent Report
=====
Sorted By      :      Signal
Multiplier:    :      1.0000
Dilution:      :      1.0000
Use Multiplier & Dilution Factor with ISTDs
```

Signal 1: VWD1 A, Wavelength=254 nm

| Peak # | RetTime [min] | Type | Width [min] | Area mAU   | Height %s | Area [mAU] | Area % |
|--------|---------------|------|-------------|------------|-----------|------------|--------|
| 1      | 7.701         | VV   | 0.1352      | 1909.96460 | 219.01628 | 50.0737    |        |
| 2      | 9.147         | VB   | 0.1613      | 1904.33984 | 182.16226 | 49.9263    |        |

Totals : 3814.30444 401.17854

```
=====
*** End of Report ***
```

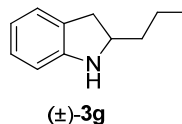

Data File C:\CHEM32\1\DATA\ZHOU-18\YZN008825.D  
Sample Name: JW-9-15C

```
=====
Acq. Operator   :
Acq. Instrument : Instrument 1          Location : Vial 1
Injection Date   : 6/6/2018 6:21:08 PM
Acq. Method     : C:\CHEM32\1\METHODS\DEF LC.M
Last changed    : 6/6/2018 6:19:14 PM by
                  (modified after loading)
Analysis Method : C:\CHEM32\1\METHODS\DEF LC.M
Last changed    : 6/10/2018 4:17:10 PM
                  (modified after loading)
Sample Info     : OD-H, Hexane/i-PrOH =95/5, 1.0 mL/min, 30 oC, 254 nm
=====
```

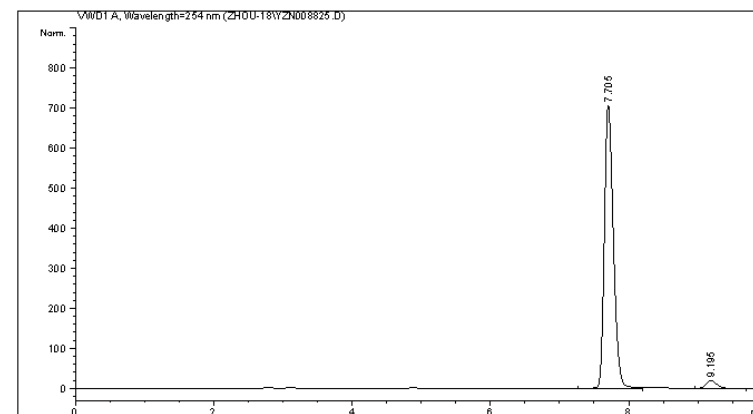

```
=====
Area Percent Report
=====
Sorted By      :      Signal
Multiplier:    :      1.0000
Dilution:      :      1.0000
Use Multiplier & Dilution Factor with ISTDs
```

Signal 1: VWD1 A, Wavelength=254 nm

| Peak # | RetTime [min] | Type | Width [min] | Area mAU   | Height %s | Area [mAU] | Area % |
|--------|---------------|------|-------------|------------|-----------|------------|--------|
| 1      | 7.705         | BV   | 0.1387      | 6382.35449 | 707.82910 | 96.8564    |        |
| 2      | 9.195         | BB   | 0.1646      | 207.14548  | 19.50937  | 3.1436     |        |

Totals : 6589.49997 727.33847

```
=====
*** End of Report ***
```

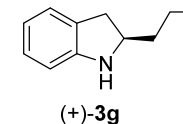

Data File C:\CHEM32\1\DATA\ZHOU-18\YZN008435.D  
Sample Name: CY-27-13+-

```
=====
Acq. Operator   :
Acq. Instrument : Instrument 1          Location : Vial 1
Injection Date  : 5/9/2018 5:51:56 PM
Acq. Method     : C:\CHEM32\1\METHODS\DEF_LC.M
Last changed    : 5/9/2018 5:49:52 PM
                  (modified after loading)
Analysis Method : C:\CHEM32\1\METHODS\DEF_LC.M
Last changed    : 5/9/2018 6:12:16 PM
                  (modified after loading)
Sample Info     : OD-H, Hexane/i-PrOH = 99/1, 1.0 mL/min, 30 oC, 254 nm
=====
```

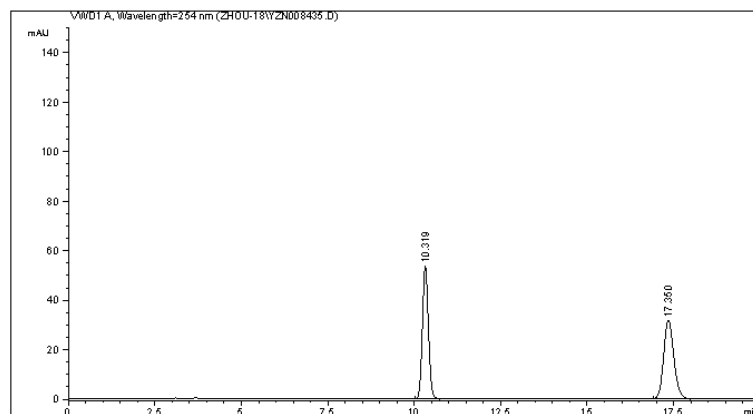

```
=====
Area Percent Report
=====
Sorted By      :      Signal
Multiplier:    :      1.0000
Dilution:      :      1.0000
Use Multiplier & Dilution Factor with ISTDs
```

Signal 1: VWD1 A, Wavelength=254 nm

| Peak #   | RetTime [min] | Type | Width [min] | Area mAU *s | Height [mAU] | Area %  |
|----------|---------------|------|-------------|-------------|--------------|---------|
| 1        | 10.319        | BB   | 0.1875      | 647.21832   | 53.59042     | 50.0688 |
| 2        | 17.350        | BB   | 0.3145      | 645.44043   | 31.73360     | 49.9312 |
| Totals : |               |      |             | 1292.65875  | 85.32402     |         |

```
=====
*** End of Report ***
```

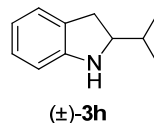

Data File C:\CHEM32\1\DATA\ZHOU-18\YZN008434.D  
Sample Name: CY-27-13

```
=====
Acq. Operator   :
Acq. Instrument : Instrument 1          Location : Vial 1
Injection Date   : 5/9/2018 5:29:43 PM
Acq. Method      : C:\CHEM32\1\METHODS\DEF_LC.M
Last changed     : 5/9/2018 5:09:32 PM
                  (modified after loading)
Analysis Method  : C:\CHEM32\1\METHODS\DEF_LC.M
Last changed     : 5/9/2018 5:52:17 PM
                  (modified after loading)
Sample Info      : OD-H, Hexane/i-PrOH = 99/1, 1.0 mL/min, 30 oC, 254 nm
=====
```

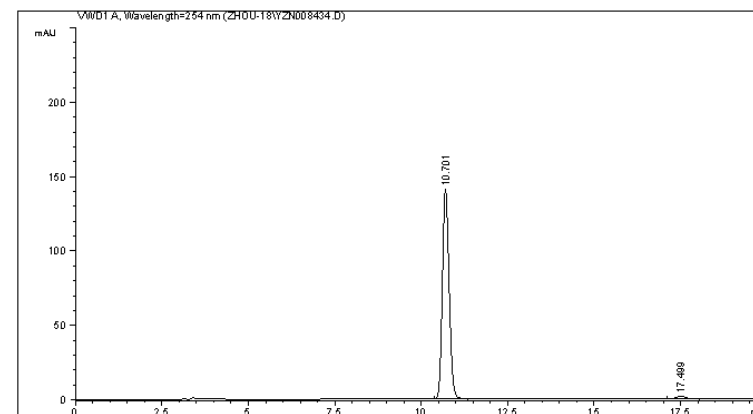

```
=====
Area Percent Report
=====
Sorted By      :      Signal
Multiplier:    :      1.0000
Dilution:      :      1.0000
Use Multiplier & Dilution Factor with ISTDs
```

Signal 1: VWD1 A, Wavelength=254 nm

| Peak #   | RetTime [min] | Type | Width [min] | Area mAU *s | Height [mAU] | Area %  |
|----------|---------------|------|-------------|-------------|--------------|---------|
| 1        | 10.701        | BB   | 0.2109      | 1916.72522  | 141.05399    | 98.1376 |
| 2        | 17.499        | BB   | 0.3154      | 36.37471    | 1.73852      | 1.8624  |
| Totals : |               |      |             | 1953.09993  | 142.79251    |         |

```
=====
*** End of Report ***
```

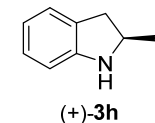

Data File C:\CHEM32\1\DATA\ZHOU-18\YZN008425.D  
Sample Name: CY-27-11+-

```
=====
Acq. Operator   :
Acq. Instrument : Instrument 1          Location : Vial 1
Injection Date  : 5/8/2018 10:17:36 AM
Acq. Method     : C:\CHEM32\1\METHODS\DEF_LC.M
Last changed    : 5/8/2018 10:15:48 AM
                  (modified after loading)
Analysis Method : C:\CHEM32\1\METHODS\DEF_LC.M
Last changed    : 5/8/2018 10:48:54 AM
                  (modified after loading)
Sample Info     : OD-H, Hexane/i-PrOH = 99/1, 1.0 mL/min, 30 oC, 254 nm
=====
```

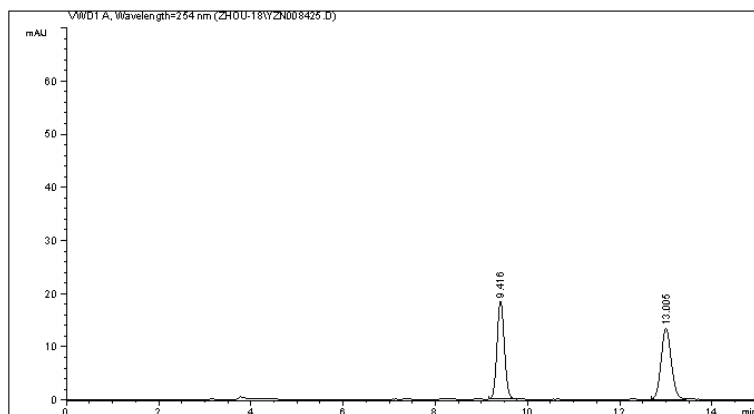

```
=====
Area Percent Report
=====
Sorted By      :      Signal
Multiplier:    :      1.0000
Dilution:      :      1.0000
Use Multiplier & Dilution Factor with ISTDs
```

Signal 1: VWD1 A, Wavelength=254 nm

| Peak # | RetTime [min] | Type | Width [min] | Area mAU*s | Height [mAU] | Area %  |
|--------|---------------|------|-------------|------------|--------------|---------|
| 1      | 9.416         | BB   | 0.1714      | 204.64835  | 18.48359     | 50.1908 |
| 2      | 13.005        | BB   | 0.2356      | 203.09268  | 13.35832     | 49.8092 |

Totals : 407.74103 31.84191

\*\*\* End of Report \*\*\*

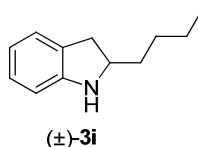

Data File C:\CHEM32\1\DATA\ZHOU-18\YZN008424.D  
Sample Name: CY-27-11

```
=====
Acq. Operator   :
Acq. Instrument : Instrument 1          Location : Vial 1
Injection Date  : 5/8/2018 9:54:25 AM
Acq. Method     : C:\CHEM32\1\METHODS\DEF_LC.M
Last changed    : 5/8/2018 9:51:06 AM
                  (modified after loading)
Analysis Method : C:\CHEM32\1\METHODS\DEF_LC.M
Last changed    : 5/8/2018 9:05:17 AM
                  (modified after loading)
Sample Info     : OD-H, Hexane/i-PrOH = 99/1, 1.0 mL/min, 30 oC, 254 nm
=====
```

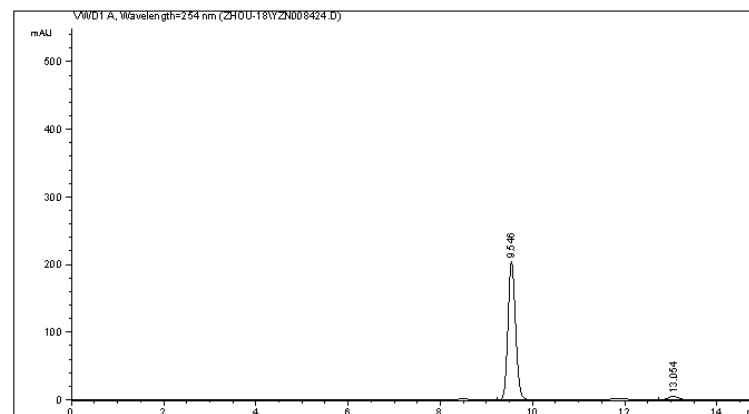

```
=====
Area Percent Report
=====
Sorted By      :      Signal
Multiplier:    :      1.0000
Dilution:      :      1.0000
Use Multiplier & Dilution Factor with ISTDs
```

Signal 1: VWD1 A, Wavelength=254 nm

| Peak # | RetTime [min] | Type | Width [min] | Area mAU*s | Height [mAU] | Area %  |
|--------|---------------|------|-------------|------------|--------------|---------|
| 1      | 9.546         | VB   | 0.1779      | 2323.77856 | 204.19144    | 96.8279 |
| 2      | 13.054        | VB   | 0.2345      | 76.12829   | 5.03897      | 3.1721  |

Totals : 2399.90685 209.23041

\*\*\* End of Report \*\*\*

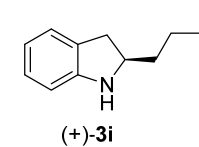

Data File C:\CHEM32\1\DATA\ZHOU-18\YZN008423.D  
Sample Name: CY-27-8+-

=====

|                 |   |                                                       |          |   |        |
|-----------------|---|-------------------------------------------------------|----------|---|--------|
| Acq. Operator   | : |                                                       | Location | : | Vial 1 |
| Acq. Instrument | : | Instrument 1                                          |          |   |        |
| Injection Date  | : | 5/8/2018 9:25:57 AM                                   |          |   |        |
| Acq. Method     | : | C:\CHEM32\1\METHODS\DEF_LC.M                          |          |   |        |
| Last changed    | : | 5/8/2018 9:24:35 AM                                   |          |   |        |
|                 | : | (modified after loading)                              |          |   |        |
| Analysis Method | : | C:\CHEM32\1\METHODS\DEF_LC.M                          |          |   |        |
| Last changed    | : | 5/8/2018 9:05:17 AM                                   |          |   |        |
|                 | : | (modified after loading)                              |          |   |        |
| Sample Info     | : | OD-H, Hexane/i-PrOH = 99/1, 1.0 mL/min, 30 oC, 254 nm |          |   |        |

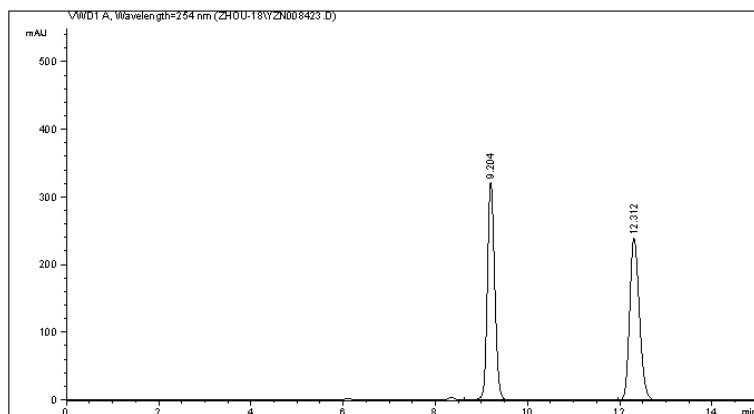

Area Percent Report

Sorted By : Signal  
Multiplier: : 1.0000  
Dilution: : 1.0000  
Use Multiplier & Dilution Factor with ISTDs

Signal 1: VWD1 A, Wavelength=254 nm

| Peak # | RetTime [min] | Type | Width [min] | Area mAU*s | Height [mAU] | Area %  |
|--------|---------------|------|-------------|------------|--------------|---------|
| 1      | 9.204         | VV   | 0.1704      | 3538.93457 | 322.22589    | 50.2287 |
| 2      | 12.312        | BB   | 0.2276      | 3506.70923 | 239.50800    | 49.7713 |

Totals : 7045.64380 561.73389

\*\*\* End of Report \*\*\*

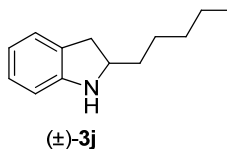

Data File C:\CHEM32\1\DATA\ZHOU-18\YZN008421.D  
Sample Name: CY-27-8

=====

|                 |   |                                                       |          |   |        |
|-----------------|---|-------------------------------------------------------|----------|---|--------|
| Acq. Operator   | : |                                                       | Location | : | Vial 1 |
| Acq. Instrument | : | Instrument 1                                          |          |   |        |
| Injection Date  | : | 5/8/2018 8:45:32 AM                                   |          |   |        |
| Acq. Method     | : | C:\CHEM32\1\METHODS\DEF_LC.M                          |          |   |        |
| Last changed    | : | 5/8/2018 8:41:47 AM                                   |          |   |        |
|                 | : | (modified after loading)                              |          |   |        |
| Analysis Method | : | C:\CHEM32\1\METHODS\DEF_LC.M                          |          |   |        |
| Last changed    | : | 5/8/2018 9:05:17 AM                                   |          |   |        |
|                 | : | (modified after loading)                              |          |   |        |
| Sample Info     | : | OD-H, Hexane/i-PrOH = 99/1, 1.0 mL/min, 30 oC, 254 nm |          |   |        |

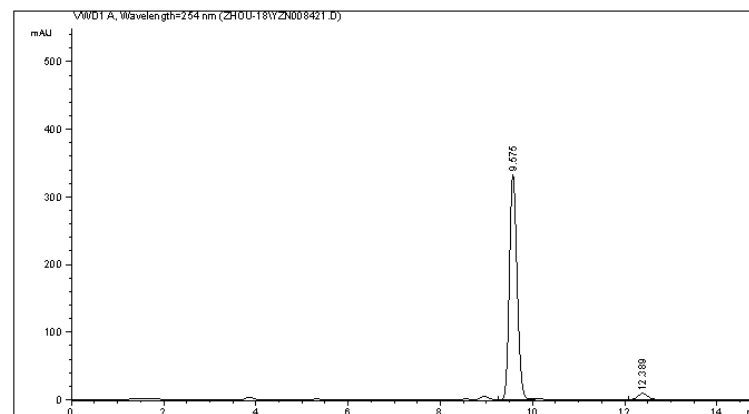

Area Percent Report

Sorted By : Signal  
Multiplier: : 1.0000  
Dilution: : 1.0000  
Use Multiplier & Dilution Factor with ISTDs

Signal 1: VWD1 A, Wavelength=254 nm

| Peak # | RetTime [min] | Type | Width [min] | Area mAU*s | Height [mAU] | Area %  |
|--------|---------------|------|-------------|------------|--------------|---------|
| 1      | 9.575         | VB   | 0.1800      | 3849.57104 | 332.95560    | 96.7103 |
| 2      | 12.389        | BB   | 0.2282      | 130.94591  | 8.91416      | 3.2897  |

Totals : 3980.51695 341.86976

\*\*\* End of Report \*\*\*

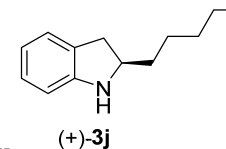

Data File C:\CHEM32\1\DATA\ZHOU-18\YZN008622.D  
Sample Name: CY-27-28A+/-

=====

Acq. Operator :  
Acq. Instrument : Instrument 1 Location : Vial 1  
Injection Date : 5/22/2018 1:26:59 PM  
Acq. Method : C:\CHEM32\1\METHODS\DEF\_LC.M  
Last changed : 5/22/2018 1:23:45 PM  
(modified after loading)  
Analysis Method : C:\CHEM32\1\METHODS\DEF\_LC.M  
Last changed : 5/22/2018 2:05:08 PM  
(modified after loading)  
Sample Info : OD-H, Hexane/i-PrOH = 99/1, 1.0 mL/min, 30 oC, 254 nm

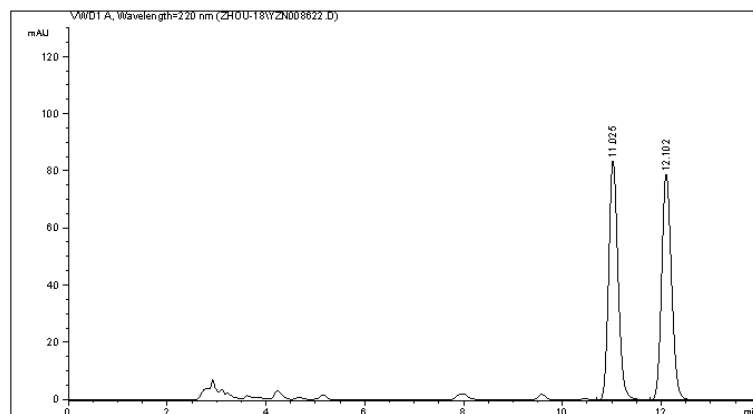

=====

Area Percent Report

=====

Sorted By : Signal  
Multiplier: : 1.0000  
Dilution: : 1.0000  
Use Multiplier & Dilution Factor with ISTDs

Signal 1: VWD1 A, Wavelength=220 nm

| Peak # | RetTime [min] | Type | Width [min] | Area mAU*s | Height [mAU] | Area %  |
|--------|---------------|------|-------------|------------|--------------|---------|
| 1      | 11.025        | VB   | 0.2022      | 1095.52393 | 83.69418     | 50.2155 |
| 2      | 12.102        | BB   | 0.2145      | 1086.12134 | 78.89933     | 49.7845 |

Totals : 2181.64526 162.59351

=====

\*\*\* End of Report \*\*\*

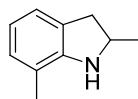

(±)-3k

Data File C:\CHEM32\1\DATA\ZHOU-18\YZN008621.D  
Sample Name: CY-27-28A

=====

Acq. Operator :  
Acq. Instrument : Instrument 1 Location : Vial 1  
Injection Date : 5/22/2018 1:07:09 PM  
Acq. Method : C:\CHEM32\1\METHODS\DEF\_LC.M  
Last changed : 5/22/2018 12:44:05 PM  
(modified after loading)  
Analysis Method : C:\CHEM32\1\METHODS\DEF\_LC.M  
Last changed : 5/22/2018 2:07:03 PM  
(modified after loading)  
Sample Info : OD-H, Hexane/i-PrOH = 99/1, 1.0 mL/min, 30 oC, 254 nm

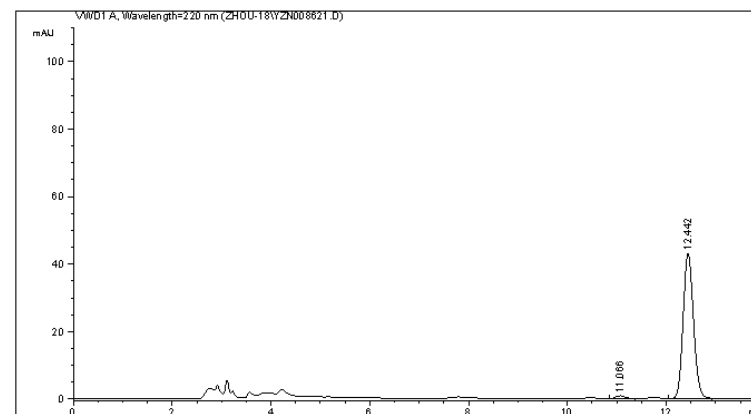

=====

Area Percent Report

=====

Sorted By : Signal  
Multiplier: : 1.0000  
Dilution: : 1.0000  
Use Multiplier & Dilution Factor with ISTDs

Signal 1: VWD1 A, Wavelength=220 nm

| Peak # | RetTime [min] | Type | Width [min] | Area mAU*s | Height [mAU] | Area %  |
|--------|---------------|------|-------------|------------|--------------|---------|
| 1      | 11.066        | MM R | 0.2283      | 12.11573   | 8.84545e-1   | 1.9035  |
| 2      | 12.442        | VB   | 0.2257      | 624.36621  | 43.11478     | 98.0965 |

Totals : 636.48194 43.99933

=====

\*\*\* End of Report \*\*\*

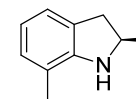

(+)-3k

Data File C:\CHEM32\1\DATA\ZHOU-18\YZN008739.D  
Sample Name: JW-9-10A(+)

=====

Acq. Operator :  
Acq. Instrument : Instrument 1 Location : Vial 1  
Injection Date : 6/1/2018 9:32:39 PM  
Acq. Method : C:\CHEM32\1\METHODS\DEF LC.M  
Last changed : 6/1/2018 9:31:17 PM by  
(modified after loading)  
Analysis Method : C:\CHEM32\1\METHODS\DEF LC.M  
Last changed : 6/10/2018 4:09:58 PM  
(modified after loading)  
Sample Info : OD-H, Hexane/i-PrOH =99/1, 1.0 mL/min, 30 oC, 254 nm

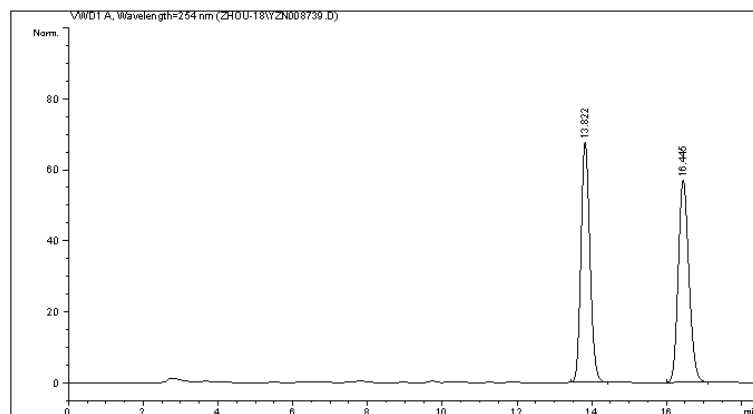

=====

Area Percent Report

=====

Sorted By : Signal  
Multiplier: : 1.0000  
Dilution: : 1.0000  
Use Multiplier & Dilution Factor with ISTDs

Signal 1: VWD1 A, Wavelength=254 nm

| Peak #   | RetTime [min] | Type | Width [min] | Area mAU   | Height %s | Area [mAU] | Area % |
|----------|---------------|------|-------------|------------|-----------|------------|--------|
| 1        | 13.822        | BB   | 0.2571      | 1127.22070 | 67.63029  | 49.9487    |        |
| 2        | 16.445        | BB   | 0.3069      | 1129.53516 | 56.99560  | 50.0513    |        |
| Totals : |               |      |             | 2256.75586 | 124.62589 |            |        |

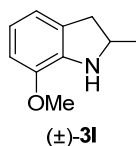

=====

\*\*\* End of Report \*\*\*

Data File C:\CHEM32\1\DATA\ZHOU-18\YZN008738.D  
Sample Name: JW-9-10A

=====

Acq. Operator :  
Acq. Instrument : Instrument 1 Location : Vial 1  
Injection Date : 6/1/2018 9:12:26 PM  
Acq. Method : C:\CHEM32\1\METHODS\DEF LC.M  
Last changed : 6/1/2018 9:10:30 PM by  
(modified after loading)  
Analysis Method : C:\CHEM32\1\METHODS\DEF LC.M  
Last changed : 6/10/2018 4:09:03 PM  
(modified after loading)  
Sample Info : OD-H, Hexane/i-PrOH =99/1, 1.0 mL/min, 30 oC, 254 nm

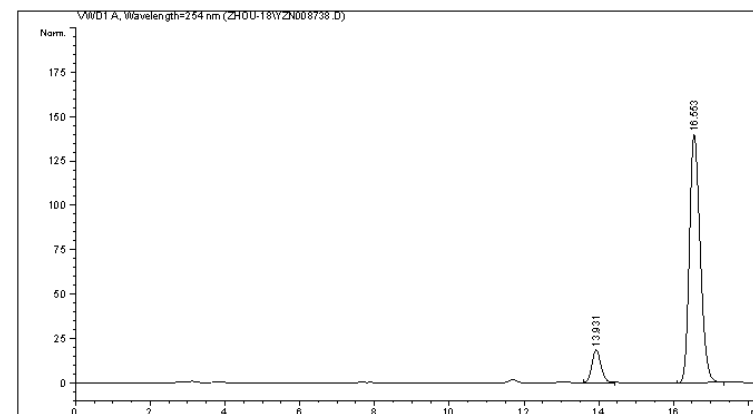

=====

Area Percent Report

=====

Sorted By : Signal  
Multiplier: : 1.0000  
Dilution: : 1.0000  
Use Multiplier & Dilution Factor with ISTDs

Signal 1: VWD1 A, Wavelength=254 nm

| Peak #   | RetTime [min] | Type | Width [min] | Area mAU   | Height %s | Area [mAU] | Area % |
|----------|---------------|------|-------------|------------|-----------|------------|--------|
| 1        | 13.931        | BB   | 0.2565      | 305.32391  | 18.37258  | 9.8454     |        |
| 2        | 16.553        | BB   | 0.3091      | 2795.86841 | 139.75655 | 90.1546    |        |
| Totals : |               |      |             | 3101.19232 | 158.12912 |            |        |

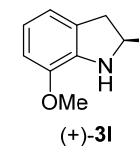

=====

\*\*\* End of Report \*\*\*

Data File C:\CHEM32\1\DATA\ZHOU-18\YZN008820.D  
Sample Name: JW-9-14A(+)

=====

|                   |                                                      |                   |
|-------------------|------------------------------------------------------|-------------------|
| Acq. Operator :   |                                                      | Location : Vial 1 |
| Acq. Instrument : | Instrument 1                                         |                   |
| Injection Date :  | 6/6/2018 4:55:11 PM                                  |                   |
| Acq. Method :     | C:\CHEM32\1\METHODS\DEF LC.M                         |                   |
| Last changed :    | 6/6/2018 4:44:51 PM by                               |                   |
|                   | (modified after loading)                             |                   |
| Analysis Method : | C:\CHEM32\1\METHODS\DEF LC.M                         |                   |
| Last changed :    | 6/10/2018 4:20:09 PM                                 |                   |
|                   | (modified after loading)                             |                   |
| Sample Info :     | OD-H, Hexane/i-PrOH =95/5, 1.0 mL/min, 30 oC, 254 nm |                   |

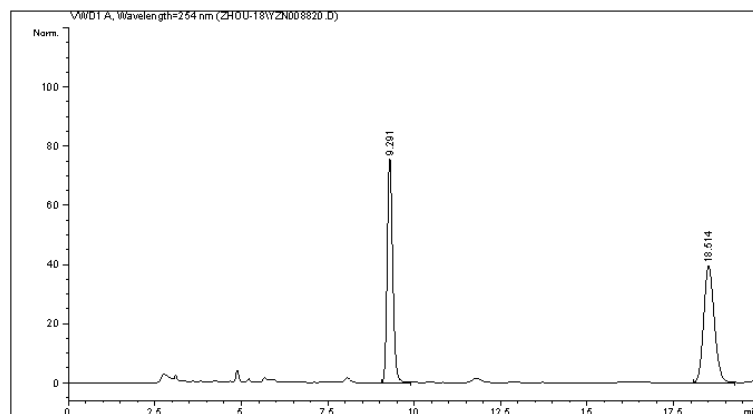

=====

Area Percent Report

=====

|                                             |          |
|---------------------------------------------|----------|
| Sorted By :                                 | Signal   |
| Multiplier:                                 | : 1.0000 |
| Dilution:                                   | : 1.0000 |
| Use Multiplier & Dilution Factor with ISTDs |          |

Signal 1: VWD1 A, Wavelength=254 nm

| Peak # | RetTime [min] | Type | Width [min] | Area mAU  | Height %s | Area [mAU] | Area % |
|--------|---------------|------|-------------|-----------|-----------|------------|--------|
| 1      | 9.291         | BB   | 0.1691      | 833.34967 | 75.74040  | 49.7126    |        |
| 2      | 18.514        | BB   | 0.3308      | 842.98486 | 39.46210  | 50.2874    |        |

Totals : 1676.33453 115.20250

=====

\*\*\* End of Report \*\*\*

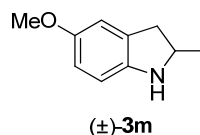

Data File C:\CHEM32\1\DATA\ZHOU-18\YZN008821.D  
Sample Name: JW-9-14A

=====

|                   |                                                      |                   |
|-------------------|------------------------------------------------------|-------------------|
| Acq. Operator :   |                                                      | Location : Vial 1 |
| Acq. Instrument : | Instrument 1                                         |                   |
| Injection Date :  | 6/6/2018 5:20:37 PM                                  |                   |
| Acq. Method :     | C:\CHEM32\1\METHODS\DEF LC.M                         |                   |
| Last changed :    | 6/6/2018 5:16:14 PM by                               |                   |
|                   | (modified after loading)                             |                   |
| Analysis Method : | C:\CHEM32\1\METHODS\DEF LC.M                         |                   |
| Last changed :    | 6/10/2018 4:19:10 PM                                 |                   |
|                   | (modified after loading)                             |                   |
| Sample Info :     | OD-H, Hexane/i-PrOH =95/5, 1.0 mL/min, 30 oC, 254 nm |                   |

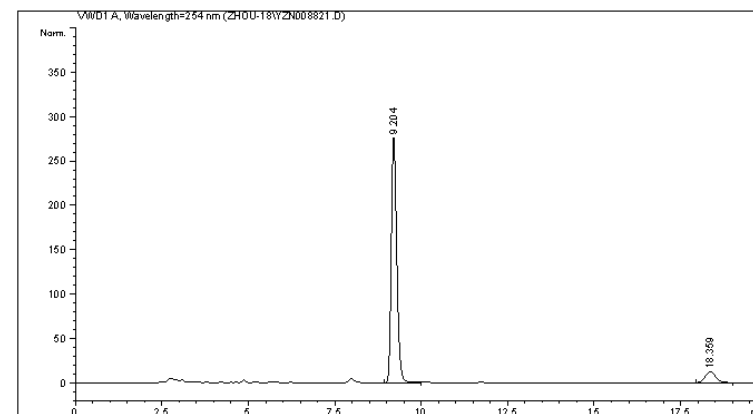

=====

Area Percent Report

=====

|                                             |          |
|---------------------------------------------|----------|
| Sorted By :                                 | Signal   |
| Multiplier:                                 | : 1.0000 |
| Dilution:                                   | : 1.0000 |
| Use Multiplier & Dilution Factor with ISTDs |          |

Signal 1: VWD1 A, Wavelength=254 nm

| Peak # | RetTime [min] | Type | Width [min] | Area mAU   | Height %s | Area [mAU] | Area % |
|--------|---------------|------|-------------|------------|-----------|------------|--------|
| 1      | 9.204         | BB   | 0.1696      | 3054.58105 | 276.70883 | 92.0863    |        |
| 2      | 18.359        | BB   | 0.3305      | 262.50253  | 12.30077  | 7.9137     |        |

Totals : 3317.08359 289.00960

=====

\*\*\* End of Report \*\*\*

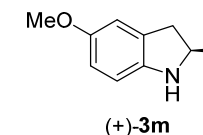

Data File C:\CHEM32\1\DATA\ZHOU-18\YZN008610.D  
Sample Name: CY-27-28B(+/-)

```
=====
Acq. Operator   :
Acq. Instrument : Instrument 1          Location : Vial 1
Injection Date  : 5/21/2018 8:56:36 PM
Acq. Method     : C:\CHEM32\1\METHODS\DEF_LC.M
Last changed    : 5/21/2018 8:55:06 PM
                  (modified after loading)
Analysis Method : C:\CHEM32\1\METHODS\DEF_LC.M
Last changed    : 5/22/2018 12:40:02 PM
                  (modified after loading)
Sample Info     : OD-H, Hexane/i-PrOH = 99/1, 1.0 mL/min, 30 oC, 254 nm
=====
```

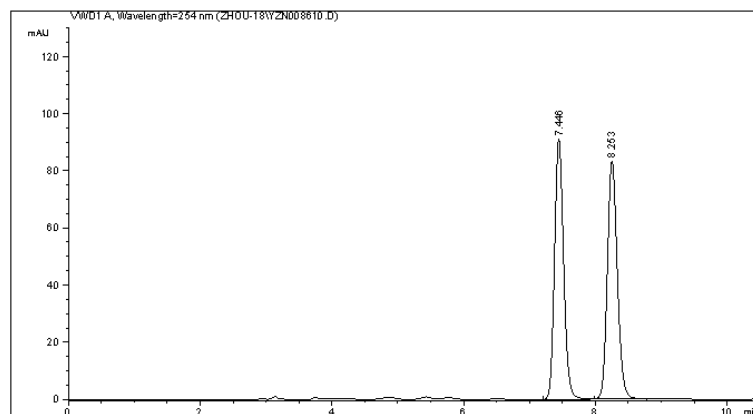

```
=====
Area Percent Report
=====
Sorted By      :      Signal
Multiplier:    :      1.0000
Dilution:      :      1.0000
Use Multiplier & Dilution Factor with ISTDs
```

Signal 1: VWD1 A, Wavelength=254 nm

| Peak # | RetTime [min] | Type | Width [min] | Area mAU*s | Height [mAU] | Area %  |
|--------|---------------|------|-------------|------------|--------------|---------|
| 1      | 7.446         | BB   | 0.1477      | 870.81885  | 91.25665     | 49.8177 |
| 2      | 8.253         | BB   | 0.1633      | 877.19373  | 83.50922     | 50.1823 |

Totals : 1748.01257 174.76587

```
=====
*** End of Report ***
```

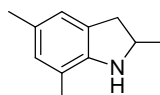

(±)-3n

Data File C:\CHEM32\1\DATA\ZHOU-18\YZN008612.D  
Sample Name: CY-27-28B

```
=====
Acq. Operator   :
Acq. Instrument : Instrument 1          Location : Vial 1
Injection Date   : 5/21/2018 9:26:31 PM
Acq. Method     : C:\CHEM32\1\METHODS\DEF_LC.M
Last changed    : 5/21/2018 9:24:44 PM
                  (modified after loading)
Analysis Method : C:\CHEM32\1\METHODS\DEF_LC.M
Last changed    : 5/22/2018 12:40:02 PM
                  (modified after loading)
Sample Info     : OD-H, Hexane/i-PrOH = 99/1, 1.0 mL/min, 30 oC, 254 nm
=====
```

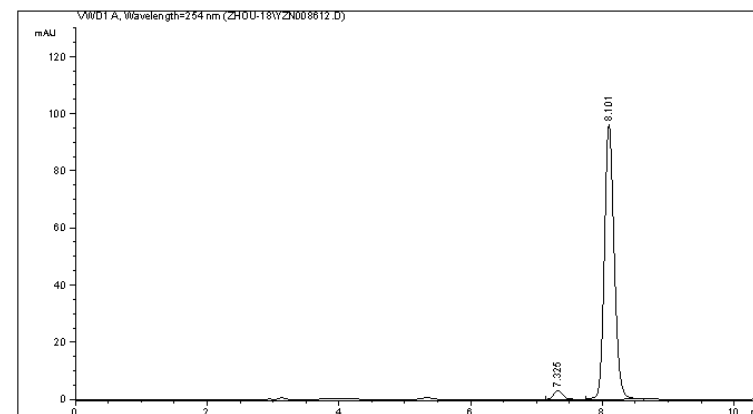

```
=====
Area Percent Report
=====
Sorted By      :      Signal
Multiplier:    :      1.0000
Dilution:      :      1.0000
Use Multiplier & Dilution Factor with ISTDs
```

Signal 1: VWD1 A, Wavelength=254 nm

| Peak # | RetTime [min] | Type | Width [min] | Area mAU*s | Height [mAU] | Area %  |
|--------|---------------|------|-------------|------------|--------------|---------|
| 1      | 7.325         | BB   | 0.1453      | 28.57020   | 3.06216      | 2.7987  |
| 2      | 8.101         | BB   | 0.1598      | 992.28149  | 96.09990     | 97.2013 |

Totals : 1020.85170 99.16206

```
=====
*** End of Report ***
```

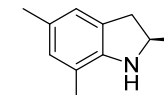

(+)-3n



Data File C:\CHEM32\1\DATA\ZHOU-18\YZN009688.D  
Sample Name: CY-28-33+-

=====

Acq. Operator :  
Acq. Instrument : Instrument 1 Location : -  
Injection Date : 8/2/2018 5:24:52 PM  
Acq. Method : C:\CHEM32\1\METHODS\DEF\_LC11.M  
Last changed : 8/2/2018 5:21:43 PM  
(modified after loading)  
Analysis Method : C:\CHEM32\1\METHODS\DEF\_LC11.M  
Last changed : 8/2/2018 7:31:16 PM  
(modified after loading)  
Sample Info : 0D-H, Hexane/i-PrOH = 90/10, 1.0 mL/min, 30 oC, 254 nm

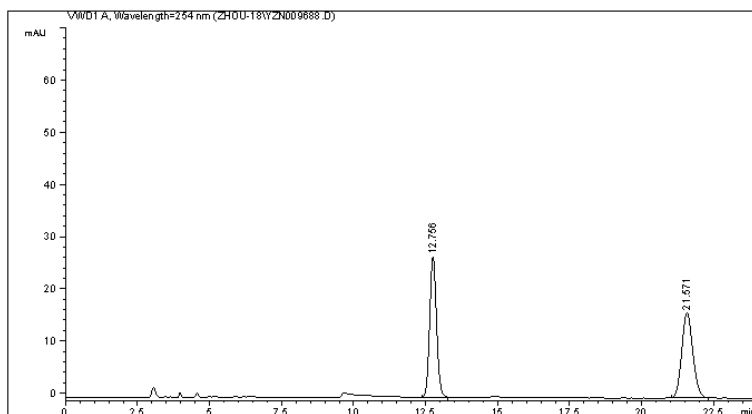

=====

Area Percent Report

=====

Sorted By : Signal  
Multiplier: : 1.0000  
Dilution: : 1.0000  
Use Multiplier & Dilution Factor with ISTDs

Signal 1: VWD1 A, Wavelength=254 nm

| Peak # | RetTime [min] | Type | Width [min] | Area mAU *s | Height [mAU] | Area %  |
|--------|---------------|------|-------------|-------------|--------------|---------|
| 1      | 12.756        | BB   | 0.2556      | 444.30624   | 26.86493     | 50.4494 |
| 2      | 21.571        | BB   | 0.4147      | 436.39029   | 16.27583     | 49.5506 |

Totals : 880.69653 43.14075

=====

\*\*\* End of Report \*\*\*

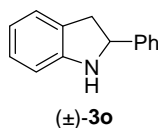

Data File C:\CHEM32\1\DATA\ZHOU-18\YZN009687.D  
Sample Name: CY-28-33

=====

Acq. Operator :  
Acq. Instrument : Instrument 1 Location : -  
Injection Date : 8/2/2018 4:57:44 PM  
Acq. Method : C:\CHEM32\1\METHODS\DEF\_LC11.M  
Last changed : 8/2/2018 4:40:44 PM  
(modified after loading)  
Analysis Method : C:\CHEM32\1\METHODS\DEF\_LC11.M  
Last changed : 8/2/2018 7:33:26 PM  
(modified after loading)  
Sample Info : 0D-H, Hexane/i-PrOH = 90/10, 01.0 mL/min, 30 oC, 254 nm

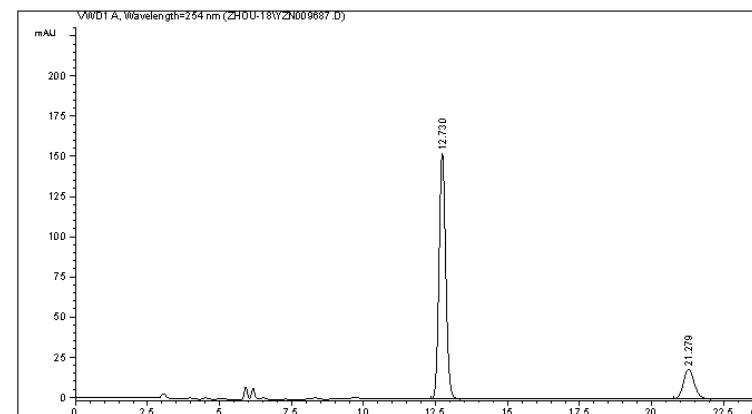

=====

Area Percent Report

=====

Sorted By : Signal  
Multiplier: : 1.0000  
Dilution: : 1.0000  
Use Multiplier & Dilution Factor with ISTDs

Signal 1: VWD1 A, Wavelength=254 nm

| Peak # | RetTime [min] | Type | Width [min] | Area mAU *s | Height [mAU] | Area %  |
|--------|---------------|------|-------------|-------------|--------------|---------|
| 1      | 12.730        | BB   | 0.2518      | 2481.02319  | 153.02696    | 83.7969 |
| 2      | 21.279        | BB   | 0.4059      | 479.73358   | 18.41287     | 16.2031 |

Totals : 2960.75677 171.43983

=====

\*\*\* End of Report \*\*\*

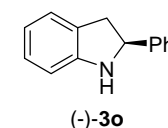

Supplement: c8qo00710a1.pdf [file c8qo00710a1.pdf]
